# Supplementary material for: Effect of the substituent on C–H activation catalyzed by a non-heme Fe(iv)O complex: a computational investigation of reactivity and hydrogen tunneling
Source: Royal Society of Chemistry journal article supplement (doi:10.1039/d2dt01529c), 2022-01-01
Supplement: d2dt01529c1.pdf [file d2dt01529c1.pdf]

### Supporting information for

## Effect of Substituent on C-H Activation Catalysed by a nonheme Iron-Oxo Complex: A Computational Investigation of Reactivity and Hydrogen Tunneling

Akanksha Katoch and Debasish Mandal\*

School of Chemistry and Biochemistry, Thapar Institute of Engineering and Technology,

Patiala-147001, Punjab, India

Corresponding author: [debasish.mandal@thapar.edu](mailto:debasish.mandal@thapar.edu)

| S. No. | CONTENTS                                                                                                                                                                                                                           | Page no.      |
|--------|------------------------------------------------------------------------------------------------------------------------------------------------------------------------------------------------------------------------------------|---------------|
| 1      | <b>Table S1</b> The relative energies (in kcal mol <sup>-1</sup> ) for all the investigated reactions computed at different level of theory.                                                                                       | <b>S2</b>     |
| 2      | <b>Table S2</b> Transmission coefficients for hydrogen and deuterium ( $\kappa_H$ and $\kappa_D$ ), Kinetic Isotope Effect (KIE) at 298K computed using different method.                                                          | <b>S3</b>     |
| 3      | <b>Fig. S1</b> Optimized geometries of the oxidants with key geometrical parameters computed at B1 level of theory (distances are in Å and angles are in degree)                                                                   | <b>S3</b>     |
| 4      | <b>Fig. S2</b> Optimized geometries of the intermediates with key geometrical parameters computed at B1 level of theory (distances are in Å and angles are in degree)                                                              | <b>S4</b>     |
| 5      | <b>Fig. S3</b> Spin natural orbitals and their occupations for the oxidants of the unsubstituted parent compound (H). Upper panel represents <sup>3</sup> R while bottom panel represents <sup>5</sup> R                           | <b>S4</b>     |
| 6      | <b>Fig. S4</b> Spin natural orbitals and their occupations for the transition states of the reactions between the parent compound (H) and EB. Upper panel represents <sup>3</sup> TS while bottom panel represents <sup>5</sup> TS | <b>S5</b>     |
| 7      | <b>Fig. S5</b> Spin natural orbitals and their occupations for the intermediates for the reactions between the parent compound (H) and EB. Upper panel represents <sup>3</sup> I while bottom panel represents <sup>5</sup> I      | <b>S5</b>     |
| 8      | <b>Table S3</b> Mulliken spin densities and charges for oxidants                                                                                                                                                                   | <b>S6</b>     |
| 9      | <b>Table S4</b> Mulliken spin densities and charges of stationary points along S=1 and S=2                                                                                                                                         | <b>S6</b>     |
| 10     | Thermochemistry and Cartesian coordinates of optimized geometries of all the stationary points.                                                                                                                                    | <b>S7-S29</b> |

**Table S1** The relative energies (in kcal mol<sup>-1</sup>) for all the investigated reactions computed at different level of theory.

| Reactions                        | Spin state | Species          | B1+ZPE | B2+ZPE | B2+G <sup>corr</sup> (298K) |
|----------------------------------|------------|------------------|--------|--------|-----------------------------|
| H                                | S=1        | <sup>3</sup> R+S | 0.0    | 0.0    | 0.0                         |
|                                  |            | <sup>3</sup> TS  | 17.3   | 14.6   | 26.9                        |
|                                  |            | <sup>3</sup> I   | -0.2   | -5.3   | 4.2                         |
|                                  | S=2        | <sup>5</sup> R+S | 5.8    | 1.7    | -0.01                       |
|                                  |            | <sup>5</sup> TS  | 21.1   | 10.6   | 18.6                        |
|                                  |            | <sup>5</sup> I   | 5.4    | -9.3   | -2.3                        |
| N(CH <sub>3</sub> ) <sub>2</sub> | S=1        | <sup>3</sup> R+S | 0.0    | 0.0    | 0.0                         |
|                                  |            | <sup>3</sup> TS  | 17.3   | 14.7   | 26.7                        |
|                                  |            | <sup>3</sup> I   | -0.2   | -5.1   | 4.1                         |
|                                  | S=2        | <sup>5</sup> R+S | 5.4    | 1.5    | -0.6                        |
|                                  |            | <sup>5</sup> TS  | 21.0   | 10.7   | 19.1                        |
|                                  |            | <sup>5</sup> I   | 5.0    | -8.8   | -3.3                        |
| OMe                              | S=1        | <sup>3</sup> R+S | 0.0    | 0.0    | 0.0                         |
|                                  |            | <sup>3</sup> TS  | 17.3   | 14.7   | 26.7                        |
|                                  |            | <sup>3</sup> I   | -0.4   | -5.2   | 3.9                         |
|                                  | S=2        | <sup>5</sup> R+S | 5.5    | 1.6    | -0.2                        |
|                                  |            | <sup>5</sup> TS  | 20.9   | 10.6   | 18.8                        |
|                                  |            | <sup>5</sup> I   | 6.6    | -7.7   | -0.7                        |
| NO <sub>2</sub>                  | S=1        | <sup>3</sup> R+S | 0.0    | 0.0    | 0.0                         |
|                                  |            | <sup>3</sup> TS  | 16.5   | 13.8   | 25.4                        |
|                                  |            | <sup>3</sup> I   | -0.6   | -5.6   | 3.2                         |
|                                  | S=2        | <sup>5</sup> R+S | 6.6    | 2.4    | 0.6                         |
|                                  |            | <sup>5</sup> TS  | 19.3   | 10.3   | 18.5                        |
|                                  |            | <sup>5</sup> I   | 6.6    | -8.8   | -1.8                        |
| SO <sub>2</sub> CF <sub>3</sub>  | S=1        | <sup>3</sup> R+S | 0.0    | 0.0    | 0.0                         |
|                                  |            | <sup>3</sup> TS  | 16.5   | 13.9   | 26.1                        |
|                                  |            | <sup>3</sup> I   | -0.8   | -5.3   | 4.3                         |
|                                  | S=2        | <sup>5</sup> R+S | 6.4    | 2.7    | 1.3                         |
|                                  |            | <sup>5</sup> TS  | 20.5   | 10.6   | 18.6                        |
|                                  |            | <sup>5</sup> I   | 6.5    | -7.8   | 0.3                         |
| N4PY                             | S=1        | <sup>3</sup> R+S | 0.0    | 0.0    | 0.0                         |
|                                  |            | <sup>3</sup> TS  | 16.5   | 13.9   | 26.1                        |
|                                  |            | <sup>3</sup> I   | -0.5   | -5.5   | 3.2                         |
|                                  | S=2        | <sup>5</sup> R+S | 10.4   | 5.4    | 3.3                         |
|                                  |            | <sup>5</sup> TS  | 20.2   | 11.3   | 18.7                        |
|                                  |            | <sup>5</sup> I   | 4.5    | -9.7   | -2.7                        |

**Table S2** Transmission coefficients for hydrogen and deuterium ( $\kappa_H$  and  $\kappa_D$ ), Kinetic Isotope Effect (KIE) at 298K computed using different method.

| Reaction                         | Species | $\kappa_H$ | $\kappa_D$ | KIE <sub>Eyring</sub> | KIE <sub>Eckart</sub> | KIE <sub>Wigner</sub> |
|----------------------------------|---------|------------|------------|-----------------------|-----------------------|-----------------------|
| H                                | S=1     | 154.6      | 11.8       | 5.2                   | 68.8                  | 7.9                   |
|                                  | S=2     | 20.8       | 5.2        | 5.5                   | 21.9(32)*             | 7.5                   |
| N(CH <sub>3</sub> ) <sub>2</sub> | S=1     | 167.6      | 12.3       | 5.2                   | 71.2                  | 7.9                   |
|                                  | S=2     | 25.0       | 5.7        | 5.3                   | 23.5                  | 7.4                   |
| OMe                              | S=1     | 164.4      | 12.2       | 5.2                   | 70.6                  | 7.9                   |
|                                  | S=2     | 23.71      | 5.57       | 5.3                   | 22.6                  | 7.4                   |
| NO <sub>2</sub>                  | S=1     | 105.7      | 9.9        | 5.2                   | 55.2                  | 7.8                   |
|                                  | S=2     | 10.1       | 3.8        | 5.0                   | 13.3                  | 6.6                   |
| SO <sub>2</sub> CF <sub>3</sub>  | S=1     | 111.80     | 10.15      | 5.1                   | 56.5                  | 7.7                   |
|                                  | S=2     | 10.4       | 3.81       | 5.0                   | 13.7                  | 6.6                   |

\*Experimental value

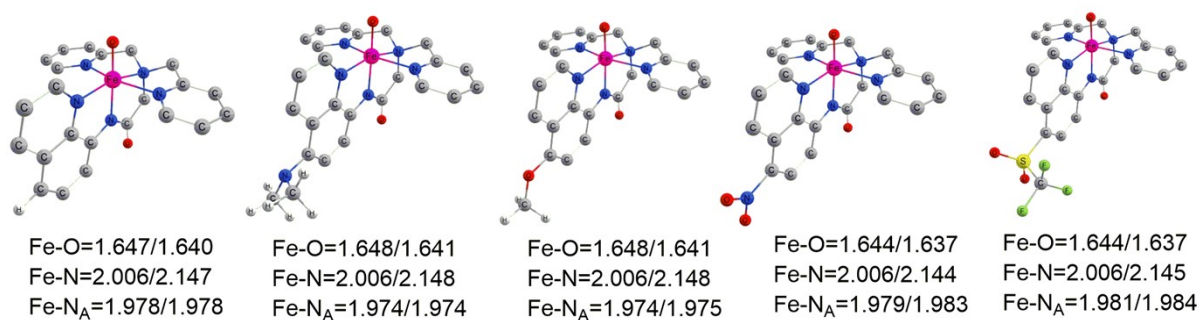

**Fig. S1** Optimized geometries of the oxidants with key geometrical parameters computed at B1 level of theory (distances are in Å and angles are in degree).

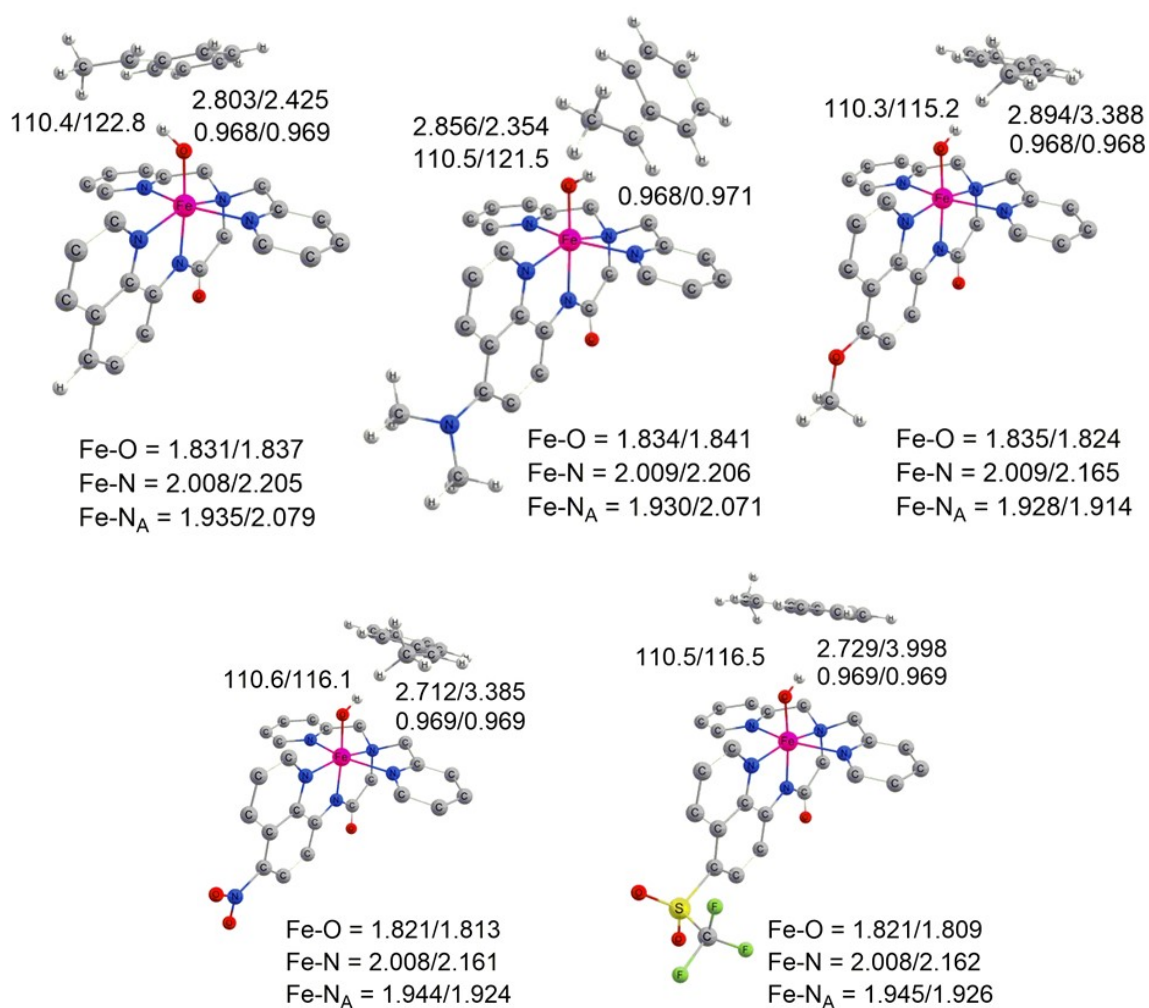

**Fig. S2** Optimized geometries of the intermediates with key geometrical parameters computed at B1 level of theory (distances are in Å and angles are in degree)

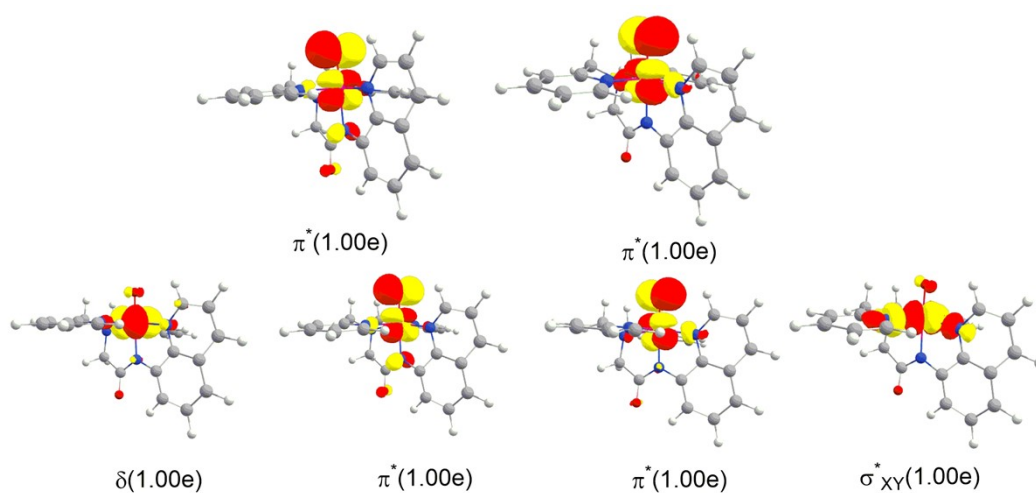

**Fig. S3** Spin natural orbitals and their occupations for the oxidants of the unsubstituted parent compound (H). Upper panel represents  $^3R$  while bottom panel represents  $^5R$

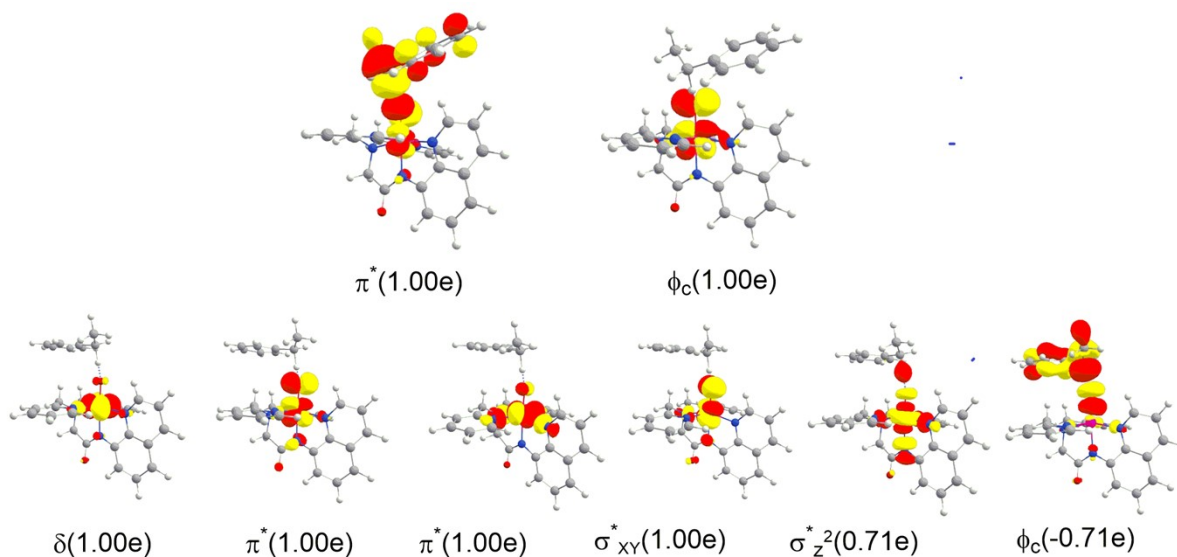

**Fig. S4** Spin natural orbitals and their occupations for the transition states of the reactions between the parent compound (H) and EB. Upper panel represents  $^3\text{TS}$  while bottom panel represents  $^5\text{TS}$

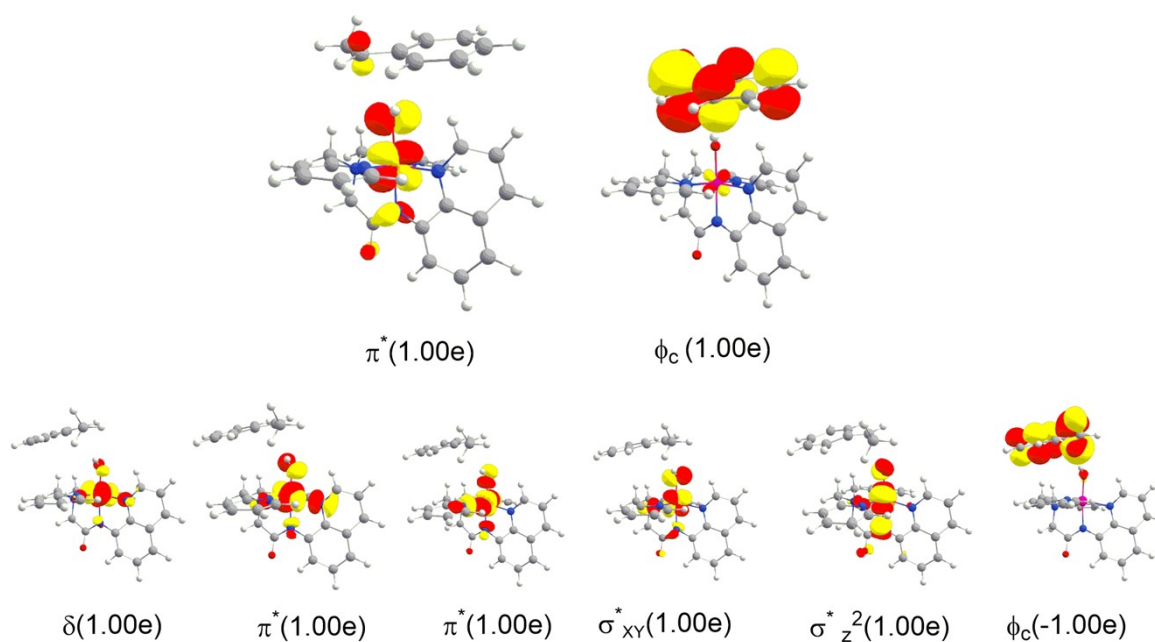

**Fig. S5** Spin natural orbitals and their occupations for the intermediates for the reactions between the parent compound (H) and EB. Upper panel represents  $^3\text{I}$  while bottom panel represents  $^5\text{I}$

**Table S3** Mulliken spin densities and charges for oxidants

| Species                           | Spin State | Mulliken Spin Density |       |        | Mulliken Charges |       |        |
|-----------------------------------|------------|-----------------------|-------|--------|------------------|-------|--------|
|                                   |            | Fe                    | O     | Rest   | Fe               | O     | Rest   |
| -H                                | S=1        | 1.255                 | 0.871 | -0.126 | 0.094            | 0.220 | -0.314 |
|                                   | S=2        | 3.116                 | 0.708 | 0.176  | 0.176            | 0.271 | -0.447 |
| -N(CH <sub>3</sub> ) <sub>2</sub> | S=1        | 1.265                 | 0.863 | -0.128 | -0.077           | 0.255 | -0.178 |
|                                   | S=2        | 3.120                 | 0.698 | 0.182  | -0.065           | 0.297 | -0.232 |
| -OMe                              | S=1        | 1.263                 | 0.864 | -0.127 | -0.131           | 0.241 | -0.11  |
|                                   | S=2        | 3.118                 | 0.699 | 0.183  | 0.011            | 0.277 | -0.288 |
| -NO <sub>2</sub>                  | S=1        | 1.247                 | 0.884 | -0.131 | 0.027            | 0.278 | -0.305 |
|                                   | S=2        | 3.119                 | 0.714 | 0.167  | 0.099            | 0.309 | -0.408 |
| -SO <sub>2</sub> CF <sub>3</sub>  | S=1        | 1.247                 | 0.883 | -0.13  | -0.150           | 0.278 | -0.128 |
|                                   | S=2        | 3.113                 | 0.717 | 0.17   | 0.215            | 0.297 | -0.512 |

**Table S4** Mulliken spin densities and charges of stationary points along S=1 and S=2

| Oxidant                          | Species         | Mulliken Spin Density |       |        |        |       | Mulliken Charges |        |       |        |      |
|----------------------------------|-----------------|-----------------------|-------|--------|--------|-------|------------------|--------|-------|--------|------|
|                                  |                 | Fe                    | O     | H      | C      | Rest  | Fe               | O      | H     | C      | Rest |
| H                                | <sup>3</sup> TS | 0.995                 | 0.634 | -0.031 | 0.359  | 0.043 | -1.647           | 0.329  | 0.694 | -0.756 | 1.38 |
|                                  | <sup>3</sup> I  | 0.974                 | 0.108 | 0.003  | 0.834  | 0.081 | -1.602           | 0.023  | 0.443 | -0.234 | 1.37 |
|                                  | <sup>5</sup> TS | 3.791                 | 0.180 | 0.031  | -0.294 | 0.292 | -1.853           | 0.717  | 0.929 | -0.946 | 1.15 |
|                                  | <sup>5</sup> I  | 4.254                 | 0.280 | 0.028  | -0.826 | 0.264 | -1.156           | 0.038  | 0.504 | -0.396 | 1.01 |
| N(CH <sub>3</sub> ) <sub>2</sub> | <sup>3</sup> TS | 0.991                 | 0.633 | -0.027 | 0.360  | 0.043 | -1.706           | 0.283  | 0.628 | -0.697 | 1.49 |
|                                  | <sup>3</sup> I  | 0.970                 | 0.104 | 0.004  | 0.831  | 0.091 | -1.511           | -0.001 | 0.378 | -0.186 | 1.32 |
|                                  | <sup>5</sup> TS | 3.777                 | 0.173 | 0.032  | -0.297 | 0.315 | -2.044           | 0.718  | 0.934 | -0.947 | 1.34 |
|                                  | <sup>5</sup> I  | 4.212                 | 0.276 | 0.049  | -0.822 | 0.285 | -1.847           | 0.252  | 0.474 | -0.312 | 1.43 |
| OMe                              | <sup>3</sup> TS | 0.995                 | 0.632 | -0.030 | 0.365  | 0.038 | -1.606           | 0.301  | 0.667 | -0.732 | 1.37 |
|                                  | <sup>3</sup> I  | 0.970                 | 0.104 | 0.003  | 0.832  | 0.091 | -1.334           | -0.012 | 0.383 | -0.209 | 1.17 |
|                                  | <sup>5</sup> TS | 3.779                 | 0.171 | 0.031  | -0.297 | 0.316 | -1.792           | 0.700  | 0.949 | -0.940 | 1.08 |
|                                  | <sup>5</sup> I  | 4.238                 | 0.277 | 0.025  | -0.821 | 0.281 | -0.913           | 0.045  | 0.457 | -0.407 | 0.82 |
| NO <sub>2</sub>                  | <sup>3</sup> TS | 0.977                 | 0.648 | -0.023 | 0.362  | 0.036 | -1.505           | 0.385  | 0.639 | -0.774 | 1.26 |
|                                  | <sup>3</sup> I  | 0.967                 | 0.121 | 0.002  | 0.820  | 0.09  | -1.433           | 0.063  | 0.407 | -0.137 | 1.1  |
|                                  | <sup>5</sup> TS | 3.774                 | 0.203 | 0.026  | -0.278 | 0.275 | -1.966           | 0.755  | 0.869 | -0.937 | 1.28 |
|                                  | <sup>5</sup> I  | 4.245                 | 0.300 | 0.026  | -0.811 | 0.24  | -1.160           | 0.128  | 0.539 | -0.417 | 0.91 |
| SO <sub>2</sub> CF <sub>3</sub>  | <sup>3</sup> TS | 0.978                 | 0.651 | -0.028 | 0.357  | 0.042 | -1.595           | 0.276  | 0.661 | -0.730 | 1.39 |
|                                  | <sup>3</sup> I  | 0.965                 | 0.121 | 0.003  | 0.831  | 0.08  | -1.384           | -0.015 | 0.401 | -0.237 | 1.24 |
|                                  | <sup>5</sup> TS | 3.763                 | 0.203 | 0.026  | -0.278 | 0.286 | -1.853           | 0.723  | 0.904 | -0.941 | 1.17 |
|                                  | <sup>5</sup> I  | 4.234                 | 0.303 | 0.026  | -0.821 | 0.258 | -1.113           | 0.042  | 0.477 | -0.397 | 0.99 |

## Thermochemistry and Cartesian coordinates of all the stationary points computed at B1 Level of Theory

|                                                           |              |              |                                                    |                                                           |              |              |              |
|-----------------------------------------------------------|--------------|--------------|----------------------------------------------------|-----------------------------------------------------------|--------------|--------------|--------------|
| <b><sup>31</sup> [Fe(IV)ODpaqH]ClO<sub>4</sub></b>        |              |              | O                                                  | 6.559690000                                               | -0.172312000 | 1.464471000  |              |
| Zero-point correction= 0.417631 (Hartree/Particle)        |              |              | O                                                  | 4.257945000                                               | 0.657567000  | 1.433747000  |              |
| Thermal correction to Energy= 0.447724                    |              |              | O                                                  | 4.892465000                                               | -1.238984000 | 0.027663000  |              |
| Thermal correction to Enthalpy= 0.448668                  |              |              | O                                                  | 5.710556000                                               | 1.004235000  | -0.504016000 |              |
| Thermal correction to Gibbs Free Energy= 0.352774         |              |              | <b><sup>51</sup> [Fe(IV)ODpaqH]ClO<sub>4</sub></b> |                                                           |              |              |              |
| Sum of electronic and zero-point Energies= -2196.566613   |              |              | Zero-point correction= 0.415623 (Hartree/Particle) |                                                           |              |              |              |
| Sum of electronic and thermal Energies= -2196.536520      |              |              | Thermal correction to Energy= 0.446677             |                                                           |              |              |              |
| Sum of electronic and thermal Enthalpies= -2196.535576    |              |              | Thermal correction to Enthalpy= 0.447621           |                                                           |              |              |              |
| Sum of electronic and thermal Free Energies= -2196.631470 |              |              | Thermal correction to Gibbs Free Energy= 0.347994  |                                                           |              |              |              |
| Fe                                                        | -0.878994000 | -0.287693000 | -0.874977000                                       | Sum of electronic and zero-point Energies= -2196.557364   |              |              |              |
| N                                                         | -0.878572000 | 0.098642000  | 1.064781000                                        | Sum of electronic and thermal Energies= -2196.526310      |              |              |              |
| C                                                         | -1.984565000 | 0.786245000  | 1.541844000                                        | Sum of electronic and thermal Enthalpies= -2196.525365    |              |              |              |
| C                                                         | -2.932119000 | 1.091623000  | 0.515854000                                        | Sum of electronic and thermal Free Energies= -2196.624993 |              |              |              |
| C                                                         | -2.270223000 | 1.196513000  | 2.841076000                                        | Fe                                                        | -1.009761000 | -0.226271000 | -0.964482000 |
| C                                                         | -4.136923000 | 1.794287000  | 0.793651000                                        | N                                                         | -0.962797000 | 0.129987000  | 0.980789000  |
| C                                                         | -3.469190000 | 1.895524000  | 3.115750000                                        | C                                                         | -2.082761000 | 0.761195000  | 1.522291000  |
| H                                                         | -1.566106000 | 0.973871000  | 3.630820000                                        | C                                                         | -3.096830000 | 1.046673000  | 0.558797000  |
| C                                                         | -3.454324000 | 0.919151000  | -1.758957000                                       | C                                                         | -2.321828000 | 1.132524000  | 2.843376000  |
| C                                                         | -5.005378000 | 2.044107000  | -0.299718000                                       | C                                                         | -4.315570000 | 1.687259000  | 0.915117000  |
| C                                                         | -4.389342000 | 2.195359000  | 2.131355000                                        | C                                                         | -3.534656000 | 1.770229000  | 3.198008000  |
| H                                                         | -3.663373000 | 2.202714000  | 4.139145000                                        | H                                                         | -1.571110000 | 0.927749000  | 3.592524000  |
| C                                                         | -4.667192000 | 1.610257000  | -1.564512000                                       | C                                                         | -3.735136000 | 0.903429000  | -1.691610000 |
| H                                                         | -3.145306000 | 0.558651000  | -2.733702000                                       | C                                                         | -5.249773000 | 1.919878000  | -0.124614000 |
| H                                                         | -5.935359000 | 2.578428000  | -0.129147000                                       | C                                                         | -4.518146000 | 2.048968000  | 2.272294000  |
| H                                                         | -5.303362000 | 2.732777000  | 2.362450000                                        | H                                                         | -3.684830000 | 2.044941000  | 4.237760000  |
| H                                                         | -5.314865000 | 1.789272000  | -2.414793000                                       | C                                                         | -4.963189000 | 1.531644000  | -1.419166000 |
| N                                                         | -2.621505000 | 0.671925000  | -0.754121000                                       | H                                                         | -3.462249000 | 0.579608000  | -2.690219000 |
| C                                                         | 0.170270000  | -0.325924000 | 1.801791000                                        | H                                                         | -6.192524000 | 2.406363000  | 0.108238000  |
| O                                                         | 0.354020000  | -0.194133000 | 3.016488000                                        | H                                                         | -5.441892000 | 2.539006000  | 2.561994000  |
| C                                                         | 1.225804000  | -1.050988000 | 0.959747000                                        | H                                                         | -5.664576000 | 1.701124000  | -2.227588000 |
| H                                                         | 2.179637000  | -0.527994000 | 1.073986000                                        | N                                                         | -2.839460000 | 0.671953000  | -0.734833000 |
| N                                                         | 0.887787000  | -1.164214000 | -0.510321000                                       | C                                                         | 0.125725000  | -0.250045000 | 1.704486000  |
| C                                                         | -0.642218000 | -3.067385000 | -0.482774000                                       | O                                                         | 0.298258000  | -0.102861000 | 2.917077000  |
| C                                                         | -2.861784000 | -2.455041000 | -0.119275000                                       | C                                                         | 1.230214000  | -0.931044000 | 0.889851000  |
| C                                                         | -0.922175000 | -4.395760000 | -0.175823000                                       | H                                                         | 2.154343000  | -0.364004000 | 1.038350000  |
| C                                                         | -3.214677000 | -3.765766000 | 0.184788000                                        | N                                                         | 0.953685000  | -1.081132000 | -0.575450000 |
| H                                                         | -3.591418000 | -1.655540000 | -0.103606000                                       | C                                                         | -0.410767000 | -3.129878000 | -0.524059000 |
| C                                                         | -2.228652000 | -4.750943000 | 0.158495000                                        | C                                                         | -2.679176000 | -2.783153000 | -0.146720000 |
| H                                                         | -0.127924000 | -5.133420000 | -0.200798000                                       | C                                                         | -0.526383000 | -4.480596000 | -0.199995000 |
| H                                                         | -4.241677000 | -3.998325000 | 0.440851000                                        | C                                                         | -2.876211000 | -4.122045000 | 0.176136000  |
| H                                                         | -2.470405000 | -5.780714000 | 0.399494000                                        | H                                                         | -3.496600000 | -2.070172000 | -0.132875000 |
| N                                                         | -1.604338000 | -2.117793000 | -0.446244000                                       | C                                                         | -1.778813000 | -4.983396000 | 0.150431000  |
| C                                                         | 0.714003000  | -2.584741000 | -0.930284000                                       | H                                                         | 0.349656000  | -5.119381000 | -0.224228000 |
| H                                                         | 0.749968000  | -2.613776000 | -2.022915000                                       | H                                                         | -3.865381000 | -4.472786000 | 0.446807000  |
| H                                                         | 1.520297000  | -3.214343000 | -0.542888000                                       | H                                                         | -1.894760000 | -6.031569000 | 0.405608000  |
| H                                                         | 1.361722000  | -2.052866000 | 1.375122000                                        | N                                                         | -1.472667000 | -2.306645000 | -0.489172000 |
| C                                                         | -0.136549000 | 2.634907000  | -1.138358000                                       | C                                                         | 0.883366000  | -2.504006000 | -0.989306000 |
| C                                                         | 1.563936000  | 1.045948000  | -1.290478000                                       | H                                                         | 0.907271000  | -2.534886000 | -2.083208000 |
| C                                                         | 0.772529000  | 3.677260000  | -1.284831000                                       | H                                                         | 1.747039000  | -3.067404000 | -0.619725000 |
| H                                                         | -1.195625000 | 2.821222000  | -1.014463000                                       | H                                                         | 1.398528000  | -1.916396000 | 1.333854000  |
| C                                                         | 2.531320000  | 2.039307000  | -1.416295000                                       | C                                                         | -0.067716000 | 2.770272000  | -1.224771000 |
| C                                                         | 2.126785000  | 3.374067000  | -1.419539000                                       | C                                                         | 1.613360000  | 1.165100000  | -1.332281000 |
| H                                                         | 0.418081000  | 4.701389000  | -1.281429000                                       | C                                                         | 0.854743000  | 3.806659000  | -1.326095000 |
| H                                                         | 3.578280000  | 1.765086000  | -1.489570000                                       | H                                                         | -1.131276000 | 2.963849000  | -1.135117000 |
| H                                                         | 2.861444000  | 4.166482000  | -1.517793000                                       | C                                                         | 2.599357000  | 2.147756000  | -1.413047000 |
| N                                                         | 0.253913000  | 1.350461000  | -1.142637000                                       | C                                                         | 2.210080000  | 3.486940000  | -1.415689000 |
| C                                                         | 1.873039000  | -0.427126000 | -1.358188000                                       | H                                                         | 0.513874000  | 4.835581000  | -1.322016000 |
| H                                                         | 1.730702000  | -0.761441000 | -2.389849000                                       | H                                                         | 3.645313000  | 1.862038000  | -1.452609000 |
| H                                                         | 2.899231000  | -0.652201000 | -1.053700000                                       | H                                                         | 2.957017000  | 4.271726000  | -1.477958000 |
| O                                                         | -0.930789000 | -0.588392000 | -2.493022000                                       | N                                                         | 0.310700000  | 1.483055000  | -1.229823000 |
| Cl                                                        | 5.360209000  | 0.063438000  | 0.608672000                                        |                                                           |              |              |              |

|    |              |              |              |
|----|--------------|--------------|--------------|
| C  | 1.918464000  | -0.312385000 | -1.405477000 |
| H  | 1.791561000  | -0.636341000 | -2.443537000 |
| H  | 2.949098000  | -0.524440000 | -1.103326000 |
| O  | -1.127531000 | -0.491923000 | -2.578582000 |
| Cl | 5.375825000  | 0.099902000  | 0.691534000  |
| O  | 6.580112000  | -0.164889000 | 1.532705000  |
| O  | 4.296173000  | 0.711671000  | 1.532786000  |
| O  | 4.876557000  | -1.189428000 | 0.108243000  |
| O  | 5.733921000  | 1.039643000  | -0.419800000 |

**<sup>32</sup> [Fe(IV)ODpaqN(CH<sub>3</sub>)<sub>2</sub>]ClO<sub>4</sub>**

Zero-point correction= 0.490607 (Hartree/Particle)

Thermal correction to Energy= 0.524902

Thermal correction to Enthalpy= 0.525846

Thermal correction to Gibbs Free Energy= 0.420998

Sum of electronic and zero-point Energies= -2330.461072

Sum of electronic and thermal Energies= -2330.426778

Sum of electronic and thermal Enthalpies= -2330.425833

Sum of electronic and thermal Free Energies= -2330.530681

|    |              |              |              |
|----|--------------|--------------|--------------|
| Fe | -0.154727000 | 0.842373000  | 0.970839000  |
| N  | -0.491460000 | 0.096315000  | -0.825392000 |
| C  | -1.771781000 | -0.400690000 | -1.038398000 |
| C  | -2.613488000 | -0.288520000 | 0.108530000  |
| C  | -2.319971000 | -0.960383000 | -2.185585000 |
| C  | -3.964101000 | -0.736269000 | 0.105501000  |
| C  | -3.648654000 | -1.441708000 | -2.186704000 |
| H  | -1.708978000 | -1.046221000 | -3.073857000 |
| C  | -2.788635000 | 0.499063000  | 2.309579000  |
| C  | -4.727757000 | -0.474463000 | 1.269130000  |
| C  | -4.479114000 | -1.371570000 | -1.076217000 |
| H  | -4.016547000 | -1.899384000 | -3.098287000 |
| C  | -4.145281000 | 0.131291000  | 2.364673000  |
| H  | -2.281012000 | 0.970401000  | 3.143700000  |
| H  | -5.779421000 | -0.737157000 | -1.023917000 |
| H  | -4.715641000 | 0.340312000  | 3.262170000  |
| N  | -2.058881000 | 0.306286000  | 1.216218000  |
| C  | 0.507540000  | 0.125188000  | -1.730126000 |
| O  | 0.490860000  | -0.270255000 | -2.902058000 |
| C  | 1.795511000  | 0.734614000  | -1.165042000 |
| H  | 2.596028000  | -0.006384000 | -1.246381000 |
| N  | 1.689455000  | 1.203847000  | 0.269106000  |
| C  | 0.592953000  | 3.362270000  | -0.044716000 |
| C  | -1.733050000 | 3.213318000  | -0.073353000 |
| C  | 0.553561000  | 4.630485000  | -0.616678000 |
| C  | -1.846607000 | 4.482384000  | -0.631873000 |
| H  | -2.606335000 | 2.614581000  | 0.151965000  |
| C  | -0.684820000 | 5.200894000  | -0.910207000 |
| H  | 1.478404000  | 5.156376000  | -0.825562000 |
| H  | -2.828544000 | 4.887798000  | -0.845868000 |
| H  | -0.739844000 | 6.189075000  | -1.354470000 |
| N  | -0.539703000 | 2.670128000  | 0.213606000  |
| C  | 1.867995000  | 2.680103000  | 0.381474000  |
| H  | 2.051358000  | 2.912065000  | 1.434334000  |
| H  | 2.728625000  | 3.021527000  | -0.201254000 |
| H  | 2.079351000  | 1.579138000  | -1.798132000 |
| C  | -0.000619000 | -2.061418000 | 1.807607000  |
| C  | 1.995142000  | -0.908387000 | 1.450792000  |
| C  | 0.685529000  | -3.236773000 | 2.094630000  |
| H  | -1.082109000 | -2.018466000 | 1.825947000  |
| C  | 2.745052000  | -2.054466000 | 1.701385000  |
| C  | 2.078423000  | -3.233797000 | 2.033606000  |
| H  | 0.130599000  | -4.132339000 | 2.348722000  |
| H  | 3.826015000  | -2.020175000 | 1.616413000  |
| H  | 2.640386000  | -4.139997000 | 2.234461000  |
| N  | 0.642874000  | -0.926011000 | 1.493627000  |
| C  | 2.606805000  | 0.439296000  | 1.167013000  |
| H  | 2.676238000  | 0.990425000  | 2.109387000  |

|    |              |              |              |
|----|--------------|--------------|--------------|
| H  | 3.607182000  | 0.359599000  | 0.731885000  |
| O  | 0.073178000  | 1.458525000  | 2.481789000  |
| Cl | 5.645157000  | -1.199169000 | -0.931675000 |
| O  | 6.760171000  | -1.410990000 | -1.900616000 |
| O  | 4.351563000  | -1.648923000 | -1.542223000 |
| O  | 5.546585000  | 0.258252000  | -0.587978000 |
| O  | 5.905558000  | -1.985587000 | 0.317400000  |
| N  | -5.812683000 | -1.854124000 | -1.059265000 |
| C  | -6.482500000 | -1.942925000 | -2.353789000 |
| H  | -6.119341000 | -2.774408000 | -2.981018000 |
| H  | -7.551727000 | -2.101155000 | -2.183421000 |
| H  | -6.354429000 | -1.008663000 | -2.905675000 |
| C  | -6.017295000 | -3.077935000 | -0.269546000 |
| H  | -7.088132000 | -3.223148000 | -0.097623000 |
| H  | -5.624764000 | -3.970088000 | -0.784842000 |
| H  | -5.521692000 | -3.000395000 | 0.699145000  |

**<sup>52</sup> [Fe(IV)ODpaqN(CH<sub>3</sub>)<sub>2</sub>]ClO<sub>4</sub>**

Zero-point correction= 0.488544 (Hartree/Particle)

Thermal correction to Energy= 0.523857

Thermal correction to Enthalpy= 0.524801

Thermal correction to Gibbs Free Energy= 0.415607

Sum of electronic and zero-point Energies= -2330.452393

Sum of electronic and thermal Energies= -2330.417080

Sum of electronic and thermal Enthalpies= -2330.416136

Sum of electronic and thermal Free Energies= -2330.525330

|    |              |              |              |
|----|--------------|--------------|--------------|
| Fe | -0.271817000 | 0.819543000  | 1.100113000  |
| N  | -0.572661000 | 0.081904000  | -0.706393000 |
| C  | -1.861336000 | -0.386165000 | -0.976721000 |
| C  | -2.758627000 | -0.262280000 | 0.122263000  |
| C  | -2.368670000 | -0.927825000 | -2.152945000 |
| C  | -4.117318000 | -0.680980000 | 0.049921000  |
| C  | -3.704400000 | -1.382197000 | -2.225083000 |
| H  | -1.719512000 | -1.023875000 | -3.011415000 |
| C  | -3.034190000 | 0.530005000  | 2.315020000  |
| C  | -4.932853000 | -0.394713000 | 1.168963000  |
| C  | -4.588206000 | -1.305727000 | -1.157096000 |
| H  | -4.031671000 | -1.827822000 | -3.157618000 |
| C  | -4.397296000 | 0.199600000  | 2.297977000  |
| H  | -2.558773000 | 0.987896000  | 3.175797000  |
| H  | -5.990559000 | -0.628047000 | 1.122903000  |
| H  | -5.012859000 | 0.424478000  | 3.160945000  |
| N  | -2.252164000 | 0.317565000  | 1.258372000  |
| C  | 0.448955000  | 0.064772000  | -1.602720000 |
| O  | 0.410511000  | -0.352481000 | -2.764310000 |
| C  | 1.771959000  | 0.632373000  | -1.077704000 |
| H  | 2.537058000  | -0.142377000 | -1.188119000 |
| N  | 1.746588000  | 1.125644000  | 0.337312000  |
| C  | 0.816537000  | 3.373902000  | -0.036705000 |
| C  | -1.506025000 | 3.467470000  | -0.104774000 |
| C  | 0.920576000  | 4.625860000  | -0.640961000 |
| C  | -1.483415000 | 4.725991000  | -0.697446000 |
| H  | -2.439612000 | 2.962808000  | 0.120023000  |
| C  | -0.247241000 | 5.312446000  | -0.971132000 |
| H  | 1.898124000  | 5.048778000  | -0.845259000 |
| H  | -2.413848000 | 5.225093000  | -0.942303000 |
| H  | -0.192594000 | 6.288871000  | -1.441125000 |
| N  | -0.378940000 | 2.814459000  | 0.216411000  |
| C  | 2.016758000  | 2.581288000  | 0.426718000  |
| H  | 2.203715000  | 2.822077000  | 1.478027000  |
| H  | 2.911667000  | 2.854293000  | -0.143226000 |
| H  | 2.061962000  | 1.449431000  | -1.744771000 |
| C  | 0.100480000  | -2.195785000 | 1.936678000  |
| C  | 2.059363000  | -1.016226000 | 1.507246000  |
| C  | 0.807366000  | -3.370545000 | 2.172794000  |
| H  | -0.981789000 | -2.161050000 | 2.002790000  |
| C  | 2.835627000  | -2.157812000 | 1.704307000  |



|    |              |              |              |
|----|--------------|--------------|--------------|
| C  | 2.196978000  | -3.349229000 | 2.047712000  |
| H  | 0.275349000  | -4.277669000 | 2.435536000  |
| H  | 3.911447000  | -2.110003000 | 1.570795000  |
| H  | 2.777037000  | -4.252417000 | 2.207442000  |
| N  | 0.719278000  | -1.050249000 | 1.613291000  |
| C  | 2.653412000  | 0.341862000  | 1.216609000  |
| H  | 2.744066000  | 0.883742000  | 2.163707000  |
| H  | 3.651100000  | 0.257419000  | 0.773776000  |
| O  | -0.111948000 | 1.420536000  | 2.618717000  |
| Cl | 5.662341000  | -1.215238000 | -1.038230000 |
| O  | 6.785013000  | -1.397651000 | -2.005038000 |
| O  | 4.384363000  | -1.704892000 | -1.649968000 |
| O  | 5.521958000  | 0.239448000  | -0.698646000 |
| O  | 5.944868000  | -1.990197000 | 0.213473000  |
| N  | -5.925588000 | -1.763093000 | -1.210221000 |
| C  | -6.525639000 | -1.859780000 | -2.538006000 |
| H  | -6.146819000 | -2.710017000 | -3.129287000 |
| H  | -7.605580000 | -1.992091000 | -2.423226000 |
| H  | -6.347235000 | -0.938314000 | -3.097127000 |
| C  | -6.214037000 | -2.961180000 | -0.406410000 |
| H  | -7.296181000 | -3.060086000 | -0.278996000 |
| H  | -5.836234000 | -3.877013000 | -0.889372000 |
| H  | -5.757085000 | -2.885645000 | 0.580795000  |

**<sup>33</sup> [Fe(IV)ODpaqOMe]ClO<sub>4</sub>**

Zero-point correction= 0.450233 (Hartree/Particle)

Thermal correction to Energy= 0.483033

Thermal correction to Enthalpy= 0.483977

Thermal correction to Gibbs Free Energy= 0.382089

Sum of electronic and zero-point Energies= -2311.057771

Sum of electronic and thermal Energies= -2311.024971

Sum of electronic and thermal Enthalpies= -2311.024027

Sum of electronic and thermal Free Energies= -2311.125916

|    |              |              |              |
|----|--------------|--------------|--------------|
| Fe | 0.382872000  | 0.724140000  | -0.966146000 |
| N  | 0.654471000  | -0.019299000 | 0.842463000  |
| C  | 1.898869000  | -0.598370000 | 1.072770000  |
| C  | 2.755023000  | -0.546900000 | -0.066320000 |
| C  | 2.394853000  | -1.195654000 | 2.224358000  |
| C  | 4.071859000  | -1.080330000 | -0.049838000 |
| C  | 3.703770000  | -1.733285000 | 2.261921000  |
| H  | 1.765800000  | -1.246806000 | 3.102598000  |
| C  | 2.985047000  | 0.135254000  | -2.295878000 |
| C  | 4.837511000  | -0.976793000 | -1.234101000 |
| C  | 4.539928000  | -1.686613000 | 1.159267000  |
| H  | 4.041173000  | -2.188210000 | 3.185173000  |
| C  | 4.296519000  | -0.372079000 | -2.351898000 |
| H  | 2.516065000  | 0.619277000  | -3.145331000 |
| H  | 5.845317000  | -1.375787000 | -1.249918000 |
| H  | 4.861561000  | -0.279735000 | -3.271926000 |
| N  | 2.246506000  | 0.049194000  | -1.194309000 |
| C  | -0.347614000 | 0.083150000  | 1.736373000  |
| O  | -0.369011000 | -0.306116000 | 2.910959000  |
| C  | -1.584645000 | 0.778082000  | 1.156082000  |
| H  | -2.437908000 | 0.098793000  | 1.238646000  |
| N  | -1.435186000 | 1.223660000  | -0.281941000 |
| C  | -0.189009000 | 3.302346000  | 0.014334000  |
| C  | 2.120592000  | 2.990824000  | 0.053506000  |
| C  | -0.062389000 | 4.570885000  | 0.572792000  |
| C  | 2.321436000  | 4.254972000  | 0.598321000  |
| H  | 2.950148000  | 2.329712000  | -0.162304000 |
| C  | 1.212103000  | 5.056088000  | 0.864974000  |
| H  | -0.948597000 | 5.162821000  | 0.772108000  |
| H  | 3.328894000  | 4.592881000  | 0.810987000  |
| H  | 1.335052000  | 6.042766000  | 1.298841000  |
| N  | 0.892889000  | 2.529319000  | -0.231266000 |
| C  | -1.507124000 | 2.707573000  | -0.411385000 |
| H  | -1.668061000 | 2.939828000  | -1.467823000 |

|    |              |              |              |
|----|--------------|--------------|--------------|
| H  | -2.343949000 | 3.116399000  | 0.162323000  |
| H  | -1.810243000 | 1.647842000  | 1.778428000  |
| C  | 0.027305000  | -2.173575000 | -1.761639000 |
| C  | -1.883370000 | -0.875295000 | -1.440097000 |
| C  | -0.738915000 | -3.300894000 | -2.038635000 |
| H  | 1.109201000  | -2.208600000 | -1.770429000 |
| C  | -2.711432000 | -1.968127000 | -1.682038000 |
| C  | -2.128491000 | -3.196992000 | -1.991549000 |
| H  | -0.247636000 | -4.237653000 | -2.274547000 |
| H  | -3.787783000 | -1.855051000 | -1.608024000 |
| H  | -2.752287000 | -4.063380000 | -2.185338000 |
| N  | -0.535510000 | -0.990371000 | -1.470295000 |
| C  | -2.398589000 | 0.516525000  | -1.178833000 |
| H  | -2.419955000 | 1.059384000  | -2.128308000 |
| H  | -3.405624000 | 0.515485000  | -0.751685000 |
| O  | 0.207665000  | 1.333524000  | -2.486908000 |
| Cl | -5.574798000 | -0.866165000 | 0.905956000  |
| O  | -6.716430000 | -0.978290000 | 1.860563000  |
| O  | -4.326572000 | -1.397537000 | 1.544612000  |
| O  | -5.364953000 | 0.573620000  | 0.538694000  |
| O  | -5.873841000 | -1.654384000 | -0.333331000 |
| O  | 5.806794000  | -2.175334000 | 1.105062000  |
| C  | 6.341580000  | -2.793973000 | 2.275140000  |
| H  | 5.750571000  | -3.669846000 | 2.565166000  |
| H  | 7.351898000  | -3.106955000 | 2.012047000  |
| H  | 6.382949000  | -2.088306000 | 3.112351000  |

**<sup>53</sup> [Fe(IV)ODpaqOMe]ClO<sub>4</sub>**

Zero-point correction= 0.448284 (Hartree/Particle)

Thermal correction to Energy= 0.482041

Thermal correction to Enthalpy= 0.482985

Thermal correction to Gibbs Free Energy= 0.377332

Sum of electronic and zero-point Energies= -2311.049053

Sum of electronic and thermal Energies= -2311.015296

Sum of electronic and thermal Enthalpies= -2311.014351

Sum of electronic and thermal Free Energies= -2311.120004

|    |              |              |              |
|----|--------------|--------------|--------------|
| Fe | 0.502257000  | 0.692641000  | -1.095423000 |
| N  | 0.730907000  | -0.031805000 | 0.727255000  |
| C  | 1.982434000  | -0.583813000 | 1.021618000  |
| C  | 2.899431000  | -0.527866000 | -0.065366000 |
| C  | 2.431104000  | -1.161820000 | 2.204142000  |
| C  | 4.224357000  | -1.034038000 | 0.028207000  |
| C  | 3.745807000  | -1.672049000 | 2.320828000  |
| H  | 1.759326000  | -1.219931000 | 3.048366000  |
| C  | 3.241597000  | 0.134923000  | -2.289651000 |
| C  | 5.049051000  | -0.926524000 | -1.112561000 |
| C  | 4.641326000  | -1.619310000 | 1.266686000  |
| H  | 4.038086000  | -2.110419000 | 3.267052000  |
| C  | 4.560524000  | -0.344275000 | -2.269269000 |
| H  | 2.809635000  | 0.600174000  | -3.169262000 |
| H  | 6.064091000  | -1.304878000 | -1.068417000 |
| H  | 5.176073000  | -0.251794000 | -3.156116000 |
| N  | 2.444992000  | 0.044705000  | -1.225916000 |
| C  | -0.297706000 | 0.038401000  | 1.611345000  |
| O  | -0.300485000 | -0.361429000 | 2.780223000  |
| C  | -1.571265000 | 0.690613000  | 1.063076000  |
| H  | -2.390985000 | -0.025695000 | 1.175279000  |
| N  | -1.495579000 | 1.159281000  | -0.358564000 |
| C  | -0.404978000 | 3.338279000  | -0.009668000 |
| C  | 1.917669000  | 3.262807000  | 0.075768000  |
| C  | -0.421303000 | 4.603679000  | 0.574979000  |
| C  | 1.983005000  | 4.528692000  | 0.649351000  |
| H  | 2.813448000  | 2.687916000  | -0.133784000 |
| C  | 0.791244000  | 5.208173000  | 0.904239000  |
| H  | -1.366774000 | 5.099846000  | 0.765124000  |
| H  | 2.945747000  | 4.962269000  | 0.894148000  |
| H  | 0.804925000  | 6.193190000  | 1.359029000  |

|    |              |              |              |
|----|--------------|--------------|--------------|
| N  | 0.748049000  | 2.689120000  | -0.244924000 |
| C  | -1.656695000 | 2.629079000  | -0.471906000 |
| H  | -1.816815000 | 2.866965000  | -1.528286000 |
| H  | -2.533551000 | 2.975948000  | 0.085788000  |
| H  | -1.808937000 | 1.536438000  | 1.714696000  |
| C  | -0.083957000 | -2.300414000 | -1.885107000 |
| C  | -1.954133000 | -0.971450000 | -1.499172000 |
| C  | -0.873760000 | -3.422980000 | -2.112071000 |
| H  | 0.998509000  | -2.347755000 | -1.938375000 |
| C  | -2.811012000 | -2.055129000 | -1.688760000 |
| C  | -2.259349000 | -3.296234000 | -2.005602000 |
| H  | -0.407841000 | -4.371380000 | -2.353724000 |
| H  | -3.881651000 | -1.924838000 | -1.570421000 |
| H  | -2.903314000 | -4.156167000 | -2.158925000 |
| N  | -0.619149000 | -1.106710000 | -1.587456000 |
| C  | -2.448773000 | 0.431276000  | -1.236481000 |
| H  | -2.488996000 | 0.963283000  | -2.192639000 |
| H  | -3.454332000 | 0.427989000  | -0.803705000 |
| O  | 0.400287000  | 1.275751000  | -2.625906000 |
| Cl | -5.560696000 | -0.893631000 | 1.017935000  |
| O  | -6.671185000 | -0.996688000 | 2.010203000  |
| O  | -4.311331000 | -1.489562000 | 1.594047000  |
| O  | -5.313151000 | 0.548906000  | 0.687793000  |
| O  | -5.932884000 | -1.630357000 | -0.233278000 |
| O  | 5.916811000  | -2.080619000 | 1.286745000  |
| C  | 6.401865000  | -2.674116000 | 2.492256000  |
| H  | 5.814752000  | -3.559200000 | 2.760543000  |
| H  | 7.431130000  | -2.967246000 | 2.286635000  |
| H  | 6.382701000  | -1.957256000 | 3.320428000  |

**<sup>34</sup> [Fe(IV)ODpaqNO<sub>2</sub>][ClO<sub>4</sub>]**

Zero-point correction= 0.419980 (Hartree/Particle)  
 Thermal correction to Energy= 0.452739  
 Thermal correction to Enthalpy= 0.453683  
 Thermal correction to Gibbs Free Energy= 0.350566  
 Sum of electronic and zero-point Energies= -2401.059279  
 Sum of electronic and thermal Energies= -2401.026520  
 Sum of electronic and thermal Enthalpies= -2401.025576  
 Sum of electronic and thermal Free Energies= -2401.128693

|    |              |              |              |
|----|--------------|--------------|--------------|
| Fe | 0.218691000  | 0.783682000  | -0.976418000 |
| N  | 0.537998000  | 0.029685000  | 0.826035000  |
| C  | 1.780281000  | -0.496532000 | 1.053100000  |
| C  | 2.652936000  | -0.415545000 | -0.090368000 |
| C  | 2.276628000  | -1.077931000 | 2.222163000  |
| C  | 3.990701000  | -0.904777000 | -0.080211000 |
| C  | 3.586462000  | -1.560163000 | 2.250734000  |
| H  | 1.642247000  | -1.150772000 | 3.093286000  |
| C  | 2.820608000  | 0.309613000  | -2.312049000 |
| C  | 4.731405000  | -0.739391000 | -1.283551000 |
| C  | 4.434708000  | -1.492711000 | 1.151711000  |
| H  | 3.967838000  | -2.011178000 | 3.157622000  |
| C  | 4.148964000  | -0.140069000 | -2.380476000 |
| H  | 2.320442000  | 0.785090000  | -3.147874000 |
| H  | 5.751374000  | -1.087485000 | -1.328501000 |
| H  | 4.706216000  | -0.009850000 | -3.300773000 |
| N  | 2.106458000  | 0.173933000  | -1.201338000 |
| C  | -0.479276000 | 0.096047000  | 1.730084000  |
| O  | -0.477104000 | -0.295652000 | 2.895866000  |
| C  | -1.739407000 | 0.743313000  | 1.150215000  |
| H  | -2.561099000 | 0.025011000  | 1.227737000  |
| N  | -1.610211000 | 1.209357000  | -0.282842000 |
| C  | -0.442586000 | 3.330227000  | 0.031487000  |
| C  | 1.877489000  | 3.104086000  | 0.056668000  |
| C  | -0.359924000 | 4.598589000  | 0.598008000  |
| C  | 2.034006000  | 4.371060000  | 0.608558000  |
| H  | 2.731287000  | 2.478160000  | -0.168626000 |
| C  | 0.897226000  | 5.128527000  | 0.886922000  |

|    |              |              |              |
|----|--------------|--------------|--------------|
| H  | -1.266372000 | 5.155798000  | 0.805929000  |
| H  | 3.029476000  | 4.744652000  | 0.817485000  |
| H  | 0.985872000  | 6.116093000  | 1.326932000  |
| N  | 0.665778000  | 2.598455000  | -0.224273000 |
| C  | -1.739433000 | 2.691870000  | -0.393996000 |
| H  | -1.916444000 | 2.930212000  | -1.446481000 |
| H  | -2.588262000 | 3.059904000  | 0.189205000  |
| H  | -2.002180000 | 1.594399000  | 1.783160000  |
| C  | -0.035499000 | -2.118515000 | -1.799815000 |
| C  | -1.990202000 | -0.891588000 | -1.460285000 |
| C  | -0.762566000 | -3.267556000 | -2.090913000 |
| H  | 1.046809000  | -2.118229000 | -1.811605000 |
| C  | -2.779870000 | -2.009364000 | -1.715182000 |
| C  | -2.154833000 | -3.212910000 | -2.040805000 |
| H  | -0.238968000 | -4.183130000 | -2.339787000 |
| H  | -3.859281000 | -1.934747000 | -1.637684000 |
| H  | -2.748226000 | -4.098006000 | -2.244927000 |
| N  | -0.638760000 | -0.958989000 | -1.491969000 |
| C  | -2.553122000 | 0.477859000  | -1.183733000 |
| H  | -2.597411000 | 1.029792000  | -2.127090000 |
| H  | -3.557113000 | 0.439325000  | -0.751546000 |
| O  | 0.022955000  | 1.397099000  | -2.488723000 |
| Cl | -5.611397000 | -1.035463000 | 0.929463000  |
| O  | -6.716046000 | -1.210091000 | 1.916778000  |
| O  | -4.321898000 | -1.523796000 | 1.520507000  |
| O  | -5.471118000 | 0.417481000  | 0.580473000  |
| O  | -5.915259000 | -1.815814000 | -0.313265000 |
| N  | 5.764001000  | -2.047155000 | 1.327642000  |
| O  | 6.091188000  | -2.437798000 | 2.455294000  |
| O  | 6.526850000  | -2.121395000 | 0.353965000  |

**<sup>54</sup> [Fe(IV)ODpaqNO<sub>2</sub>][ClO<sub>4</sub>]**

Zero-point correction= 0.417957 (Hartree/Particle)  
 Thermal correction to Energy= 0.451707  
 Thermal correction to Enthalpy= 0.452652  
 Thermal correction to Gibbs Free Energy= 0.345534  
 Sum of electronic and zero-point Energies= -2401.048826  
 Sum of electronic and thermal Energies= -2401.015075  
 Sum of electronic and thermal Enthalpies= -2401.014131  
 Sum of electronic and thermal Free Energies= -2401.121248

|    |              |              |              |
|----|--------------|--------------|--------------|
| Fe | 0.325966000  | 0.762633000  | -1.104720000 |
| N  | 0.607771000  | 0.018266000  | 0.711851000  |
| C  | 1.859101000  | -0.482240000 | 0.995086000  |
| C  | 2.791773000  | -0.389537000 | -0.097614000 |
| C  | 2.310922000  | -1.050389000 | 2.188397000  |
| C  | 4.136011000  | -0.852956000 | -0.016151000 |
| C  | 3.628272000  | -1.507582000 | 2.288501000  |
| H  | 1.638392000  | -1.136009000 | 3.027813000  |
| C  | 3.068598000  | 0.333935000  | -2.312092000 |
| C  | 4.937193000  | -0.670881000 | -1.177088000 |
| C  | 4.529295000  | -1.429445000 | 1.236586000  |
| H  | 3.967109000  | -1.948223000 | 3.217180000  |
| C  | 4.406637000  | -0.084892000 | -2.308600000 |
| H  | 2.604113000  | 0.796443000  | -3.175978000 |
| H  | 5.965650000  | -0.997005000 | -1.163970000 |
| H  | 5.013113000  | 0.056202000  | -3.195404000 |
| N  | 2.299542000  | 0.184525000  | -1.238547000 |
| C  | -0.431650000 | 0.044627000  | 1.607924000  |
| O  | -0.409936000 | -0.362929000 | 2.766893000  |
| C  | -1.728380000 | 0.650424000  | 1.066391000  |
| H  | -2.515820000 | -0.102299000 | 1.173888000  |
| N  | -1.677210000 | 1.138810000  | -0.348564000 |
| C  | -0.663614000 | 3.352418000  | 0.015342000  |
| C  | 1.662214000  | 3.359996000  | 0.082625000  |
| C  | -0.720196000 | 4.612894000  | 0.607369000  |
| C  | 1.685797000  | 4.623777000  | 0.663107000  |
| H  | 2.577101000  | 2.820680000  | -0.137525000 |

|    |              |              |              |
|----|--------------|--------------|--------------|
| C  | 0.472436000  | 5.258385000  | 0.931134000  |
| H  | -1.681320000 | 5.073789000  | 0.807102000  |
| H  | 2.634330000  | 5.090033000  | 0.902835000  |
| H  | 0.454277000  | 6.240602000  | 1.391616000  |
| N  | 0.510818000  | 2.746079000  | -0.231790000 |
| C  | -1.893393000 | 2.603913000  | -0.442908000 |
| H  | -2.073502000 | 2.847662000  | -1.494608000 |
| H  | -2.776706000 | 2.910657000  | 0.127412000  |
| H  | -1.998656000 | 1.476123000  | 1.730641000  |
| C  | -0.128566000 | -2.234673000 | -1.938587000 |
| C  | -2.051875000 | -0.991935000 | -1.519454000 |
| C  | -0.872449000 | -3.383736000 | -2.184902000 |
| H  | 0.954302000  | -2.237011000 | -1.998832000 |
| C  | -2.863023000 | -2.106702000 | -1.726962000 |
| C  | -2.261477000 | -3.317164000 | -2.069984000 |
| H  | -0.368405000 | -4.306509000 | -2.447889000 |
| H  | -3.937461000 | -2.023111000 | -1.601435000 |
| H  | -2.869641000 | -4.200067000 | -2.237744000 |
| N  | -0.712087000 | -1.070388000 | -1.613992000 |
| C  | -2.604867000 | 0.383653000  | -1.232514000 |
| H  | -2.674065000 | 0.927979000  | -2.179864000 |
| H  | -3.605751000 | 0.332363000  | -0.792783000 |
| O  | 0.184092000  | 1.362229000  | -2.621061000 |
| Cl | -5.598796000 | -1.065357000 | 1.043622000  |
| O  | -6.686099000 | -1.232518000 | 2.052011000  |
| O  | -4.318531000 | -1.632067000 | 1.581568000  |
| O  | -5.405228000 | 0.393085000  | 0.747680000  |
| O  | -5.967530000 | -1.781359000 | -0.220278000 |
| N  | 5.858529000  | -1.964006000 | 1.479502000  |
| O  | 6.150773000  | -2.298834000 | 2.633190000  |
| O  | 6.649118000  | -2.078110000 | 0.533228000  |

### <sup>35</sup> [Fe(IV)ODpaqSO<sub>2</sub>CF<sub>3</sub>]ClO<sub>4</sub>

Zero-point correction= 0.431861 (Hartree/Particle)

Thermal correction to Energy= 0.469295

Thermal correction to Enthalpy= 0.470239

Thermal correction to Gibbs Free Energy= 0.355932

Sum of electronic and zero-point Energies= -3082.127891

Sum of electronic and thermal Energies= -3082.090458

Sum of electronic and thermal Enthalpies= -3082.089514

Sum of electronic and thermal Free Energies= -3082.203821

|    |              |              |              |
|----|--------------|--------------|--------------|
| Fe | 0.791582000  | 1.129094000  | 0.940325000  |
| N  | 0.226253000  | 0.399728000  | -0.812904000 |
| C  | -1.110849000 | 0.140684000  | -0.961723000 |
| C  | -1.884416000 | 0.473849000  | 0.205912000  |
| C  | -1.776370000 | -0.382377000 | -2.071522000 |
| C  | -3.293144000 | 0.294911000  | 0.268213000  |
| C  | -3.163995000 | -0.571109000 | -2.024724000 |
| H  | -1.215412000 | -0.637412000 | -2.958745000 |
| C  | -1.795610000 | 1.316282000  | 2.388125000  |
| C  | -3.932311000 | 0.669457000  | 1.481167000  |
| C  | -3.917190000 | -0.246399000 | -0.903427000 |
| H  | -3.668924000 | -0.973569000 | -2.895609000 |
| C  | -3.187604000 | 1.172443000  | 2.525922000  |
| H  | -1.169767000 | 1.705624000  | 3.182897000  |
| H  | -5.004199000 | 0.565915000  | 1.582196000  |
| H  | -3.660597000 | 1.461401000  | 3.456934000  |
| N  | -1.174277000 | 0.978335000  | 1.264930000  |
| C  | 1.190096000  | 0.177538000  | -1.747514000 |
| O  | 1.052970000  | -0.293975000 | -2.875586000 |
| C  | 2.578130000  | 0.612943000  | -1.271377000 |
| H  | 3.281112000  | -0.213851000 | -1.400345000 |
| N  | 2.634233000  | 1.103204000  | 0.158343000  |
| C  | 1.980636000  | 3.431322000  | -0.163587000 |
| C  | -0.330087000 | 3.738239000  | -0.124481000 |
| C  | 2.171086000  | 4.677901000  | -0.751847000 |
| C  | -0.211478000 | 4.999600000  | -0.698208000 |

|    |              |              |              |
|----|--------------|--------------|--------------|
| H  | -1.296632000 | 3.324915000  | 0.133329000  |
| C  | 1.058962000  | 5.475927000  | -1.018517000 |
| H  | 3.173739000  | 5.011495000  | -0.993877000 |
| H  | -1.102147000 | 5.585861000  | -0.890998000 |
| H  | 1.183585000  | 6.452109000  | -1.474907000 |
| N  | 0.743241000  | 2.975379000  | 0.137389000  |
| C  | 3.110770000  | 2.516113000  | 0.232048000  |
| H  | 3.380245000  | 2.720839000  | 1.271774000  |
| H  | 3.997477000  | 2.667544000  | -0.390398000 |
| H  | 2.914187000  | 1.414283000  | -1.934646000 |
| C  | 0.407125000  | -1.718294000 | 1.892364000  |
| C  | 2.570603000  | -1.001232000 | 1.400069000  |
| C  | 0.861318000  | -2.993044000 | 2.211686000  |
| H  | -0.642669000 | -1.462532000 | 1.953426000  |
| C  | 3.092311000  | -2.260487000 | 1.684953000  |
| C  | 2.223653000  | -3.268996000 | 2.100732000  |
| H  | 0.153215000  | -3.748315000 | 2.531842000  |
| H  | 4.157029000  | -2.431344000 | 1.567241000  |
| H  | 2.605293000  | -4.258530000 | 2.329683000  |
| N  | 1.245392000  | -0.746765000 | 1.495762000  |
| C  | 3.427964000  | 0.179738000  | 1.026428000  |
| H  | 3.680930000  | 0.725588000  | 1.939986000  |
| H  | 4.353657000  | -0.130750000 | 0.535934000  |
| O  | 1.193289000  | 1.726067000  | 2.418096000  |
| Cl | 6.260416000  | -2.096788000 | -0.890684000 |
| O  | 7.670722000  | -2.093533000 | -1.379941000 |
| O  | 5.491163000  | -1.008314000 | -1.583802000 |
| O  | 6.246753000  | -1.840608000 | 0.589939000  |
| O  | 5.622286000  | -3.417028000 | -1.173435000 |
| S  | -5.662427000 | -0.547654000 | -1.014450000 |
| O  | -6.422579000 | 0.453375000  | -0.249874000 |
| O  | -6.018249000 | -0.846943000 | -2.407860000 |
| C  | -5.900161000 | -2.166607000 | -0.090430000 |
| F  | -7.195991000 | -2.473981000 | -0.106722000 |
| F  | -5.487877000 | -2.032057000 | 1.173848000  |
| F  | -5.200674000 | -3.131716000 | -0.685774000 |

### <sup>55</sup> [Fe(IV)ODpaqSO<sub>2</sub>CF<sub>3</sub>]ClO<sub>4</sub>

Zero-point correction= 0.429799 (Hartree/Particle)

Thermal correction to Energy= 0.468170

Thermal correction to Enthalpy= 0.469114

Thermal correction to Gibbs Free Energy= 0.351666

Sum of electronic and zero-point Energies= -3082.117769

Sum of electronic and thermal Energies= -3082.079398

Sum of electronic and thermal Enthalpies= -3082.078454

Sum of electronic and thermal Free Energies= -3082.195902

|    |              |              |              |
|----|--------------|--------------|--------------|
| Fe | 0.751057000  | 1.144404000  | 1.102489000  |
| N  | 0.222396000  | 0.365759000  | -0.644088000 |
| C  | -1.121780000 | 0.132265000  | -0.844430000 |
| C  | -1.951351000 | 0.505842000  | 0.270184000  |
| C  | -1.745507000 | -0.406345000 | -1.971065000 |
| C  | -3.364284000 | 0.351035000  | 0.265524000  |
| C  | -3.138358000 | -0.572392000 | -1.990929000 |
| H  | -1.150908000 | -0.692406000 | -2.825036000 |
| C  | -1.964714000 | 1.411008000  | 2.432270000  |
| C  | -4.056828000 | 0.768931000  | 1.433695000  |
| C  | -3.941314000 | -0.209628000 | -0.919806000 |
| H  | -3.602616000 | -0.987716000 | -2.878212000 |
| C  | -3.361686000 | 1.291758000  | 2.504379000  |
| H  | -1.373636000 | 1.815492000  | 3.246506000  |
| H  | -5.134166000 | 0.683736000  | 1.481257000  |
| H  | -3.879409000 | 1.613136000  | 3.400168000  |
| N  | -1.294065000 | 1.029841000  | 1.350180000  |
| C  | 1.194943000  | 0.097469000  | -1.572975000 |
| O  | 1.026300000  | -0.375878000 | -2.694657000 |
| C  | 2.618617000  | 0.438403000  | -1.126138000 |
| H  | 3.219077000  | -0.473124000 | -1.207524000 |

|    |              |              |              |
|----|--------------|--------------|--------------|
| N  | 2.747526000  | 1.014787000  | 0.250330000  |
| C  | 2.229010000  | 3.371332000  | -0.236208000 |
| C  | -0.037533000 | 3.896282000  | -0.218708000 |
| C  | 2.531978000  | 4.546201000  | -0.921922000 |
| C  | 0.188878000  | 5.093534000  | -0.889557000 |
| H  | -1.036477000 | 3.591974000  | 0.074063000  |
| C  | 1.496730000  | 5.420934000  | -1.248756000 |
| H  | 3.559488000  | 4.765158000  | -1.190738000 |
| H  | -0.644187000 | 5.744489000  | -1.127903000 |
| H  | 1.707763000  | 6.342237000  | -1.781497000 |
| N  | 0.964056000  | 3.060613000  | 0.097578000  |
| C  | 3.285551000  | 2.397509000  | 0.230643000  |
| H  | 3.568445000  | 2.659685000  | 1.254920000  |
| H  | 4.184237000  | 2.463603000  | -0.391972000 |
| H  | 3.024553000  | 1.141914000  | -1.858531000 |
| C  | 0.572254000  | -1.821056000 | 2.128244000  |
| C  | 2.700006000  | -1.067655000 | 1.558265000  |
| C  | 1.054965000  | -3.090366000 | 2.428568000  |
| H  | -0.480293000 | -1.577794000 | 2.224248000  |
| C  | 3.253915000  | -2.320923000 | 1.815472000  |
| C  | 2.417192000  | -3.343002000 | 2.262648000  |
| H  | 0.372861000  | -3.859548000 | 2.771785000  |
| H  | 4.312874000  | -2.488039000 | 1.648488000  |
| H  | 2.822814000  | -4.327691000 | 2.470945000  |
| N  | 1.382336000  | -0.838506000 | 1.704243000  |
| C  | 3.528209000  | 0.128838000  | 1.154584000  |
| H  | 3.762579000  | 0.703029000  | 2.056817000  |
| H  | 4.469970000  | -0.173488000 | 0.686055000  |
| O  | 1.098752000  | 1.790392000  | 2.565725000  |
| Cl | 6.005399000  | -2.139341000 | -1.095974000 |
| O  | 6.970249000  | -2.608308000 | -2.133371000 |
| O  | 4.602060000  | -2.408673000 | -1.551459000 |
| O  | 6.177445000  | -0.664635000 | -0.877815000 |
| O  | 6.257408000  | -2.862806000 | 0.192188000  |
| S  | -5.686940000 | -0.477807000 | -1.114406000 |
| O  | -6.460635000 | 0.559478000  | -0.414903000 |
| O  | -5.975304000 | -0.804230000 | -2.516886000 |
| C  | -6.006510000 | -2.067028000 | -0.163771000 |
| F  | -7.306968000 | -2.344109000 | -0.235392000 |
| F  | -5.651669000 | -1.908774000 | 1.114961000  |
| F  | -5.302634000 | -3.061929000 | -0.701351000 |

### <sup>36</sup> [Fe(IV)ON4PYH](ClO<sub>4</sub>)<sub>2</sub>

Zero-point correction= 0.441657 (Hartree/Particle)

Thermal correction to Energy= 0.477178

Thermal correction to Enthalpy= 0.478122

Thermal correction to Gibbs Free Energy= 0.366609

Sum of electronic and zero-point Energies= -2882.637657

Sum of electronic and thermal Energies= -2882.602135

Sum of electronic and thermal Enthalpies= -2882.601191

Sum of electronic and thermal Free Energies= -2882.712705

|    |              |              |              |
|----|--------------|--------------|--------------|
| Fe | -0.593420000 | -1.950277000 | 0.132451000  |
| N  | -0.064316000 | 0.039302000  | -0.042733000 |
| N  | 0.896229000  | -2.154440000 | -1.181282000 |
| N  | 0.828546000  | -1.893368000 | 1.530860000  |
| N  | -1.837355000 | -1.513579000 | -1.342770000 |
| N  | -1.929419000 | -1.239328000 | 1.410646000  |
| O  | -0.988805000 | -3.524463000 | 0.276677000  |
| C  | 1.074961000  | -3.136934000 | -2.075078000 |
| C  | 2.162326000  | -3.124665000 | -2.945374000 |
| C  | 3.070028000  | -2.068193000 | -2.879711000 |
| C  | 2.878115000  | -1.045277000 | -1.945904000 |
| C  | 1.772435000  | -1.126413000 | -1.110080000 |
| C  | 1.433445000  | -0.154414000 | 0.008234000  |
| C  | 1.717911000  | -0.899855000 | 1.302807000  |
| C  | 2.789613000  | -0.665430000 | 2.153769000  |
| C  | 2.931975000  | -1.493608000 | 3.271634000  |

|    |              |              |              |
|----|--------------|--------------|--------------|
| C  | 2.010590000  | -2.515384000 | 3.498355000  |
| C  | 0.959665000  | -2.689027000 | 2.601082000  |
| C  | -2.793189000 | -2.348563000 | -1.793887000 |
| C  | -3.672253000 | -1.970501000 | -2.798966000 |
| C  | -3.563357000 | -0.687750000 | -3.339619000 |
| C  | -2.575907000 | 0.138858000  | -2.864405000 |
| C  | -1.713117000 | -0.274455000 | -1.864443000 |
| C  | -0.573793000 | 0.571223000  | -1.348240000 |
| C  | -0.623140000 | 0.790582000  | 1.126283000  |
| C  | -1.839662000 | 0.083709000  | 1.671421000  |
| C  | -2.797109000 | 0.728947000  | 2.451368000  |
| C  | -3.840360000 | -0.018298000 | 2.993723000  |
| C  | -3.906960000 | -1.388902000 | 2.737889000  |
| C  | -2.936838000 | -1.966035000 | 1.929435000  |
| H  | 0.337893000  | -3.931281000 | -2.072654000 |
| H  | 2.287916000  | -3.933154000 | -3.655773000 |
| H  | 3.922965000  | -2.037059000 | -3.549347000 |
| H  | 3.567622000  | -0.210642000 | -1.860010000 |
| H  | 1.992798000  | 0.783153000  | -0.066575000 |
| H  | 3.491545000  | 0.135386000  | 1.941197000  |
| H  | 3.757229000  | -1.339041000 | 3.958634000  |
| H  | 2.097508000  | -3.174885000 | 4.353655000  |
| H  | 0.214247000  | -3.466869000 | 2.717279000  |
| H  | -2.826878000 | -3.324385000 | -1.324726000 |
| H  | -4.427955000 | -2.667723000 | -3.140905000 |
| H  | -4.243229000 | -0.358788000 | -4.118359000 |
| H  | -2.471718000 | 1.177913000  | -3.249907000 |
| H  | -2.729619000 | 1.800200000  | 2.604119000  |
| H  | -4.596647000 | 0.464630000  | 3.603518000  |
| H  | -4.702144000 | -2.003701000 | 3.142724000  |
| H  | -2.940339000 | -3.018792000 | 1.673834000  |
| H  | -0.886635000 | 1.612053000  | -1.237682000 |
| H  | 0.238180000  | 0.554622000  | -2.080732000 |
| H  | -0.847195000 | 1.822353000  | 0.846376000  |
| H  | 0.134243000  | 0.831789000  | 1.914216000  |
| Cl | -2.848368000 | 3.796422000  | -0.141218000 |
| O  | -3.253935000 | 3.992626000  | 1.286340000  |
| O  | -1.345916000 | 3.807732000  | -0.233524000 |
| O  | -3.406797000 | 4.893815000  | -0.983208000 |
| O  | -3.351936000 | 2.471809000  | -0.628566000 |
| Cl | 4.783069000  | 2.288204000  | -0.132564000 |
| O  | 5.136836000  | 1.421462000  | -1.303490000 |
| O  | 5.526706000  | 3.577613000  | -0.219203000 |
| O  | 5.142778000  | 1.582373000  | 1.140025000  |
| O  | 3.306216000  | 2.558654000  | -0.146691000 |

### <sup>56</sup> [Fe(IV)ON4PYH](ClO<sub>4</sub>)<sub>2</sub>

Zero-point correction= 0.439491 (Hartree/Particle)

Thermal correction to Energy= 0.476058

Thermal correction to Enthalpy= 0.477002

Thermal correction to Gibbs Free Energy= 0.360929

Sum of electronic and zero-point Energies= -2882.621060

Sum of electronic and thermal Energies= -2882.584492

Sum of electronic and thermal Enthalpies= -2882.583548

Sum of electronic and thermal Free Energies= -2882.699621

|    |              |              |              |
|----|--------------|--------------|--------------|
| Fe | 0.829384000  | -2.102111000 | 0.090846000  |
| N  | 0.142626000  | -0.134880000 | 0.006008000  |
| N  | -0.765393000 | -2.172060000 | 1.493918000  |
| N  | -0.772313000 | -2.270193000 | -1.347057000 |
| N  | 2.135353000  | -1.246568000 | 1.506248000  |
| N  | 2.091450000  | -1.416574000 | -1.418929000 |
| O  | 1.361349000  | -3.635903000 | 0.163019000  |
| C  | -0.940741000 | -3.013350000 | 2.522778000  |
| C  | -2.045554000 | -2.906214000 | 3.363918000  |
| C  | -2.979082000 | -1.898704000 | 3.122469000  |
| C  | -2.794011000 | -1.021767000 | 2.048716000  |
| C  | -1.667449000 | -1.194294000 | 1.254143000  |

|    |              |              |              |
|----|--------------|--------------|--------------|
| C  | -1.352060000 | -0.379246000 | 0.008728000  |
| C  | -1.663988000 | -1.269133000 | -1.185310000 |
| C  | -2.777742000 | -1.132440000 | -2.005032000 |
| C  | -2.960638000 | -2.074504000 | -3.022492000 |
| C  | -2.037392000 | -3.106921000 | -3.184706000 |
| C  | -0.944956000 | -3.172473000 | -2.322563000 |
| C  | 3.230189000  | -1.845347000 | 2.008348000  |
| C  | 4.159796000  | -1.145605000 | 2.767562000  |
| C  | 3.955781000  | 0.218648000  | 2.983854000  |
| C  | 2.821933000  | 0.837546000  | 2.457621000  |
| C  | 1.915472000  | 0.066714000  | 1.733491000  |
| C  | 0.607523000  | 0.615944000  | 1.223077000  |
| C  | 0.628882000  | 0.525059000  | -1.256691000 |
| C  | 1.875236000  | -0.136675000 | -1.790147000 |
| C  | 2.736293000  | 0.510945000  | -2.674135000 |
| C  | 3.817397000  | -0.195287000 | -3.198183000 |
| C  | 4.019689000  | -1.525148000 | -2.821762000 |
| C  | 3.137911000  | -2.101212000 | -1.917634000 |
| H  | -0.180847000 | -3.774710000 | 2.659877000  |
| H  | -2.163859000 | -3.600691000 | 4.187287000  |
| H  | -3.846958000 | -1.791942000 | 3.764757000  |
| H  | -3.504817000 | -0.230039000 | 1.831194000  |
| H  | -1.920717000 | 0.555599000  | -0.019168000 |
| H  | -3.479375000 | -0.318045000 | -1.849785000 |
| H  | -3.818192000 | -1.998501000 | -3.682773000 |
| H  | -2.154159000 | -3.851483000 | -3.963394000 |
| H  | -0.192851000 | -3.949843000 | -2.402142000 |
| H  | 3.344672000  | -2.898580000 | 1.777389000  |
| H  | 5.029147000  | -1.657569000 | 3.163034000  |
| H  | 4.676869000  | 0.797823000  | 3.551217000  |
| H  | 2.647102000  | 1.900666000  | 2.580165000  |
| H  | 2.563864000  | 1.550714000  | -2.924744000 |
| H  | 4.499639000  | 0.289186000  | -3.888841000 |
| H  | 4.850113000  | -2.103499000 | -3.209178000 |
| H  | 3.248837000  | -3.120704000 | -1.566013000 |
| H  | 0.673120000  | 1.684584000  | 1.004212000  |
| H  | -0.141346000 | 0.494605000  | 2.010502000  |
| H  | 0.795441000  | 1.590696000  | -1.082183000 |
| H  | -0.154635000 | 0.443647000  | -2.015274000 |
| Cl | 2.143746000  | 4.196597000  | -0.069092000 |
| O  | 2.193286000  | 5.616481000  | -0.523401000 |
| O  | 0.710895000  | 3.736664000  | -0.027982000 |
| O  | 2.735430000  | 4.080519000  | 1.301440000  |
| O  | 2.908648000  | 3.329613000  | -1.021144000 |
| Cl | -4.744767000 | 2.063722000  | -0.053654000 |
| O  | -3.264047000 | 2.304630000  | 0.011053000  |
| O  | -5.461961000 | 3.370954000  | -0.054505000 |
| O  | -5.165625000 | 1.257180000  | 1.137687000  |
| O  | -5.067309000 | 1.309895000  | -1.308554000 |

Cartesian coordinates of the Oxidant:

### EB

Zero-point correction= 0.156843 (Hartree/Particle)  
 Thermal correction to Energy= 0.164182  
 Thermal correction to Enthalpy= 0.165126  
 Thermal correction to Gibbs Free Energy= 0.124587  
 Sum of electronic and zero-point Energies= -310.740718  
 Sum of electronic and thermal Energies= -310.733379  
 Sum of electronic and thermal Enthalpies= -310.732435  
 Sum of electronic and thermal Free Energies= -310.772975

|   |              |              |              |
|---|--------------|--------------|--------------|
| C | 0.435602000  | -0.000023000 | -0.327560000 |
| C | -0.270068000 | -1.203512000 | -0.184119000 |
| C | -1.638114000 | -1.206523000 | 0.095786000  |
| C | -2.327546000 | 0.000024000  | 0.237287000  |
| C | -1.638041000 | 1.206580000  | 0.095660000  |
| C | -0.270031000 | 1.203532000  | -0.184186000 |

|   |              |              |              |
|---|--------------|--------------|--------------|
| H | 0.258103000  | -2.147434000 | -0.297425000 |
| H | -2.165924000 | -2.150604000 | 0.198778000  |
| H | -3.392347000 | 0.000121000  | 0.451502000  |
| H | -2.165944000 | 2.150612000  | 0.198547000  |
| H | 0.258349000  | 2.147321000  | -0.297487000 |
| C | 1.927029000  | -0.000167000 | -0.592033000 |
| H | 2.191512000  | -0.879546000 | -1.190773000 |
| H | 2.191803000  | 0.878753000  | -1.191316000 |
| C | 2.763862000  | 0.000109000  | 0.699570000  |
| H | 3.834545000  | 0.000347000  | 0.470950000  |
| H | 2.546669000  | 0.884615000  | 1.307259000  |
| H | 2.547070000  | -0.884305000 | 1.307533000  |

Cartesian coordinates of the stationary points for the reactions  
with substrates:

### 1+EB

### <sup>3</sup>TS

Zero-point correction= 0.568834 (Hartree/Particle)  
 Thermal correction to Energy= 0.607851  
 Thermal correction to Enthalpy= 0.608796  
 Thermal correction to Gibbs Free Energy= 0.491298  
 Sum of electronic and zero-point Energies= -2507.279724  
 Sum of electronic and thermal Energies= -2507.240706  
 Sum of electronic and thermal Enthalpies= -2507.239762  
 Sum of electronic and thermal Free Energies= -2507.357260

|    |              |              |              |
|----|--------------|--------------|--------------|
| Fe | 0.255601000  | -0.011388000 | 0.020936000  |
| O  | 0.813555000  | -1.436950000 | 0.863336000  |
| N  | -0.441348000 | 1.628335000  | -0.836277000 |
| C  | 0.369762000  | 2.748420000  | -0.739857000 |
| C  | 1.566737000  | 2.508384000  | 0.004300000  |
| C  | 0.162974000  | 4.026533000  | -1.254433000 |
| C  | 2.524983000  | 3.535086000  | 0.230282000  |
| C  | 1.120671000  | 5.043428000  | -1.033963000 |
| H  | -0.736642000 | 4.226568000  | -1.819451000 |
| C  | 2.821138000  | 0.950674000  | 1.215876000  |
| C  | 3.670924000  | 3.193445000  | 0.993743000  |
| C  | 2.276473000  | 4.822450000  | -0.312017000 |
| H  | 0.930394000  | 6.029089000  | -1.448666000 |
| C  | 3.815432000  | 1.913793000  | 1.484838000  |
| H  | 2.898320000  | -0.065171000 | 1.583523000  |
| H  | 4.426134000  | 3.949774000  | 1.186639000  |
| H  | 2.998170000  | 5.616598000  | -0.149788000 |
| H  | 4.680440000  | 1.625963000  | 2.070687000  |
| N  | 1.741679000  | 1.237637000  | 0.496675000  |
| C  | -1.622127000 | 1.565758000  | -1.484936000 |
| O  | -2.209166000 | 2.467972000  | -2.095551000 |
| C  | -2.258140000 | 0.174564000  | -1.418545000 |
| H  | -3.235987000 | 0.262262000  | -0.936248000 |
| N  | -1.428914000 | -0.856344000 | -0.689894000 |
| C  | 0.219243000  | -1.453417000 | -2.397161000 |
| C  | 2.124901000  | -0.115784000 | -2.369750000 |
| C  | 0.510083000  | -1.901459000 | -3.683079000 |
| C  | 2.483201000  | -0.528829000 | -3.649194000 |
| H  | 2.728561000  | 0.592206000  | -1.816287000 |
| C  | 1.661771000  | -1.436293000 | -4.316948000 |
| H  | -0.158368000 | -2.599711000 | -4.174129000 |
| H  | 3.384641000  | -0.137640000 | -4.106313000 |
| H  | 1.908558000  | -1.771554000 | -5.318807000 |
| N  | 1.020628000  | -0.571688000 | -1.755569000 |
| C  | -0.965028000 | -1.941867000 | -1.600185000 |
| H  | -0.643039000 | -2.779326000 | -0.975716000 |
| H  | -1.773603000 | -2.290747000 | -2.249460000 |
| H  | -2.441350000 | -0.165486000 | -2.441231000 |
| C  | -0.692732000 | 1.264305000  | 2.600659000  |
| C  | -2.045942000 | -0.354953000 | 1.616362000  |

|    |              |              |              |
|----|--------------|--------------|--------------|
| C  | -1.614165000 | 1.470309000  | 3.622700000  |
| H  | 0.235454000  | 1.820391000  | 2.556178000  |
| C  | -3.024847000 | -0.184508000 | 2.592311000  |
| C  | -2.800772000 | 0.738255000  | 3.614012000  |
| H  | -1.402516000 | 2.197851000  | 4.397705000  |
| H  | -3.948294000 | -0.750915000 | 2.534137000  |
| H  | -3.546916000 | 0.888511000  | 4.387437000  |
| N  | -0.904817000 | 0.370626000  | 1.621958000  |
| C  | -2.144604000 | -1.377839000 | 0.513300000  |
| H  | -1.621838000 | -2.281559000 | 0.836917000  |
| H  | -3.181131000 | -1.632893000 | 0.274114000  |
| Cl | -6.147920000 | -0.825864000 | 0.134750000  |
| O  | -7.542307000 | -0.774809000 | -0.395218000 |
| O  | -5.493260000 | 0.512340000  | -0.034916000 |
| O  | -5.361061000 | -1.858409000 | -0.617744000 |
| O  | -6.174397000 | -1.186808000 | 1.589234000  |
| C  | 3.980638000  | -2.482351000 | 0.603791000  |
| C  | 4.378673000  | -2.564129000 | 1.954937000  |
| C  | 5.590482000  | -2.020857000 | 2.380106000  |
| C  | 6.437905000  | -1.381720000 | 1.469054000  |
| C  | 6.060340000  | -1.291328000 | 0.125510000  |
| C  | 4.847639000  | -1.831054000 | -0.298707000 |
| H  | 3.735752000  | -3.056599000 | 2.677816000  |
| H  | 5.876580000  | -2.098480000 | 3.425215000  |
| H  | 7.382719000  | -0.962476000 | 1.801967000  |
| H  | 6.713903000  | -0.803507000 | -0.592099000 |
| H  | 4.564151000  | -1.761538000 | -1.345585000 |
| C  | 2.681197000  | -3.011757000 | 0.131418000  |
| H  | 1.782190000  | -2.125197000 | 0.425603000  |
| H  | 2.629092000  | -3.043941000 | -0.960608000 |
| C  | 2.124784000  | -4.273361000 | 0.773141000  |
| H  | 1.152334000  | -4.527435000 | 0.341948000  |
| H  | 2.796398000  | -5.126218000 | 0.609644000  |
| H  | 1.987850000  | -4.163085000 | 1.852994000  |

### <sup>3</sup>H

Zero-point correction= 0.571934 (Hartree/Particle)  
 Thermal correction to Energy= 0.612361  
 Thermal correction to Enthalpy= 0.613305  
 Thermal correction to Gibbs Free Energy= 0.489888  
 Sum of electronic and zero-point Energies= -2507.307697  
 Sum of electronic and thermal Energies= -2507.267271  
 Sum of electronic and thermal Enthalpies= -2507.266327  
 Sum of electronic and thermal Free Energies= -2507.389744

|    |              |              |              |
|----|--------------|--------------|--------------|
| Fe | -0.238503000 | 0.104532000  | -0.031224000 |
| O  | -0.844754000 | -1.409035000 | -0.863903000 |
| N  | 0.455135000  | 1.687054000  | 0.840815000  |
| C  | -0.353667000 | 2.813978000  | 0.772677000  |
| C  | -1.541411000 | 2.606885000  | 0.002328000  |
| C  | -0.144761000 | 4.070736000  | 1.333698000  |
| C  | -2.487611000 | 3.649070000  | -0.200972000 |
| C  | -1.091286000 | 5.102989000  | 1.134578000  |
| H  | 0.748681000  | 4.244515000  | 1.917043000  |
| C  | -2.792427000 | 1.102550000  | -1.274995000 |
| C  | -3.625879000 | 3.343678000  | -0.990783000 |
| C  | -2.237289000 | 4.915401000  | 0.388814000  |
| H  | -0.899583000 | 6.072241000  | 1.585482000  |
| C  | -3.775380000 | 2.082035000  | -1.525274000 |
| H  | -2.878858000 | 0.101292000  | -1.682237000 |
| H  | -4.371897000 | 4.112741000  | -1.168254000 |
| H  | -2.950614000 | 5.720309000  | 0.243320000  |
| H  | -4.635410000 | 1.820851000  | -2.130419000 |
| N  | -1.719198000 | 1.353954000  | -0.534411000 |
| C  | 1.633673000  | 1.591328000  | 1.497544000  |
| O  | 2.224110000  | 2.474184000  | 2.129475000  |
| C  | 2.247901000  | 0.189932000  | 1.412012000  |
| H  | 3.220701000  | 0.268523000  | 0.917594000  |

|    |              |              |              |
|----|--------------|--------------|--------------|
| N  | 1.393784000  | -0.820444000 | 0.687274000  |
| C  | -0.314436000 | -1.364437000 | 2.365674000  |
| C  | -2.201375000 | 0.001160000  | 2.299742000  |
| C  | -0.654510000 | -1.828069000 | 3.633926000  |
| C  | -2.609448000 | -0.430980000 | 3.557103000  |
| H  | -2.776444000 | 0.727611000  | 1.740039000  |
| C  | -1.820681000 | -1.358272000 | 4.236841000  |
| H  | -0.013183000 | -2.544910000 | 4.134392000  |
| H  | -3.522567000 | -0.038402000 | 3.989069000  |
| H  | -2.105251000 | -1.707337000 | 5.223926000  |
| N  | -1.080902000 | -0.456725000 | 1.716091000  |
| C  | 0.876543000  | -1.881055000 | 1.596394000  |
| H  | 0.537588000  | -2.709811000 | 0.969497000  |
| H  | 1.658871000  | -2.251095000 | 2.266080000  |
| H  | 2.441877000  | -0.157845000 | 2.430282000  |
| C  | 0.789230000  | 1.349282000  | -2.575881000 |
| C  | 2.051833000  | -0.353321000 | -1.608106000 |
| C  | 1.713962000  | 1.506049000  | -3.603028000 |
| H  | -0.103925000 | 1.959132000  | -2.520241000 |
| C  | 3.031752000  | -0.235379000 | -2.590652000 |
| C  | 2.854848000  | 0.704040000  | -3.606315000 |
| H  | 1.541292000  | 2.249713000  | -4.372295000 |
| H  | 3.921831000  | -0.853271000 | -2.540127000 |
| H  | 3.603331000  | 0.814568000  | -4.384181000 |
| N  | 0.955306000  | 0.437630000  | -1.604280000 |
| C  | 2.097001000  | -1.378450000 | -0.504397000 |
| H  | 1.535207000  | -2.256588000 | -0.831590000 |
| H  | 3.119631000  | -1.678830000 | -0.257398000 |
| Cl | 6.111149000  | -0.932603000 | -0.099824000 |
| O  | 7.501534000  | -0.904806000 | 0.442761000  |
| O  | 5.491156000  | 0.426491000  | 0.029840000  |
| O  | 5.290442000  | -1.924718000 | 0.670537000  |
| O  | 6.141701000  | -1.330804000 | -1.544302000 |
| C  | -4.157292000 | -2.894307000 | -0.479977000 |
| C  | -4.079297000 | -2.815971000 | -1.903701000 |
| C  | -4.922066000 | -1.975668000 | -2.621763000 |
| C  | -5.872631000 | -1.181912000 | -1.963305000 |
| C  | -5.965905000 | -1.237141000 | -0.563196000 |
| C  | -5.129721000 | -2.070296000 | 0.164576000  |
| H  | -3.354004000 | -3.425692000 | -2.432973000 |
| H  | -4.845371000 | -1.939155000 | -3.705016000 |
| H  | -6.533033000 | -0.533878000 | -2.531405000 |
| H  | -6.699652000 | -0.625584000 | -0.045478000 |
| H  | -5.209636000 | -2.109066000 | 1.247943000  |
| C  | -3.321110000 | -3.745334000 | 0.286107000  |
| H  | -1.757917000 | -1.595318000 | -0.602558000 |
| H  | -3.448840000 | -3.724663000 | 1.365651000  |
| C  | -2.269222000 | -4.646880000 | -0.280651000 |
| H  | -1.862405000 | -5.306924000 | 0.489280000  |
| H  | -2.655758000 | -5.276273000 | -1.093125000 |
| H  | -1.431534000 | -4.071050000 | -0.701252000 |

### <sup>5</sup>TS

Zero-point correction= 0.565533 (Hartree/Particle)  
 Thermal correction to Energy= 0.606077  
 Thermal correction to Enthalpy= 0.607021  
 Thermal correction to Gibbs Free Energy= 0.481180  
 Sum of electronic and zero-point Energies= -2507.273648  
 Sum of electronic and thermal Energies= -2507.233104  
 Sum of electronic and thermal Enthalpies= -2507.232160  
 Sum of electronic and thermal Free Energies= -2507.358001

|    |              |              |              |
|----|--------------|--------------|--------------|
| Fe | -1.111903000 | -0.331698000 | -0.197343000 |
| O  | -0.896731000 | -1.878363000 | -0.917929000 |
| N  | -1.532443000 | 1.527859000  | 0.611682000  |
| C  | -2.805684000 | 2.035705000  | 0.383761000  |
| C  | -3.648786000 | 1.170276000  | -0.389226000 |
| C  | -3.345376000 | 3.251263000  | 0.804142000  |

|    |              |              |              |
|----|--------------|--------------|--------------|
| C  | -4.987226000 | 1.530237000  | -0.718033000 |
| C  | -4.674695000 | 3.604954000  | 0.474506000  |
| H  | -2.729539000 | 3.920035000  | 1.387871000  |
| C  | -3.844038000 | -0.871018000 | -1.519290000 |
| C  | -5.738177000 | 0.604787000  | -1.484601000 |
| C  | -5.491231000 | 2.777867000  | -0.267222000 |
| H  | -5.054426000 | 4.561306000  | 0.822395000  |
| C  | -5.173041000 | -0.589670000 | -1.884064000 |
| H  | -3.352847000 | -1.794290000 | -1.807436000 |
| H  | -6.762415000 | 0.847791000  | -1.752579000 |
| H  | -6.509710000 | 3.061575000  | -0.512531000 |
| H  | -5.730198000 | -1.311085000 | -2.470425000 |
| N  | -3.114089000 | -0.022083000 | -0.800551000 |
| C  | -0.578868000 | 2.172496000  | 1.324932000  |
| O  | -0.658430000 | 3.275592000  | 1.881780000  |
| C  | 0.757883000  | 1.424283000  | 1.447853000  |
| H  | 1.540958000  | 2.084632000  | 1.062444000  |
| N  | 0.845395000  | 0.090223000  | 0.774431000  |
| C  | -0.191557000 | -1.305923000 | 2.519387000  |
| C  | -2.510977000 | -1.446456000 | 2.435001000  |
| C  | -0.178086000 | -1.758754000 | 3.838173000  |
| C  | -2.577442000 | -1.915501000 | 3.743265000  |
| H  | -3.406430000 | -1.296789000 | 1.840618000  |
| C  | -1.388142000 | -2.072159000 | 4.456019000  |
| H  | 0.764305000  | -1.860976000 | 4.365109000  |
| H  | -3.539030000 | -2.143396000 | 4.188611000  |
| H  | -1.402504000 | -2.426992000 | 5.481369000  |
| N  | -1.343719000 | -1.152843000 | 1.841517000  |
| C  | 1.070572000  | -1.010263000 | 1.742026000  |
| H  | 1.341301000  | -1.907472000 | 1.175179000  |
| H  | 1.901656000  | -0.783210000 | 2.419881000  |
| H  | 0.958021000  | 1.305902000  | 2.517077000  |
| C  | -0.513362000 | 1.305423000  | -2.844758000 |
| C  | 1.340775000  | 0.836266000  | -1.520081000 |
| C  | 0.257360000  | 2.032290000  | -3.746532000 |
| H  | -1.582928000 | 1.183759000  | -2.981674000 |
| C  | 2.175371000  | 1.567912000  | -2.365033000 |
| C  | 1.623502000  | 2.168098000  | -3.496621000 |
| H  | -0.208589000 | 2.486777000  | -4.613362000 |
| H  | 3.228048000  | 1.675297000  | -2.124292000 |
| H  | 2.251235000  | 2.742515000  | -4.170330000 |
| N  | 0.021121000  | 0.722104000  | -1.760793000 |
| C  | 1.854524000  | 0.081127000  | -0.316299000 |
| H  | 2.014671000  | -0.961336000 | -0.612590000 |
| H  | 2.812029000  | 0.486110000  | 0.028259000  |
| Cl | 4.740726000  | 2.878260000  | 0.499652000  |
| O  | 5.797162000  | 3.707182000  | 1.152541000  |
| O  | 3.444581000  | 3.630442000  | 0.487309000  |
| O  | 4.564046000  | 1.598282000  | 1.261658000  |
| O  | 5.148073000  | 2.563308000  | -0.908496000 |
| C  | 1.324982000  | -4.265379000 | -1.163105000 |
| C  | 1.641878000  | -4.790221000 | 0.107227000  |
| C  | 2.959810000  | -4.816489000 | 0.561916000  |
| C  | 3.992953000  | -4.313210000 | -0.235160000 |
| C  | 3.697087000  | -3.783950000 | -1.496228000 |
| C  | 2.381104000  | -3.758814000 | -1.951626000 |
| H  | 0.854366000  | -5.187906000 | 0.739140000  |
| H  | 3.182521000  | -5.232729000 | 1.540131000  |
| H  | 5.018272000  | -4.334897000 | 0.121597000  |
| H  | 4.493618000  | -3.396282000 | -2.124583000 |
| H  | 2.157391000  | -3.351430000 | -2.934381000 |
| C  | -0.065328000 | -4.176117000 | -1.662989000 |
| H  | -0.459088000 | -3.042763000 | -1.307550000 |
| H  | -0.096845000 | -4.073878000 | -2.752654000 |
| C  | -1.117332000 | -5.140152000 | -1.139902000 |
| H  | -2.091617000 | -4.916673000 | -1.583414000 |
| H  | -0.862355000 | -6.176541000 | -1.395934000 |

|   |              |              |              |
|---|--------------|--------------|--------------|
| H | -1.226951000 | -5.085114000 | -0.052658000 |
|---|--------------|--------------|--------------|

### 5H

Zero-point correction= 0.567938 (Hartree/Particle)  
 Thermal correction to Energy= 0.609952  
 Thermal correction to Enthalpy= 0.610896  
 Thermal correction to Gibbs Free Energy= 0.481901  
 Sum of electronic and zero-point Energies= -2507.298722  
 Sum of electronic and thermal Energies= -2507.256708  
 Sum of electronic and thermal Enthalpies= -2507.255764  
 Sum of electronic and thermal Free Energies= -2507.384759

|    |              |              |              |
|----|--------------|--------------|--------------|
| Fe | 0.899791000  | -0.305463000 | -0.487057000 |
| O  | 1.355927000  | 1.020623000  | -1.673784000 |
| N  | 0.581810000  | -1.858382000 | 0.857603000  |
| C  | 1.533886000  | -2.871757000 | 0.905697000  |
| C  | 2.611637000  | -2.709090000 | -0.027868000 |
| C  | 1.560653000  | -3.998899000 | 1.726850000  |
| C  | 3.669225000  | -3.658850000 | -0.119014000 |
| C  | 2.612922000  | -4.939681000 | 1.632211000  |
| H  | 0.761689000  | -4.144040000 | 2.439059000  |
| C  | 3.553589000  | -1.388875000 | -1.712307000 |
| C  | 4.686623000  | -3.406718000 | -1.072586000 |
| C  | 3.650505000  | -4.790657000 | 0.737119000  |
| H  | 2.592435000  | -5.803127000 | 2.290787000  |
| C  | 4.632104000  | -2.278812000 | -1.866825000 |
| H  | 3.464528000  | -0.486996000 | -2.309066000 |
| H  | 5.508108000  | -4.110907000 | -1.168928000 |
| H  | 4.451819000  | -5.520079000 | 0.674881000  |
| H  | 5.400330000  | -2.066998000 | -2.601466000 |
| N  | 2.582889000  | -1.600417000 | -0.827451000 |
| C  | -0.510036000 | -1.820830000 | 1.663541000  |
| O  | -0.833738000 | -2.626775000 | 2.544721000  |
| C  | -1.464746000 | -0.643942000 | 1.416334000  |
| H  | -2.414380000 | -1.067701000 | 1.074676000  |
| N  | -1.006609000 | 0.397739000  | 0.447061000  |
| C  | 0.603002000  | 1.621650000  | 1.864849000  |
| C  | 2.788621000  | 0.828291000  | 1.842261000  |
| C  | 0.829536000  | 2.311654000  | 3.055182000  |
| C  | 3.095891000  | 1.502629000  | 3.020135000  |
| H  | 3.525777000  | 0.217990000  | 1.330660000  |
| C  | 2.095183000  | 2.253902000  | 3.637742000  |
| H  | 0.027693000  | 2.881637000  | 3.511537000  |
| H  | 4.091437000  | 1.429360000  | 3.442460000  |
| H  | 2.295334000  | 2.783178000  | 4.563643000  |
| N  | 1.570947000  | 0.891439000  | 1.279938000  |
| C  | -0.706168000 | 1.688893000  | 1.114585000  |
| H  | -0.613297000 | 2.457241000  | 0.340065000  |
| H  | -1.522879000 | 1.989737000  | 1.780669000  |
| H  | -1.670820000 | -0.182862000 | 2.386895000  |
| C  | -0.467713000 | -2.097104000 | -2.704655000 |
| C  | -1.880544000 | -0.584984000 | -1.638097000 |
| C  | -1.514675000 | -2.611717000 | -3.461801000 |
| H  | 0.543442000  | -2.479215000 | -2.800162000 |
| C  | -2.984406000 | -1.065026000 | -2.342134000 |
| C  | -2.794110000 | -2.088363000 | -3.270612000 |
| H  | -1.328385000 | -3.408898000 | -4.172243000 |
| H  | -3.969827000 | -0.654766000 | -2.147686000 |
| H  | -3.637041000 | -2.478831000 | -3.831729000 |
| N  | -0.650507000 | -1.105704000 | -1.817178000 |
| C  | -1.967417000 | 0.575462000  | -0.674752000 |
| H  | -1.682691000 | 1.486198000  | -1.212346000 |
| H  | -2.988425000 | 0.707316000  | -0.301361000 |
| Cl | -5.674637000 | -0.543825000 | -0.602148000 |
| O  | -6.925070000 | -0.741724000 | 1.393599000  |
| O  | -4.790929000 | -1.745925000 | 0.745872000  |
| O  | -4.947909000 | 0.668587000  | 1.104416000  |
| O  | -6.020081000 | -0.349305000 | -0.843656000 |

|   |              |             |              |
|---|--------------|-------------|--------------|
| C | 1.667735000  | 4.479405000 | -1.130778000 |
| C | 1.422903000  | 4.998052000 | 0.175258000  |
| C | 0.168156000  | 5.477025000 | 0.531137000  |
| C | -0.891463000 | 5.460216000 | -0.387438000 |
| C | -0.675876000 | 4.957029000 | -1.680402000 |
| C | 0.573210000  | 4.478446000 | -2.047859000 |
| H | 2.229911000  | 5.023460000 | 0.900233000  |
| H | 0.009045000  | 5.870425000 | 1.531293000  |
| H | -1.869075000 | 5.836451000 | -0.102346000 |
| H | -1.489774000 | 4.945925000 | -2.399913000 |
| H | 0.733495000  | 4.092776000 | -3.051232000 |
| C | 2.933036000  | 3.977165000 | -1.532586000 |
| H | 1.886727000  | 1.792062000 | -1.421052000 |
| H | 3.034769000  | 3.667372000 | -2.570524000 |
| C | 4.161866000  | 3.956013000 | -0.678101000 |
| H | 4.934369000  | 3.321975000 | -1.120678000 |
| H | 4.594813000  | 4.961814000 | -0.563463000 |
| H | 3.961062000  | 3.586836000 | 0.334632000  |

**2+EB**

**<sup>3</sup>TS**

Zero-point correction= 0.641492 (Hartree/Particle)  
 Thermal correction to Energy= 0.684808  
 Thermal correction to Enthalpy= 0.685753  
 Thermal correction to Gibbs Free Energy= 0.558776  
 Sum of electronic and zero-point Energies= -2641.174191  
 Sum of electronic and thermal Energies= -2641.130874  
 Sum of electronic and thermal Enthalpies= -2641.129930  
 Sum of electronic and thermal Free Energies= -2641.256907

|    |              |              |              |
|----|--------------|--------------|--------------|
| Fe | 0.058482000  | -0.430023000 | -0.017453000 |
| N  | 0.344991000  | 1.311513000  | 0.866369000  |
| C  | -0.712729000 | 2.207860000  | 0.781963000  |
| C  | -1.814247000 | 1.710227000  | 0.022595000  |
| C  | -0.832075000 | 3.479417000  | 1.330898000  |
| C  | -2.992490000 | 2.478479000  | -0.194401000 |
| C  | -1.986686000 | 4.259114000  | 1.095803000  |
| H  | -0.017597000 | 3.875904000  | 1.921434000  |
| C  | -2.679673000 | -0.112323000 | -1.166592000 |
| C  | -4.051346000 | 1.846065000  | -0.891520000 |
| C  | -3.057342000 | 3.812302000  | 0.333932000  |
| H  | -2.015516000 | 5.256097000  | 1.521725000  |
| C  | -3.893840000 | 0.566381000  | -1.382302000 |
| H  | -2.510967000 | -1.114734000 | -1.540433000 |
| H  | -4.989251000 | 2.375204000  | -1.016402000 |
| H  | -4.691476000 | 0.063260000  | -1.916125000 |
| N  | -1.686762000 | 0.434035000  | -0.472927000 |
| C  | 1.505573000  | 1.525474000  | 1.514128000  |
| O  | 1.861910000  | 2.535876000  | 2.136275000  |
| C  | 2.453505000  | 0.325021000  | 1.437430000  |
| H  | 3.389950000  | 0.646997000  | 0.972899000  |
| N  | 1.897808000  | -0.858819000 | 0.681497000  |
| C  | 0.447108000  | -1.865576000 | 2.373848000  |
| C  | -1.720417000 | -1.015181000 | 2.374372000  |
| C  | 0.278180000  | -2.392004000 | 3.651782000  |
| C  | -1.963236000 | -1.523443000 | 3.646782000  |
| H  | -2.477276000 | -0.459817000 | 1.835120000  |
| C  | -0.946969000 | -2.223188000 | 4.296141000  |
| H  | 1.095356000  | -2.921351000 | 4.128899000  |
| H  | -2.928536000 | -1.364246000 | 4.113017000  |
| H  | -1.101476000 | -2.625003000 | 5.291960000  |
| N  | -0.543740000 | -1.187257000 | 1.749796000  |
| C  | 1.708925000  | -2.043435000 | 1.566050000  |
| H  | 1.590048000  | -2.918791000 | 0.922231000  |
| H  | 2.580548000  | -2.205164000 | 2.207411000  |
| H  | 2.696456000  | 0.018333000  | 2.458267000  |
| C  | 0.661674000  | 1.078265000  | -2.573218000 |

|    |              |              |              |
|----|--------------|--------------|--------------|
| C  | 2.371730000  | -0.176894000 | -1.612713000 |
| C  | 1.503607000  | 1.523057000  | -3.587790000 |
| H  | -0.374649000 | 1.388400000  | -2.521618000 |
| C  | 3.278401000  | 0.247059000  | -2.581324000 |
| C  | 2.833841000  | 1.105273000  | -3.587087000 |
| H  | 1.119011000  | 2.190325000  | -4.350440000 |
| H  | 4.312657000  | -0.076543000 | -2.530290000 |
| H  | 3.519750000  | 1.448765000  | -4.354608000 |
| N  | 1.087570000  | 0.246676000  | -1.609768000 |
| C  | 2.718180000  | -1.165803000 | -0.528698000 |
| H  | 2.432193000  | -2.163366000 | -0.872139000 |
| H  | 3.785822000  | -1.165033000 | -0.290464000 |
| O  | -0.141979000 | -1.934218000 | -0.884896000 |
| Cl | 6.479098000  | 0.304997000  | -0.149186000 |
| O  | 7.818362000  | 0.681613000  | 0.391562000  |
| O  | 5.514671000  | 1.434452000  | 0.056267000  |
| O  | 5.972136000  | -0.912517000 | 0.566388000  |
| O  | 6.592116000  | 0.007139000  | -1.613784000 |
| C  | -2.937131000 | -3.747874000 | -0.634430000 |
| C  | -3.305801000 | -3.910335000 | -1.986634000 |
| C  | -4.616038000 | -3.681850000 | -2.405509000 |
| C  | -5.593832000 | -3.285367000 | -1.487130000 |
| C  | -5.247182000 | -3.119719000 | -0.142376000 |
| C  | -3.937061000 | -3.344871000 | 0.275594000  |
| H  | -2.562175000 | -4.217615000 | -2.715356000 |
| H  | -4.876426000 | -3.815821000 | -3.451641000 |
| H  | -6.614276000 | -3.111374000 | -1.815318000 |
| H  | -5.999818000 | -2.818991000 | 0.580934000  |
| H  | -3.676953000 | -3.218861000 | 1.323277000  |
| C  | -1.545165000 | -3.938949000 | -0.168063000 |
| H  | -0.899741000 | -2.849160000 | -0.452870000 |
| H  | -1.483984000 | -3.969828000 | 0.923500000  |
| C  | -0.689786000 | -5.011418000 | -0.824651000 |
| H  | 0.316190000  | -5.017172000 | -0.395261000 |
| H  | -1.123886000 | -6.008244000 | -0.672655000 |
| H  | -0.586985000 | -4.856907000 | -1.902881000 |
| N  | -4.221415000 | 4.585641000  | 0.079336000  |
| C  | -4.532784000 | 5.619799000  | 1.062060000  |
| H  | -3.859166000 | 6.492040000  | 1.013060000  |
| H  | -5.550355000 | 5.979400000  | 0.880868000  |
| H  | -4.487675000 | 5.202043000  | 2.070729000  |
| C  | -4.321114000 | 5.107827000  | -1.291648000 |
| H  | -5.339442000 | 5.466994000  | -1.469504000 |
| H  | -3.623346000 | 5.943614000  | -1.466778000 |
| H  | -4.101773000 | 4.324675000  | -2.018991000 |

**<sup>3</sup>H**

Zero-point correction= 0.644748 (Hartree/Particle)  
 Thermal correction to Energy= 0.689426  
 Thermal correction to Enthalpy= 0.690370  
 Thermal correction to Gibbs Free Energy= 0.557607  
 Sum of electronic and zero-point Energies= -2641.202180  
 Sum of electronic and thermal Energies= -2641.157502  
 Sum of electronic and thermal Enthalpies= -2641.156557  
 Sum of electronic and thermal Free Energies= -2641.289321

|    |              |              |              |
|----|--------------|--------------|--------------|
| Fe | 0.058245000  | -0.311553000 | -0.056740000 |
| N  | 0.281765000  | 1.373835000  | 0.856996000  |
| C  | -0.807196000 | 2.238017000  | 0.796103000  |
| C  | -1.879162000 | 1.744114000  | -0.008665000 |
| C  | -0.973532000 | 3.476599000  | 1.402395000  |
| C  | -3.074525000 | 2.489396000  | -0.211083000 |
| C  | -2.145251000 | 4.234903000  | 1.181735000  |
| H  | -0.181233000 | 3.868119000  | 2.025611000  |
| C  | -2.673052000 | -0.043600000 | -1.292758000 |
| C  | -4.104030000 | 1.860343000  | -0.953467000 |
| C  | -3.187211000 | 3.795622000  | 0.377044000  |
| H  | -2.209983000 | 5.209280000  | 1.653233000  |



|    |              |              |              |
|----|--------------|--------------|--------------|
| C  | -3.902988000 | 0.608736000  | -1.498255000 |
| H  | -2.476544000 | -1.023561000 | -1.713426000 |
| H  | -5.055082000 | 2.367445000  | -1.069526000 |
| H  | -4.678170000 | 0.107922000  | -2.066064000 |
| N  | -1.705660000 | 0.495754000  | -0.559534000 |
| C  | 1.432646000  | 1.591616000  | 1.529305000  |
| O  | 1.751594000  | 2.590414000  | 2.185919000  |
| C  | 2.407501000  | 0.412691000  | 1.433909000  |
| H  | 3.332790000  | 0.762660000  | 0.966538000  |
| N  | 1.873056000  | -0.773553000 | 0.670437000  |
| C  | 0.360668000  | -1.805709000 | 2.306574000  |
| C  | -1.824831000 | -1.000109000 | 2.241633000  |
| C  | 0.147603000  | -2.375612000 | 3.559130000  |
| C  | -2.111301000 | -1.556723000 | 3.483686000  |
| H  | -2.570166000 | -0.442629000 | 1.688927000  |
| C  | -1.107153000 | -2.253370000 | 4.154824000  |
| H  | 0.954403000  | -2.904864000 | 4.053803000  |
| H  | -3.099895000 | -1.436055000 | 3.910933000  |
| H  | -1.294791000 | -2.690691000 | 5.129839000  |
| N  | -0.617445000 | -1.123911000 | 1.664934000  |
| C  | 1.655367000  | -1.958227000 | 1.546306000  |
| H  | 1.561985000  | -2.831143000 | 0.895378000  |
| H  | 2.501769000  | -2.117636000 | 2.221517000  |
| H  | 2.666664000  | 0.105155000  | 2.450702000  |
| C  | 0.731943000  | 1.228666000  | -2.555434000 |
| C  | 2.404502000  | -0.083776000 | -1.601310000 |
| C  | 1.589164000  | 1.660971000  | -3.561907000 |
| H  | -0.295639000 | 1.566454000  | -2.502350000 |
| C  | 3.325233000  | 0.325783000  | -2.562712000 |
| C  | 2.907343000  | 1.205642000  | -3.561071000 |
| H  | 1.226483000  | 2.347395000  | -4.318193000 |
| H  | 4.350922000  | -0.023208000 | -2.509415000 |
| H  | 3.605265000  | 1.538526000  | -4.322430000 |
| N  | 1.132271000  | 0.373731000  | -1.600827000 |
| C  | 2.717464000  | -1.085274000 | -0.519305000 |
| H  | 2.424456000  | -2.075588000 | -0.876160000 |
| H  | 3.780282000  | -1.098890000 | -0.260018000 |
| O  | -0.099088000 | -1.916416000 | -0.930513000 |
| Cl | 6.464846000  | 0.395307000  | -0.061409000 |
| O  | 7.789923000  | 0.783247000  | 0.506014000  |
| O  | 5.492172000  | 1.523586000  | 0.109332000  |
| O  | 5.946238000  | -0.816145000 | 0.655833000  |
| O  | 6.613244000  | 0.081779000  | -1.519430000 |
| C  | -2.846891000 | -4.311309000 | -0.486381000 |
| C  | -2.798827000 | -4.175700000 | -1.907118000 |
| C  | -3.854004000 | -3.603082000 | -2.607915000 |
| C  | -4.994891000 | -3.143036000 | -1.934371000 |
| C  | -5.064633000 | -3.261133000 | -0.536759000 |
| C  | -4.018145000 | -3.829459000 | 0.173762000  |
| H  | -1.927610000 | -4.531100000 | -2.448110000 |
| H  | -3.794201000 | -3.517392000 | -3.689468000 |
| H  | -5.818560000 | -2.703968000 | -2.488981000 |
| H  | -5.945201000 | -2.907743000 | -0.007458000 |
| H  | -4.080854000 | -3.919261000 | 1.255240000  |
| C  | -1.794187000 | -4.896720000 | 0.261446000  |
| H  | -0.933338000 | -2.347902000 | -0.697636000 |
| H  | -1.920116000 | -4.946280000 | 1.340198000  |
| C  | -0.522256000 | -5.425169000 | -0.324421000 |
| H  | 0.077010000  | -5.934762000 | 0.433905000  |
| H  | -0.705449000 | -6.136162000 | -1.141180000 |
| H  | 0.091215000  | -4.615088000 | -0.745734000 |
| N  | -4.366478000 | 4.547602000  | 0.136073000  |
| C  | -4.718791000 | 5.535083000  | 1.152474000  |
| H  | -4.068574000 | 6.426094000  | 1.145084000  |
| H  | -5.743352000 | 5.873560000  | 0.970406000  |
| H  | -4.675511000 | 5.080933000  | 2.145325000  |
| C  | -4.467613000 | 5.117142000  | -1.216077000 |

|   |              |             |              |
|---|--------------|-------------|--------------|
| H | -5.495199000 | 5.448851000 | -1.393582000 |
| H | -3.796282000 | 5.981532000 | -1.349892000 |
| H | -4.213248000 | 4.370325000 | -1.969514000 |

### \*TS

Zero-point correction= 0.638378 (Hartree/Particle)  
Thermal correction to Energy= 0.683144  
Thermal correction to Enthalpy= 0.684089  
Thermal correction to Gibbs Free Energy= 0.549856  
Sum of electronic and zero-point Energies= -2641.168281  
Sum of electronic and thermal Energies= -2641.123514  
Sum of electronic and thermal Enthalpies= -2641.122570  
Sum of electronic and thermal Free Energies= -2641.256802

|    |              |              |              |
|----|--------------|--------------|--------------|
| Fe | 0.467975000  | 0.707314000  | -0.161013000 |
| N  | 1.351095000  | -0.969825000 | 0.657795000  |
| C  | 2.717784000  | -1.124937000 | 0.442518000  |
| C  | 3.317705000  | -0.065868000 | -0.310459000 |
| C  | 3.552518000  | -2.163366000 | 0.845873000  |
| C  | 4.707228000  | -0.056629000 | -0.629135000 |
| C  | 4.937097000  | -2.141913000 | 0.566271000  |
| H  | 3.128249000  | -2.985227000 | 1.404891000  |
| C  | 2.958035000  | 1.923734000  | -1.498422000 |
| C  | 5.165486000  | 0.982450000  | -1.472386000 |
| C  | 5.547779000  | -1.112093000 | -0.133475000 |
| H  | 5.537502000  | -2.965112000 | 0.937692000  |
| C  | 4.301593000  | 1.972540000  | -1.901538000 |
| H  | 2.237763000  | 2.678142000  | -1.796574000 |
| H  | 6.200816000  | 0.978082000  | -1.794198000 |
| H  | 4.639141000  | 2.773300000  | -2.549250000 |
| N  | 2.486125000  | 0.934172000  | -0.743672000 |
| C  | 0.594001000  | -1.849141000 | 1.352720000  |
| O  | 0.955232000  | -2.900414000 | 1.900643000  |
| C  | -0.891971000 | -1.475504000 | 1.472552000  |
| H  | -1.477334000 | -2.321080000 | 1.098025000  |
| N  | -1.323843000 | -0.216922000 | 0.786642000  |
| C  | -0.724609000 | 1.411082000  | 2.535026000  |
| C  | 1.475316000  | 2.162188000  | 2.482212000  |
| C  | -0.878367000 | 1.848862000  | 3.850129000  |
| C  | 1.394567000  | 2.636984000  | 3.787627000  |
| H  | 2.387623000  | 2.253108000  | 1.901597000  |
| C  | 0.195452000  | 2.474539000  | 4.482398000  |
| H  | -1.821899000 | 1.699320000  | 4.363730000  |
| H  | 2.253994000  | 3.113888000  | 4.244658000  |
| H  | 0.099272000  | 2.823971000  | 5.505202000  |
| N  | 0.437404000  | 1.566762000  | 1.874852000  |
| C  | -1.849937000 | 0.787352000  | 1.741460000  |
| H  | -2.340267000 | 1.578111000  | 1.163513000  |
| H  | -2.601962000 | 0.350096000  | 2.408585000  |
| H  | -1.114174000 | -1.400189000 | 2.541475000  |
| C  | 0.359305000  | -1.041602000 | -2.807096000 |
| C  | -1.568534000 | -1.082031000 | -1.506248000 |
| C  | -0.173502000 | -1.958643000 | -3.707684000 |
| H  | 1.357430000  | -0.635500000 | -2.935243000 |
| C  | -2.162410000 | -2.020768000 | -2.350102000 |
| C  | -1.454112000 | -2.458758000 | -3.469059000 |
| H  | 0.409365000  | -2.276750000 | -4.564534000 |
| H  | -3.149596000 | -2.407903000 | -2.119159000 |
| H  | -1.893460000 | -3.188439000 | -4.141683000 |
| N  | -0.326527000 | -0.615785000 | -1.735257000 |
| C  | -2.282389000 | -0.483683000 | -0.316547000 |
| H  | -2.709906000 | 0.476565000  | -0.625480000 |
| H  | -3.103024000 | -1.126441000 | 0.019631000  |
| O  | -0.131549000 | 2.145231000  | -0.894354000 |
| Cl | -4.371458000 | -3.930292000 | 0.497931000  |
| O  | -5.190718000 | -4.985556000 | 1.164947000  |
| O  | -2.920911000 | -4.301129000 | 0.563399000  |
| O  | -4.579896000 | -2.617944000 | 1.193877000  |

|   |              |              |              |
|---|--------------|--------------|--------------|
| O | -4.789017000 | -3.801507000 | -0.936235000 |
| C | -2.922114000 | 3.811003000  | -1.239217000 |
| C | -3.403516000 | 4.245234000  | 0.013497000  |
| C | -4.687611000 | 3.910247000  | 0.441815000  |
| C | -5.520535000 | 3.128048000  | -0.364590000 |
| C | -5.058531000 | 2.684177000  | -1.608529000 |
| C | -3.776556000 | 3.019626000  | -2.037559000 |
| H | -2.773246000 | 4.855376000  | 0.652384000  |
| H | -5.040992000 | 4.262112000  | 1.406767000  |
| H | -6.519933000 | 2.868735000  | -0.028396000 |
| H | -5.700387000 | 2.081354000  | -2.244327000 |
| H | -3.424823000 | 2.676745000  | -3.007415000 |
| C | -1.549739000 | 4.104427000  | -1.709580000 |
| H | -0.864088000 | 3.129812000  | -1.320076000 |
| H | -1.463541000 | 3.997644000  | -2.795808000 |
| C | -0.820804000 | 5.331352000  | -1.187256000 |
| H | 0.187890000  | 5.381452000  | -1.606721000 |
| H | -1.347440000 | 6.251858000  | -1.470235000 |
| H | -0.727000000 | 5.325508000  | -0.097140000 |
| N | 6.936294000  | -1.067575000 | -0.419141000 |
| C | 7.693313000  | -0.062931000 | 0.342877000  |
| H | 7.848138000  | -0.372206000 | 1.389811000  |
| H | 8.673490000  | 0.081557000  | -0.121678000 |
| H | 7.170344000  | 0.894329000  | 0.345911000  |
| C | 7.631779000  | -2.351366000 | -0.436269000 |
| H | 8.619187000  | -2.207711000 | -0.885482000 |
| H | 7.783047000  | -2.783279000 | 0.567345000  |
| H | 7.075942000  | -3.069358000 | -1.044008000 |

### <sup>5</sup>H

Zero-point correction= 0.640737 (Hartree/Particle)  
 Thermal correction to Energy= 0.687098  
 Thermal correction to Enthalpy= 0.688042  
 Thermal correction to Gibbs Free Energy= 0.547600  
 Sum of electronic and zero-point Energies= -2641.193861  
 Sum of electronic and thermal Energies= -2641.147500  
 Sum of electronic and thermal Enthalpies= -2641.146556  
 Sum of electronic and thermal Free Energies= -2641.286998

|    |              |              |              |
|----|--------------|--------------|--------------|
| Fe | 0.443675000  | 0.613766000  | 0.572622000  |
| N  | 1.324944000  | -1.240515000 | 0.302989000  |
| C  | 2.646641000  | -1.268069000 | -0.135331000 |
| C  | 3.242545000  | 0.024315000  | -0.298292000 |
| C  | 3.440307000  | -2.370806000 | -0.440802000 |
| C  | 4.589449000  | 0.185919000  | -0.736329000 |
| C  | 4.786428000  | -2.219366000 | -0.839149000 |
| H  | 3.018213000  | -3.360515000 | -0.342395000 |
| C  | 2.907088000  | 2.340641000  | -0.232643000 |
| C  | 5.031996000  | 1.508256000  | -0.973033000 |
| C  | 5.398302000  | -0.980926000 | -0.967763000 |
| H  | 5.359035000  | -3.120715000 | -1.027326000 |
| C  | 4.201737000  | 2.583728000  | -0.717237000 |
| H  | 2.215338000  | 3.145529000  | -0.006597000 |
| H  | 6.024763000  | 1.665203000  | -1.379538000 |
| H  | 4.527355000  | 3.601941000  | -0.896115000 |
| N  | 2.445325000  | 1.106573000  | -0.044565000 |
| C  | 0.595407000  | -2.359441000 | 0.541201000  |
| O  | 0.948956000  | -3.539192000 | 0.416361000  |
| C  | -0.832226000 | -2.116042000 | 1.053782000  |
| H  | -1.514707000 | -2.697002000 | 0.425766000  |
| N  | -1.285758000 | -0.692838000 | 1.122011000  |
| C  | -0.469077000 | -0.099212000 | 3.373430000  |
| C  | 1.726669000  | 0.662712000  | 3.472361000  |
| C  | -0.476173000 | -0.358468000 | 4.743232000  |
| C  | 1.790676000  | 0.444418000  | 4.844674000  |
| H  | 2.574218000  | 1.055741000  | 2.920288000  |
| C  | 0.668480000  | -0.077854000 | 5.488699000  |
| H  | -1.362663000 | -0.771710000 | 5.211742000  |

|    |              |              |              |
|----|--------------|--------------|--------------|
| H  | 2.700560000  | 0.672411000  | 5.387741000  |
| H  | 0.685647000  | -0.270698000 | 6.556388000  |
| N  | 0.620456000  | 0.398967000  | 2.758165000  |
| C  | -1.683646000 | -0.297583000 | 2.495964000  |
| H  | -2.214383000 | 0.657747000  | 2.428401000  |
| H  | -2.371828000 | -1.026845000 | 2.938738000  |
| H  | -0.883081000 | -2.559615000 | 2.053080000  |
| C  | -0.051997000 | 0.432715000  | -2.587370000 |
| C  | -1.807427000 | -0.321982000 | -1.262063000 |
| C  | -0.706065000 | 0.047901000  | -3.753903000 |
| H  | 0.930538000  | 0.892856000  | -2.614839000 |
| C  | -2.515240000 | -0.758288000 | -2.382217000 |
| C  | -1.956012000 | -0.562808000 | -3.645572000 |
| H  | -0.237722000 | 0.213893000  | -4.717322000 |
| H  | -3.473282000 | -1.253031000 | -2.258115000 |
| H  | -2.486190000 | -0.891851000 | -4.533557000 |
| N  | -0.594906000 | 0.254371000  | -1.372514000 |
| C  | -2.364209000 | -0.403990000 | 0.139461000  |
| H  | -2.787400000 | 0.575510000  | 0.387731000  |
| H  | -3.167158000 | -1.145546000 | 0.207934000  |
| O  | -0.196435000 | 2.334656000  | 0.706436000  |
| Cl | -4.493820000 | -3.843245000 | -0.550834000 |
| O  | -5.308108000 | -5.085543000 | -0.399273000 |
| O  | -3.075054000 | -4.204979000 | -0.869475000 |
| O  | -4.530788000 | -3.059354000 | 0.727563000  |
| O  | -5.056256000 | -3.006232000 | -1.660572000 |
| C  | -2.641417000 | 4.221659000  | -1.014057000 |
| C  | -3.028733000 | 5.148123000  | -0.000677000 |
| C  | -4.258415000 | 5.039314000  | 0.635727000  |
| C  | -5.152549000 | 4.014035000  | 0.296131000  |
| C  | -4.798310000 | 3.092420000  | -0.701575000 |
| C  | -3.573561000 | 3.191341000  | -1.345272000 |
| H  | -2.354778000 | 5.952785000  | 0.274793000  |
| H  | -4.529282000 | 5.759167000  | 1.403162000  |
| H  | -6.111945000 | 3.935600000  | 0.798144000  |
| H  | -5.488018000 | 2.299183000  | -0.976119000 |
| H  | -3.309020000 | 2.477387000  | -2.120977000 |
| C  | -1.392095000 | 4.288570000  | -1.684579000 |
| H  | -0.588180000 | 2.790158000  | -0.056139000 |
| H  | -1.221977000 | 3.567088000  | -2.480990000 |
| C  | -0.350681000 | 5.343892000  | -1.479320000 |
| H  | 0.626462000  | 5.000474000  | -1.830661000 |
| H  | -0.588033000 | 6.260637000  | -2.041496000 |
| H  | -0.248706000 | 5.637223000  | -0.428931000 |
| N  | 6.749201000  | -0.809149000 | -1.354677000 |
| C  | 7.648946000  | -0.327290000 | -0.295401000 |
| H  | 7.905040000  | -1.127480000 | 0.418230000  |
| H  | 8.575320000  | 0.041506000  | -0.746064000 |
| H  | 7.188830000  | 0.489242000  | 0.262017000  |
| C  | 7.353846000  | -1.908068000 | -2.102016000 |
| H  | 8.297554000  | -1.559500000 | -2.532239000 |
| H  | 7.577612000  | -2.790956000 | -1.480122000 |
| H  | 6.693815000  | -2.213898000 | -2.917168000 |

### <sup>3</sup>+EB

#### <sup>3</sup>TS

Zero-point correction= 0.601171 (Hartree/Particle)  
 Thermal correction to Energy= 0.642995  
 Thermal correction to Enthalpy= 0.643939  
 Thermal correction to Gibbs Free Energy= 0.519857  
 Sum of electronic and zero-point Energies= -2621.770907  
 Sum of electronic and thermal Energies= -2621.729082  
 Sum of electronic and thermal Enthalpies= -2621.728138  
 Sum of electronic and thermal Free Energies= -2621.852221

|    |              |              |              |
|----|--------------|--------------|--------------|
| Fe | -0.067205000 | -0.319731000 | -0.014858000 |
| N  | 0.370412000  | 1.430395000  | 0.784779000  |
| C  | -0.603921000 | 2.413549000  | 0.644431000  |

|    |              |              |              |
|----|--------------|--------------|--------------|
| C  | -1.743413000 | 1.972282000  | -0.091105000 |
| C  | -0.603871000 | 3.724048000  | 1.106646000  |
| C  | -2.845885000 | 2.827290000  | -0.362579000 |
| C  | -1.695941000 | 4.588100000  | 0.853542000  |
| H  | 0.248824000  | 4.082622000  | 1.666619000  |
| C  | -2.742512000 | 0.201353000  | -1.251048000 |
| C  | -3.919642000 | 2.297264000  | -1.115514000 |
| C  | -2.801964000 | 4.167966000  | 0.134952000  |
| H  | -1.644655000 | 5.599610000  | 1.237687000  |
| C  | -3.865932000 | 0.991909000  | -1.560425000 |
| H  | -2.661652000 | -0.827198000 | -1.580865000 |
| H  | -4.773497000 | 2.927381000  | -1.337023000 |
| H  | -4.672650000 | 0.557964000  | -2.139137000 |
| N  | -1.724865000 | 0.672611000  | -0.537641000 |
| C  | 1.540679000  | 1.572944000  | 1.431693000  |
| O  | 1.982501000  | 2.578658000  | 2.006262000  |
| C  | 2.378015000  | 0.290700000  | 1.424743000  |
| H  | 3.340744000  | 0.503309000  | 0.951339000  |
| N  | 1.721494000  | -0.876215000 | 0.724839000  |
| C  | 0.173487000  | -1.663356000 | 2.447889000  |
| C  | -1.911357000 | -0.629072000 | 2.379986000  |
| C  | -0.052391000 | -2.110933000 | 3.746951000  |
| C  | -2.209095000 | -1.052261000 | 3.671678000  |
| H  | -2.612302000 | -0.037340000 | 1.805096000  |
| C  | -1.263603000 | -1.805345000 | 4.366721000  |
| H  | 0.711250000  | -2.685747000 | 4.258781000  |
| H  | -3.160987000 | -0.787585000 | 4.117081000  |
| H  | -1.461455000 | -2.143546000 | 5.378382000  |
| N  | -0.748585000 | -0.932119000 | 1.779736000  |
| C  | 1.421333000  | -1.991974000 | 1.666185000  |
| H  | 1.231079000  | -2.885738000 | 1.066221000  |
| H  | 2.269980000  | -2.196512000 | 2.325974000  |
| H  | 2.589548000  | 0.016233000  | 2.461668000  |
| C  | 0.689845000  | 0.997023000  | -2.636122000 |
| C  | 2.270125000  | -0.359753000 | -1.595554000 |
| C  | 1.575057000  | 1.308783000  | -3.663336000 |
| H  | -0.313288000 | 1.404158000  | -2.612034000 |
| C  | 3.217616000  | -0.072616000 | -2.575244000 |
| C  | 2.860433000  | 0.769643000  | -3.628141000 |
| H  | 1.258398000  | 1.968490000  | -4.462937000 |
| H  | 4.216540000  | -0.488456000 | -2.497115000 |
| H  | 3.579272000  | 1.007385000  | -4.405487000 |
| N  | 1.030800000  | 0.180069000  | -1.627319000 |
| C  | 2.517440000  | -1.318785000 | -0.459190000 |
| H  | 2.142591000  | -2.302229000 | -0.754380000 |
| H  | 3.579141000  | -1.403209000 | -0.209870000 |
| O  | -0.393446000 | -1.844279000 | -0.806002000 |
| Cl | 6.387431000  | -0.161132000 | -0.120980000 |
| O  | 7.750339000  | 0.144757000  | 0.405365000  |
| O  | 5.525259000  | 1.062257000  | -0.033468000 |
| O  | 5.768844000  | -1.259878000 | 0.692478000  |
| O  | 6.485729000  | -0.599429000 | -1.550980000 |
| O  | -3.891068000 | 4.928209000  | -0.159394000 |
| C  | -3.912688000 | 6.279107000  | 0.299550000  |
| H  | -3.082728000 | 6.855476000  | -0.124586000 |
| H  | -4.859012000 | 6.696648000  | -0.044374000 |
| H  | -3.867693000 | 6.327274000  | 1.393426000  |
| C  | -3.376439000 | -3.340167000 | -0.540163000 |
| C  | -3.732233000 | -3.532844000 | -1.891855000 |
| C  | -5.004054000 | -3.196445000 | -2.354090000 |
| C  | -5.955452000 | -2.659232000 | -1.480649000 |
| C  | -5.621048000 | -2.461203000 | -0.137230000 |
| C  | -4.348822000 | -2.793969000 | 0.323901000  |
| H  | -3.008670000 | -3.948788000 | -2.586036000 |
| H  | -5.255365000 | -3.356286000 | -3.398805000 |
| H  | -6.946410000 | -2.401412000 | -1.842331000 |
| H  | -6.354032000 | -2.051041000 | 0.551672000  |

|   |              |              |              |
|---|--------------|--------------|--------------|
| H | -4.098945000 | -2.641985000 | 1.370642000  |
| C | -2.020833000 | -3.647303000 | -0.030425000 |
| H | -1.257766000 | -2.648890000 | -0.353177000 |
| H | -1.983891000 | -3.625258000 | 1.062489000  |
| C | -1.270058000 | -4.836665000 | -0.609177000 |
| H | -0.277317000 | -4.921122000 | -0.157952000 |
| H | -1.807319000 | -5.773801000 | -0.413358000 |
| H | -1.134022000 | -4.753953000 | -1.691619000 |

### <sup>3</sup>H

Zero-point correction= 0.604316 (Hartree/Particle)  
 Thermal correction to Energy= 0.647523  
 Thermal correction to Enthalpy= 0.648467  
 Thermal correction to Gibbs Free Energy= 0.518561  
 Sum of electronic and zero-point Energies= -2621.799082  
 Sum of electronic and thermal Energies= -2621.755875  
 Sum of electronic and thermal Enthalpies= -2621.754931  
 Sum of electronic and thermal Free Energies= -2621.884836

|    |              |              |              |
|----|--------------|--------------|--------------|
| Fe | -0.063422000 | -0.195125000 | -0.069304000 |
| N  | 0.320736000  | 1.489486000  | 0.786845000  |
| C  | -0.677075000 | 2.456712000  | 0.681169000  |
| C  | -1.786471000 | 2.037183000  | -0.113117000 |
| C  | -0.717222000 | 3.734563000  | 1.223066000  |
| C  | -2.898462000 | 2.886435000  | -0.361269000 |
| C  | -1.819927000 | 4.591691000  | 0.993160000  |
| H  | 0.112908000  | 4.075196000  | 1.826607000  |
| C  | -2.719028000 | 0.322840000  | -1.401973000 |
| C  | -3.941471000 | 2.383544000  | -1.173515000 |
| C  | -2.896453000 | 4.194909000  | 0.218861000  |
| H  | -1.800240000 | 5.578237000  | 1.439846000  |
| C  | -3.850266000 | 1.108406000  | -1.694042000 |
| H  | -2.615608000 | -0.682714000 | -1.794734000 |
| H  | -4.802188000 | 3.009643000  | -1.379185000 |
| H  | -4.633571000 | 0.694987000  | -2.318072000 |
| N  | -1.728502000 | 0.766857000  | -0.635788000 |
| C  | 1.479441000  | 1.614514000  | 1.467015000  |
| O  | 1.890207000  | 2.599849000  | 2.093214000  |
| C  | 2.332128000  | 0.341458000  | 1.424973000  |
| H  | 3.289232000  | 0.578916000  | 0.951108000  |
| N  | 1.685088000  | -0.813751000 | 0.701832000  |
| C  | 0.055499000  | -1.619159000 | 2.352604000  |
| C  | -2.036933000 | -0.602611000 | 2.218704000  |
| C  | -0.230414000 | -2.113784000 | 3.622492000  |
| C  | -2.394747000 | -1.077676000 | 3.476045000  |
| H  | -2.715055000 | 0.003286000  | 1.631527000  |
| C  | -1.474442000 | -1.842950000 | 4.191186000  |
| H  | 0.512689000  | -2.700578000 | 4.150799000  |
| H  | -3.372161000 | -0.842184000 | 3.880651000  |
| H  | -1.718080000 | -2.219477000 | 5.179098000  |
| N  | -0.840299000 | -0.868714000 | 1.668728000  |
| C  | 1.336846000  | -1.933356000 | 1.620021000  |
| H  | 1.162107000  | -2.817857000 | 1.002225000  |
| H  | 2.154280000  | -2.151825000 | 2.314171000  |
| H  | 2.556150000  | 0.048782000  | 2.454466000  |
| C  | 0.798547000  | 1.173390000  | -2.611716000 |
| C  | 2.309664000  | -0.274173000 | -1.586734000 |
| C  | 1.707103000  | 1.471398000  | -3.621825000 |
| H  | -0.186683000 | 1.622138000  | -2.585926000 |
| C  | 3.278273000  | -0.004354000 | -2.550437000 |
| C  | 2.967747000  | 0.875962000  | -3.586738000 |
| H  | 1.428369000  | 2.163383000  | -4.408078000 |
| H  | 4.259138000  | -0.460493000 | -2.470227000 |
| H  | 3.704585000  | 1.101134000  | -4.350872000 |
| N  | 1.094376000  | 0.317127000  | -1.620758000 |
| C  | 2.503007000  | -1.259800000 | -0.463123000 |
| H  | 2.108685000  | -2.226491000 | -0.785497000 |
| H  | 3.555767000  | -1.376036000 | -0.189174000 |

|    |              |              |              |
|----|--------------|--------------|--------------|
| O  | -0.375864000 | -1.808571000 | -0.884874000 |
| Cl | 6.376234000  | -0.153071000 | -0.023440000 |
| O  | 7.730153000  | 0.147811000  | 0.528748000  |
| O  | 5.518494000  | 1.074759000  | 0.045910000  |
| O  | 5.737231000  | -1.247757000 | 0.779142000  |
| O  | 6.500698000  | -0.593617000 | -1.450634000 |
| O  | -3.992372000 | 4.949728000  | -0.059041000 |
| C  | -4.057542000 | 6.268446000  | 0.483117000  |
| H  | -3.229261000 | 6.887364000  | 0.120366000  |
| H  | -5.003091000 | 6.686745000  | 0.138188000  |
| H  | -4.044449000 | 6.247519000  | 1.578612000  |
| C  | -3.385871000 | -3.864460000 | -0.382008000 |
| C  | -3.255765000 | -3.812412000 | -1.803067000 |
| C  | -4.204336000 | -3.164207000 | -2.585852000 |
| C  | -5.315414000 | -2.543536000 | -1.996832000 |
| C  | -5.464253000 | -2.577603000 | -0.600832000 |
| C  | -4.524381000 | -3.220095000 | 0.190894000  |
| H  | -2.406759000 | -4.292352000 | -2.279325000 |
| H  | -4.084267000 | -3.144717000 | -3.665620000 |
| H  | -6.055987000 | -2.045187000 | -2.614873000 |
| H  | -6.322604000 | -2.099839000 | -0.136688000 |
| H  | -4.648045000 | -3.243781000 | 1.270576000  |
| C  | -2.442625000 | -4.521396000 | 0.447973000  |
| H  | -1.264519000 | -2.126675000 | -0.671616000 |
| H  | -2.624793000 | -4.499839000 | 1.519585000  |
| C  | -1.211232000 | -5.215526000 | -0.044055000 |
| H  | -0.699374000 | -5.732101000 | 0.771377000  |
| H  | -1.435968000 | -5.957441000 | -0.822262000 |
| H  | -0.499932000 | -4.503080000 | -0.487256000 |

**<sup>5</sup>TS**

Zero-point correction= 0.598047 (Hartree/Particle)  
 Thermal correction to Energy= 0.641320  
 Thermal correction to Enthalpy= 0.642264  
 Thermal correction to Gibbs Free Energy= 0.510732  
 Sum of electronic and zero-point Energies= -2621.765128  
 Sum of electronic and thermal Energies= -2621.721855  
 Sum of electronic and thermal Enthalpies= -2621.720911  
 Sum of electronic and thermal Free Energies= -2621.852443

|    |              |              |              |
|----|--------------|--------------|--------------|
| Fe | 0.647230000  | 0.692856000  | -0.162106000 |
| N  | 1.512305000  | -0.991838000 | 0.659219000  |
| C  | 2.880240000  | -1.159176000 | 0.448370000  |
| C  | 3.485597000  | -0.111391000 | -0.313580000 |
| C  | 3.710567000  | -2.191293000 | 0.875271000  |
| C  | 4.874053000  | -0.110680000 | -0.628337000 |
| C  | 5.092572000  | -2.208000000 | 0.571685000  |
| H  | 3.281660000  | -2.997359000 | 1.453320000  |
| C  | 3.170764000  | 1.913658000  | -1.450573000 |
| C  | 5.377341000  | 0.969325000  | -1.386497000 |
| C  | 5.682781000  | -1.196872000 | -0.164376000 |
| H  | 5.683466000  | -3.040724000 | 0.933435000  |
| C  | 4.529543000  | 1.981207000  | -1.798081000 |
| H  | 2.462365000  | 2.679727000  | -1.747661000 |
| H  | 6.431640000  | 0.991072000  | -1.638351000 |
| H  | 4.893056000  | 2.819592000  | -2.380645000 |
| N  | 2.671820000  | 0.906462000  | -0.736961000 |
| C  | 0.747268000  | -1.862277000 | 1.354446000  |
| O  | 1.099472000  | -2.914939000 | 1.906892000  |
| C  | -0.736495000 | -1.477998000 | 1.467691000  |
| H  | -1.326217000 | -2.318508000 | 1.088578000  |
| N  | -1.155487000 | -0.215098000 | 0.781343000  |
| C  | -0.544976000 | 1.405842000  | 2.532375000  |
| C  | 1.661622000  | 2.137135000  | 2.485181000  |
| C  | -0.697533000 | 1.843130000  | 3.847776000  |
| C  | 1.582471000  | 2.610843000  | 3.791108000  |
| H  | 2.575987000  | 2.220791000  | 1.906736000  |
| C  | 0.380533000  | 2.458242000  | 4.483190000  |

|    |              |              |              |
|----|--------------|--------------|--------------|
| H  | -1.643474000 | 1.701409000  | 4.359158000  |
| H  | 2.445232000  | 3.079341000  | 4.250548000  |
| H  | 0.285372000  | 2.807091000  | 5.506289000  |
| N  | 0.619728000  | 1.551934000  | 1.874747000  |
| C  | -1.674209000 | 0.793563000  | 1.735534000  |
| H  | -2.155304000 | 1.589509000  | 1.156945000  |
| H  | -2.432142000 | 0.363203000  | 2.400466000  |
| H  | -0.963927000 | -1.402615000 | 2.535520000  |
| C  | 0.526595000  | -1.047105000 | -2.811447000 |
| C  | -1.403591000 | -1.074243000 | -1.513584000 |
| C  | -0.012755000 | -1.957039000 | -3.715317000 |
| H  | 1.528400000  | -0.649217000 | -2.936809000 |
| C  | -2.004240000 | -2.005538000 | -2.360894000 |
| C  | -1.298023000 | -2.446671000 | -3.479920000 |
| H  | 0.568605000  | -2.277859000 | -4.572178000 |
| H  | -2.995135000 | -2.384688000 | -2.132615000 |
| H  | -1.742667000 | -3.170703000 | -4.155165000 |
| N  | -0.157202000 | -0.618361000 | -1.739472000 |
| C  | -2.114363000 | -0.472468000 | -0.323738000 |
| H  | -2.534012000 | 0.491608000  | -0.631622000 |
| H  | -2.940572000 | -1.109387000 | 0.009940000  |
| O  | 0.064765000  | 2.137435000  | -0.896199000 |
| Cl | -4.232990000 | -3.906171000 | 0.474798000  |
| O  | -5.059374000 | -4.957715000 | 1.138908000  |
| O  | -2.784413000 | -4.283813000 | 0.544974000  |
| O  | -4.437574000 | -2.593006000 | 1.170308000  |
| O  | -4.645168000 | -3.775223000 | -0.960731000 |
| C  | -2.702525000 | 3.843633000  | -1.225033000 |
| C  | -3.178969000 | 4.276634000  | 0.029950000  |
| C  | -4.467047000 | 3.954539000  | 0.456263000  |
| C  | -5.308993000 | 3.186687000  | -0.354519000 |
| C  | -4.852029000 | 2.744231000  | -1.600835000 |
| C  | -3.566114000 | 3.066880000  | -2.027863000 |
| H  | -2.541633000 | 4.875775000  | 0.672222000  |
| H  | -4.816429000 | 4.305293000  | 1.423075000  |
| H  | -6.311462000 | 2.937380000  | -0.019900000 |
| H  | -5.500858000 | 2.152555000  | -2.240022000 |
| H  | -3.218248000 | 2.725206000  | -2.999541000 |
| C  | -1.326569000 | 4.123221000  | -1.693638000 |
| H  | -0.653795000 | 3.137008000  | -1.312496000 |
| H  | -1.242257000 | 4.024076000  | -2.780745000 |
| C  | -0.582016000 | 5.336687000  | -1.161971000 |
| H  | 0.426794000  | 5.377822000  | -1.582144000 |
| H  | -1.097501000 | 6.265967000  | -1.436673000 |
| H  | -0.487185000 | 5.320578000  | -0.072038000 |
| O  | 6.996826000  | -1.126391000 | -0.504480000 |
| C  | 7.860318000  | -2.179624000 | -0.077236000 |
| H  | 7.546388000  | -3.142903000 | -0.494603000 |
| H  | 8.850985000  | -1.924919000 | -0.453691000 |
| H  | 7.890404000  | -2.248434000 | 1.015913000  |

**<sup>5</sup>H**

Zero-point correction= 0.602093 (Hartree/Particle)  
 Thermal correction to Energy= 0.646346  
 Thermal correction to Enthalpy= 0.647290  
 Thermal correction to Gibbs Free Energy= 0.512893  
 Sum of electronic and zero-point Energies= -2621.789536  
 Sum of electronic and thermal Energies= -2621.745283  
 Sum of electronic and thermal Enthalpies= -2621.744339  
 Sum of electronic and thermal Free Energies= -2621.878736

|    |             |              |              |
|----|-------------|--------------|--------------|
| Fe | 0.762640000 | 0.668257000  | 0.091080000  |
| N  | 1.558641000 | -1.007965000 | 0.558639000  |
| C  | 2.922762000 | -1.143849000 | 0.259209000  |
| C  | 3.490184000 | 0.018723000  | -0.336259000 |
| C  | 3.760749000 | -2.231551000 | 0.464231000  |
| C  | 4.857028000 | 0.089828000  | -0.714123000 |
| C  | 5.127255000 | -2.183955000 | 0.094326000  |

|    |              |              |              |
|----|--------------|--------------|--------------|
| H  | 3.359961000  | -3.128615000 | 0.914319000  |
| C  | 3.096398000  | 2.207432000  | -1.079414000 |
| C  | 5.312187000  | 1.295056000  | -1.294865000 |
| C  | 5.683840000  | -1.056745000 | -0.484258000 |
| H  | 5.733640000  | -3.062349000 | 0.277864000  |
| C  | 4.436850000  | 2.350844000  | -1.476955000 |
| H  | 2.360533000  | 2.996167000  | -1.197507000 |
| H  | 6.351199000  | 1.378285000  | -1.593298000 |
| H  | 4.766161000  | 3.283078000  | -1.920560000 |
| N  | 2.647491000  | 1.083070000  | -0.531331000 |
| C  | 0.794389000  | -1.967753000 | 1.144008000  |
| O  | 1.164196000  | -3.091067000 | 1.497766000  |
| C  | -0.665144000 | -1.565819000 | 1.374675000  |
| H  | -1.301505000 | -2.315284000 | 0.894296000  |
| N  | -1.045137000 | -0.190036000 | 0.900930000  |
| C  | -0.349070000 | 1.088157000  | 2.892343000  |
| C  | 1.894150000  | 1.683846000  | 2.933919000  |
| C  | -0.481980000 | 1.348325000  | 4.256125000  |
| C  | 1.840184000  | 1.978444000  | 4.292947000  |
| H  | 2.813725000  | 1.792220000  | 2.367586000  |
| C  | 0.629065000  | 1.804822000  | 4.964171000  |
| H  | -1.436630000 | 1.194717000  | 4.747655000  |
| H  | 2.727859000  | 2.327447000  | 4.808030000  |
| H  | 0.551837000  | 2.015509000  | 6.025844000  |
| N  | 0.821721000  | 1.251600000  | 2.253735000  |
| C  | -1.512029000 | 0.658055000  | 2.026174000  |
| H  | -1.986690000 | 1.551795000  | 1.606727000  |
| H  | -2.271572000 | 0.139292000  | 2.622236000  |
| H  | -0.854344000 | -1.646197000 | 2.449069000  |
| C  | 0.458266000  | -0.647932000 | -2.825894000 |
| C  | -1.429622000 | -0.726176000 | -1.475523000 |
| C  | -0.172467000 | -1.377281000 | -3.829359000 |
| H  | 1.483936000  | -0.308779000 | -2.931961000 |
| C  | -2.123686000 | -1.481724000 | -2.420870000 |
| C  | -1.483919000 | -1.804751000 | -3.617438000 |
| H  | 0.359070000  | -1.611694000 | -4.744659000 |
| H  | -3.131945000 | -1.821882000 | -2.208189000 |
| H  | -1.999626000 | -2.391279000 | -4.371057000 |
| N  | -0.160996000 | -0.330296000 | -1.679019000 |
| C  | -2.060419000 | -0.256086000 | -0.184983000 |
| H  | -2.455117000 | 0.753671000  | -0.341824000 |
| H  | -2.899072000 | -0.897550000 | 0.105319000  |
| O  | 0.207566000  | 2.327656000  | -0.424233000 |
| Cl | -4.235244000 | -3.679550000 | 0.289100000  |
| O  | -5.064477000 | -4.783643000 | 0.856797000  |
| O  | -2.811849000 | -4.131688000 | 0.161561000  |
| O  | -4.296021000 | -2.487131000 | 1.198136000  |
| O  | -4.760816000 | -3.298845000 | -1.061975000 |
| C  | -3.319383000 | 3.358530000  | -1.582741000 |
| C  | -2.700123000 | 4.099982000  | -0.530578000 |
| C  | -3.274203000 | 4.165085000  | 0.735264000  |
| C  | -4.479492000 | 3.502974000  | 1.009060000  |
| C  | -5.111421000 | 2.773486000  | -0.010912000 |
| C  | -4.549695000 | 2.701579000  | -1.277249000 |
| H  | -1.777519000 | 4.637169000  | -0.727336000 |
| H  | -2.785553000 | 4.742628000  | 1.515250000  |
| H  | -4.922917000 | 3.559161000  | 1.998269000  |
| H  | -6.047823000 | 2.261207000  | 0.191607000  |
| H  | -5.046397000 | 2.134592000  | -2.060406000 |
| C  | -2.754033000 | 3.257585000  | -2.878196000 |
| H  | -0.728790000 | 2.516071000  | -0.265536000 |
| H  | -3.307461000 | 2.686418000  | -3.619402000 |
| C  | -1.445462000 | 3.861957000  | -3.279340000 |
| H  | -1.192611000 | 3.604693000  | -4.310587000 |
| H  | -1.456374000 | 4.959266000  | -3.204773000 |
| H  | -0.629855000 | 3.513243000  | -2.629963000 |
| O  | 6.978021000  | -0.920883000 | -0.869826000 |

|   |             |              |              |
|---|-------------|--------------|--------------|
| C | 7.860491000 | -2.026793000 | -0.675040000 |
| H | 7.523472000 | -2.904774000 | -1.237071000 |
| H | 8.831034000 | -1.703365000 | -1.050782000 |
| H | 7.944984000 | -2.282764000 | 0.386840000  |

#### 4+EB

#### <sup>3</sup>TS

Zero-point correction= 0.571011 (Hartree/Particle)

Thermal correction to Energy= 0.612815

Thermal correction to Enthalpy= 0.613760

Thermal correction to Gibbs Free Energy= 0.487692

Sum of electronic and zero-point Energies= -2711.773670

Sum of electronic and thermal Energies= -2711.731865

Sum of electronic and thermal Enthalpies= -2711.730921

Sum of electronic and thermal Free Energies= -2711.856989

|    |              |              |              |
|----|--------------|--------------|--------------|
| Fe | 0.024371000  | -0.402322000 | -0.022183000 |
| N  | 0.371575000  | 1.364660000  | 0.796508000  |
| C  | -0.621756000 | 2.295902000  | 0.681467000  |
| C  | -1.771196000 | 1.822617000  | -0.047419000 |
| C  | -0.643697000 | 3.606284000  | 1.170108000  |
| C  | -2.919219000 | 2.630419000  | -0.291133000 |
| C  | -1.761453000 | 4.408899000  | 0.943288000  |
| H  | 0.205175000  | 3.984409000  | 1.720194000  |
| C  | -2.671478000 | 0.000846000  | -1.209432000 |
| C  | -3.963620000 | 2.029593000  | -1.047506000 |
| C  | -2.877167000 | 3.962563000  | 0.242740000  |
| H  | -1.775658000 | 5.421495000  | 1.324995000  |
| C  | -3.833493000 | 0.734121000  | -1.500024000 |
| H  | -2.532382000 | -1.018818000 | -1.546313000 |
| H  | -4.854052000 | 2.598455000  | -1.264214000 |
| H  | -4.621830000 | 0.266467000  | -2.078005000 |
| N  | -1.680887000 | 0.531790000  | -0.502249000 |
| C  | 1.558515000  | 1.548335000  | 1.438761000  |
| O  | 1.955744000  | 2.563143000  | 2.011565000  |
| C  | 2.444496000  | 0.302515000  | 1.407914000  |
| H  | 3.397802000  | 0.568733000  | 0.942060000  |
| N  | 1.841629000  | -0.880240000 | 0.688380000  |
| C  | 0.359315000  | -1.782461000 | 2.410845000  |
| C  | -1.773974000 | -0.850169000 | 2.385932000  |
| C  | 0.169371000  | -2.270090000 | 3.700950000  |
| C  | -2.037115000 | -1.317258000 | 3.669706000  |
| H  | -2.510502000 | -0.281301000 | 1.833024000  |
| C  | -1.048910000 | -2.038626000 | 4.338493000  |
| H  | 0.965475000  | -2.818114000 | 4.192163000  |
| H  | -2.996364000 | -1.110279000 | 4.129441000  |
| H  | -1.219673000 | -2.409285000 | 5.343632000  |
| N  | -0.603521000 | -1.081605000 | 1.767698000  |
| C  | 1.612716000  | -2.030318000 | 1.610005000  |
| H  | 1.464281000  | -2.920655000 | 0.993527000  |
| H  | 2.479612000  | -2.201556000 | 2.254942000  |
| H  | 2.664749000  | 0.023070000  | 2.441354000  |
| C  | 0.681474000  | 0.991185000  | -2.635712000 |
| C  | 2.341723000  | -0.293286000 | -1.628235000 |
| C  | 1.538660000  | 1.362269000  | -3.666648000 |
| H  | -0.341438000 | 1.344546000  | -2.599516000 |
| C  | 3.262942000  | 0.056765000  | -2.612289000 |
| C  | 2.851398000  | 0.892649000  | -3.650104000 |
| H  | 1.179039000  | 2.013970000  | -4.454440000 |
| H  | 4.283286000  | -0.305825000 | -2.548164000 |
| H  | 3.548975000  | 1.178858000  | -4.430397000 |
| N  | 1.075259000  | 0.181107000  | -1.640131000 |
| C  | 2.650526000  | -1.256703000 | -0.511552000 |
| H  | 2.327687000  | -2.254108000 | -0.821020000 |
| H  | 3.716668000  | -1.288045000 | -0.269564000 |
| O  | -0.253901000 | -1.911605000 | -0.847575000 |
| Cl | 6.410376000  | 0.140859000  | -0.122913000 |
| O  | 7.739452000  | 0.527441000  | 0.434561000  |

|   |              |              |              |
|---|--------------|--------------|--------------|
| O | 5.462235000  | 1.298713000  | -0.021094000 |
| O | 5.856246000  | -1.017527000 | 0.654111000  |
| O | 6.560282000  | -0.253825000 | -1.560577000 |
| N | -3.966502000 | 4.906569000  | 0.096523000  |
| O | -3.802159000 | 6.061931000  | 0.510989000  |
| O | -5.028167000 | 4.538175000  | -0.427564000 |
| C | -3.090483000 | -3.606623000 | -0.549367000 |
| C | -3.445572000 | -3.784034000 | -1.903274000 |
| C | -4.737631000 | -3.506138000 | -2.347706000 |
| C | -5.709263000 | -3.043855000 | -1.453809000 |
| C | -5.375419000 | -2.861659000 | -0.107990000 |
| C | -4.083237000 | -3.135992000 | 0.335631000  |
| H | -2.706056000 | -4.141859000 | -2.612781000 |
| H | -4.988770000 | -3.652740000 | -3.394326000 |
| H | -6.715633000 | -2.831159000 | -1.801941000 |
| H | -6.123951000 | -2.509470000 | 0.595984000  |
| H | -3.832802000 | -2.996896000 | 1.383974000  |
| C | -1.714968000 | -3.848539000 | -0.057478000 |
| H | -1.030291000 | -2.798481000 | -0.367924000 |
| H | -1.668757000 | -3.850033000 | 1.035245000  |
| C | -0.899440000 | -4.975305000 | -0.672490000 |
| H | 0.100021000  | -5.013153000 | -0.229839000 |
| H | -1.379782000 | -5.946605000 | -0.497071000 |
| H | -0.777838000 | -4.856789000 | -1.753194000 |

### <sup>3</sup>H

Zero-point correction= 0.574048 (Hartree/Particle)  
 Thermal correction to Energy= 0.617296  
 Thermal correction to Enthalpy= 0.618240  
 Thermal correction to Gibbs Free Energy= 0.486429  
 Sum of electronic and zero-point Energies= -2711.800973  
 Sum of electronic and thermal Energies= -2711.757725  
 Sum of electronic and thermal Enthalpies= -2711.756781  
 Sum of electronic and thermal Free Energies= -2711.888592

|    |              |              |              |
|----|--------------|--------------|--------------|
| Fe | 0.028130000  | -0.304186000 | -0.046639000 |
| N  | 0.333517000  | 1.427900000  | 0.782020000  |
| C  | -0.685847000 | 2.336467000  | 0.683014000  |
| C  | -1.815732000 | 1.856634000  | -0.072425000 |
| C  | -0.741833000 | 3.630780000  | 1.206548000  |
| C  | -2.978242000 | 2.646062000  | -0.306654000 |
| C  | -1.875174000 | 4.415464000  | 0.988774000  |
| H  | 0.092735000  | 4.012487000  | 1.775867000  |
| C  | -2.663147000 | 0.049974000  | -1.294703000 |
| C  | -3.998769000 | 2.046514000  | -1.095934000 |
| C  | -2.971890000 | 3.962968000  | 0.264529000  |
| H  | -1.916150000 | 5.416504000  | 1.398094000  |
| C  | -3.835875000 | 0.767289000  | -1.582606000 |
| H  | -2.503219000 | -0.957529000 | -1.661065000 |
| H  | -4.897640000 | 2.603075000  | -1.310082000 |
| H  | -4.606047000 | 0.300169000  | -2.184689000 |
| N  | -1.691943000 | 0.580530000  | -0.561895000 |
| C  | 1.514839000  | 1.618953000  | 1.437324000  |
| O  | 1.888727000  | 2.633126000  | 2.024836000  |
| C  | 2.417123000  | 0.383304000  | 1.404066000  |
| H  | 3.363865000  | 0.661558000  | 0.931430000  |
| N  | 1.824486000  | -0.807287000 | 0.691672000  |
| C  | 0.287045000  | -1.705035000 | 2.380225000  |
| C  | -1.861674000 | -0.807959000 | 2.294870000  |
| C  | 0.061015000  | -2.209986000 | 3.657818000  |
| C  | -2.160764000 | -1.297254000 | 3.561675000  |
| H  | -2.588936000 | -0.244899000 | 1.724364000  |
| C  | -1.181844000 | -2.007013000 | 4.256073000  |
| H  | 0.848769000  | -2.751733000 | 4.169115000  |
| H  | -3.139608000 | -1.115482000 | 3.989536000  |
| H  | -1.379784000 | -2.392658000 | 5.250576000  |
| N  | -0.665416000 | -1.008661000 | 1.715234000  |
| C  | 1.565695000  | -1.946675000 | 1.617617000  |

|    |              |              |              |
|----|--------------|--------------|--------------|
| H  | 1.430157000  | -2.840285000 | 1.003039000  |
| H  | 2.412318000  | -2.114249000 | 2.290018000  |
| H  | 2.649457000  | 0.112107000  | 2.437206000  |
| C  | 0.745716000  | 1.084218000  | -2.626239000 |
| C  | 2.369549000  | -0.244608000 | -1.614136000 |
| C  | 1.612833000  | 1.428200000  | -3.657693000 |
| H  | -0.266531000 | 1.466949000  | -2.589259000 |
| C  | 3.299855000  | 0.076823000  | -2.599305000 |
| C  | 2.911567000  | 0.920475000  | -3.639699000 |
| H  | 1.272585000  | 2.088599000  | -4.446791000 |
| H  | 4.310365000  | -0.311513000 | -2.532210000 |
| H  | 3.617027000  | 1.184861000  | -4.420613000 |
| N  | 1.116904000  | 0.264101000  | -1.629627000 |
| C  | 2.649124000  | -1.205173000 | -0.488125000 |
| H  | 2.316058000  | -2.199005000 | -0.796400000 |
| H  | 3.711049000  | -1.248408000 | -0.229554000 |
| O  | -0.219655000 | -1.915453000 | -0.857360000 |
| Cl | 6.403794000  | 0.195496000  | -0.063025000 |
| O  | 7.728134000  | 0.590676000  | 0.499983000  |
| O  | 5.459418000  | 1.359192000  | 0.000670000  |
| O  | 5.836805000  | -0.941935000 | 0.735122000  |
| O  | 6.568590000  | -0.233957000 | -1.489000000 |
| N  | -4.083336000 | 4.885306000  | 0.133670000  |
| O  | -3.937443000 | 6.041983000  | 0.549629000  |
| O  | -5.142975000 | 4.494501000  | -0.376920000 |
| C  | -3.069991000 | -4.095615000 | -0.413682000 |
| C  | -3.090952000 | -4.058887000 | -1.841078000 |
| C  | -4.133557000 | -3.446343000 | -2.526073000 |
| C  | -5.193976000 | -2.847851000 | -1.829718000 |
| C  | -5.193871000 | -2.865468000 | -0.425575000 |
| C  | -4.158291000 | -3.471706000 | 0.269550000  |
| H  | -2.282244000 | -4.520162000 | -2.398879000 |
| H  | -4.127678000 | -3.436974000 | -3.612555000 |
| H  | -6.009511000 | -2.378915000 | -2.371739000 |
| H  | -6.011439000 | -2.404010000 | 0.121223000  |
| H  | -4.166663000 | -3.483284000 | 1.356403000  |
| C  | -2.029067000 | -4.719107000 | 0.320218000  |
| H  | -1.019522000 | -2.346465000 | -0.521258000 |
| H  | -2.096573000 | -4.682393000 | 1.404761000  |
| C  | -0.847250000 | -5.408991000 | -0.286910000 |
| H  | -0.277464000 | -5.949973000 | -0.472443000 |
| H  | -1.140233000 | -6.127476000 | -1.063510000 |
| H  | -0.162996000 | -4.692495000 | -0.765122000 |

### <sup>5</sup>TS

Zero-point correction= 0.568007 (Hartree/Particle)  
 Thermal correction to Energy= 0.611242  
 Thermal correction to Enthalpy= 0.612186  
 Thermal correction to Gibbs Free Energy= 0.479493  
 Sum of electronic and zero-point Energies= -2711.766945  
 Sum of electronic and thermal Energies= -2711.723711  
 Sum of electronic and thermal Enthalpies= -2711.722767  
 Sum of electronic and thermal Free Energies= -2711.855460

|    |             |              |              |
|----|-------------|--------------|--------------|
| Fe | 0.488718000 | 0.718903000  | -0.142357000 |
| N  | 1.407244000 | -0.948638000 | 0.705133000  |
| C  | 2.757275000 | -1.086876000 | 0.519535000  |
| C  | 3.369246000 | -0.031044000 | -0.258318000 |
| C  | 3.591014000 | -2.109595000 | 0.987155000  |
| C  | 4.762121000 | -0.004052000 | -0.564723000 |
| C  | 4.956099000 | -2.094042000 | 0.698172000  |
| H  | 3.165666000 | -2.912036000 | 1.570149000  |
| C  | 2.984064000 | 1.979604000  | -1.398844000 |
| C  | 5.222782000 | 1.109241000  | -1.319783000 |
| C  | 5.549617000 | -1.090892000 | -0.056629000 |
| H  | 5.585961000 | -2.894457000 | 1.064480000  |
| C  | 4.341917000 | 2.088424000  | -1.730404000 |
| H  | 2.250325000 | 2.718745000  | -1.700959000 |

|    |             |             |             |
|----|-------------|-------------|-------------|
| H  | 6.27038000  | 1.17898800  | -1.56834800 |
| H  | 4.68764700  | 2.93941200  | -2.30561400 |
| N  | 2.52564800  | 0.95545800  | -0.68666700 |
| C  | 0.64127100  | -1.83164100 | 1.41127700  |
| O  | 1.01237600  | -2.85814800 | 1.98453600  |
| C  | -0.85117400 | -1.48146100 | 1.48613100  |
| H  | -1.40686400 | -2.33959200 | 1.09473700  |
| N  | -1.28816000 | -0.23239200 | 0.78746500  |
| C  | -0.73248700 | 1.41360200  | 2.53312700  |
| C  | 1.45890500  | 2.19314700  | 2.50062100  |
| C  | -0.90839700 | 1.86182100  | 3.84161200  |
| C  | 1.35488100  | 2.67866800  | 3.80010600  |
| H  | 2.37741800  | 2.29249400  | 1.93169800  |
| C  | 0.14931400  | 2.50698700  | 4.48125100  |
| H  | -1.85650000 | 1.70518600  | 4.34440100  |
| H  | 2.20217700  | 3.17112200  | 4.26306900  |
| H  | 0.03572400  | 2.86470000  | 5.49932600  |
| N  | 0.43638100  | 1.57769800  | 1.88611600  |
| C  | -1.84027000 | 0.76977800  | 1.73151700  |
| H  | -2.33602400 | 1.54961100  | 1.14368500  |
| H  | -2.59273400 | 0.32377300  | 2.39175300  |
| H  | -1.10454400 | -1.41258900 | 2.54823600  |
| C  | 0.46284800  | -1.03782600 | -2.77625000 |
| C  | -1.48679700 | -1.10514600 | -1.50689000 |
| C  | -0.04544200 | -1.95617600 | -3.68892200 |
| H  | 1.45781100  | -0.61985000 | -2.88788300 |
| C  | -2.05603200 | -2.04592300 | -2.36490000 |
| C  | -1.32444100 | -2.47087500 | -3.47363600 |
| H  | 0.55471000  | -2.26377800 | -4.53752200 |
| H  | -3.04257000 | -2.44484800 | -2.15298100 |
| H  | -1.74481800 | -3.20184900 | -4.15679200 |
| N  | -0.24555900 | -0.62516500 | -1.71328800 |
| C  | -2.22810800 | -0.51851400 | -0.32843900 |
| H  | -2.66913700 | 0.43335000  | -0.64380800 |
| H  | -3.04022100 | -1.17579200 | -0.00064700 |
| O  | -0.12417000 | 2.13602800  | -0.88540100 |
| Cl | -4.18300400 | -4.01938400 | 0.42182700  |
| O  | -4.90684000 | -5.13526400 | 1.09936400  |
| O  | -2.70799000 | -4.28779500 | 0.44257900  |
| O  | -4.46086900 | -2.73095000 | 1.13815700  |
| O  | -4.64774400 | -3.90652200 | -0.99874100 |
| N  | 6.97336200  | -1.21885800 | -0.29640000 |
| O  | 7.59348200  | -2.09939800 | 0.31430000  |
| O  | 7.52742300  | -0.46077500 | -1.10611200 |
| C  | -2.92103500 | 3.80010600  | -1.24570800 |
| C  | -3.40922500 | 4.23086500  | 0.00565400  |
| C  | -4.69272100 | 3.88794700  | 0.42846500  |
| C  | -5.51716800 | 3.10059500  | -0.38202200 |
| C  | -5.04786300 | 2.65944100  | -1.62428400 |
| C  | -3.76645100 | 3.00285100  | -2.04799400 |
| H  | -2.78494300 | 4.84427900  | 0.64718000  |
| H  | -5.05252500 | 4.23704100  | 1.39195200  |
| H  | -6.51615800 | 2.83480800  | -0.04977500 |
| H  | -5.68354700 | 2.05265500  | -2.26236100 |
| H  | -3.40821300 | 2.66229600  | -3.01620900 |
| C  | -1.54854000 | 4.10307800  | -1.71147400 |
| H  | -0.86669900 | 3.14325200  | -1.32454900 |
| H  | -1.45977200 | 3.99813100  | -2.79781600 |
| C  | -0.83131300 | 5.33742000  | -1.18880400 |
| H  | 0.17881000  | 5.39397000  | -1.60376200 |
| H  | -1.36473500 | 6.25160900  | -1.47864100 |
| H  | -0.74334700 | 5.33621500  | -0.09833800 |

### 5H

Zero-point correction= 0.571817 (Hartree/Particle)

Thermal correction to Energy= 0.616043

Thermal correction to Enthalpy= 0.616987

Thermal correction to Gibbs Free Energy= 0.481325  
 Sum of electronic and zero-point Energies= -2711.789494  
 Sum of electronic and thermal Energies= -2711.745269  
 Sum of electronic and thermal Enthalpies= -2711.744325  
 Sum of electronic and thermal Free Energies= -2711.879987

|    |              |              |              |
|----|--------------|--------------|--------------|
| Fe | 0.600983000  | 0.665390000  | 0.135416000  |
| N  | 1.415888000  | -1.010908000 | 0.611319000  |
| C  | 2.763274000  | -1.141755000 | 0.337194000  |
| C  | 3.356431000  | 0.026286000  | -0.258574000 |
| C  | 3.584420000  | -2.244991000 | 0.570495000  |
| C  | 4.729966000  | 0.100306000  | -0.623613000 |
| C  | 4.938414000  | -2.190135000 | 0.221753000  |
| H  | 3.170300000  | -3.136733000 | 1.015675000  |
| C  | 2.935566000  | 2.217762000  | -0.978649000 |
| C  | 5.167548000  | 1.335237000  | -1.178293000 |
| C  | 5.514174000  | -1.071930000 | -0.362579000 |
| H  | 5.568139000  | -3.051526000 | 0.403299000  |
| C  | 4.279545000  | 2.377670000  | -1.351167000 |
| H  | 2.188907000  | 2.996086000  | -1.096189000 |
| H  | 6.202303000  | 1.448322000  | -1.462993000 |
| H  | 4.609630000  | 3.319805000  | -1.772861000 |
| N  | 2.504187000  | 1.080444000  | -0.450322000 |
| C  | 0.638348000  | -1.980467000 | 1.195223000  |
| O  | 1.010401000  | -3.094760000 | 1.553487000  |
| C  | -0.823409000 | -1.581532000 | 1.403184000  |
| H  | -1.446521000 | -2.336327000 | 0.913109000  |
| N  | -1.206290000 | -0.208786000 | -0.925968000 |
| C  | -0.536728000 | 1.076467000  | 2.920946000  |
| C  | 1.703718000  | 1.684292000  | 2.980336000  |
| C  | -0.684721000 | 1.348300000  | 4.280648000  |
| C  | 1.633576000  | 1.990887000  | 4.335598000  |
| H  | 2.628801000  | 1.793928000  | 2.423762000  |
| C  | 0.416545000  | 1.816718000  | 4.995873000  |
| H  | -1.643742000 | 1.194498000  | 4.763357000  |
| H  | 2.514015000  | 2.349551000  | 4.856259000  |
| H  | 0.327236000  | 2.036569000  | 6.054673000  |
| N  | 0.640411000  | 1.239284000  | 2.293035000  |
| C  | -1.689928000 | 0.634952000  | 2.047935000  |
| H  | -2.171570000 | 1.523120000  | 1.625566000  |
| H  | -2.447843000 | 0.108176000  | 2.638628000  |
| H  | -1.025035000 | -1.665748000 | 2.474860000  |
| C  | 0.352386000  | -0.635039000 | -2.780884000 |
| C  | -1.555610000 | -0.735692000 | -1.458139000 |
| C  | -0.262898000 | -1.350410000 | -3.803107000 |
| H  | 1.378147000  | -0.291744000 | -2.869021000 |
| C  | -2.234132000 | -1.478395000 | -2.424518000 |
| C  | -1.576556000 | -1.782899000 | -3.615976000 |
| H  | 0.282033000  | -1.570253000 | -4.714039000 |
| H  | -3.244833000 | -1.823011000 | -2.232405000 |
| H  | -2.080450000 | -2.359017000 | -4.385362000 |
| N  | -0.284242000 | -0.335920000 | -1.637805000 |
| C  | -2.208297000 | -0.282763000 | -0.172537000 |
| H  | -2.616819000 | 0.721667000  | -0.327341000 |
| H  | -3.040344000 | -0.938182000 | 0.104789000  |
| O  | 0.053410000  | 2.313422000  | -0.386632000 |
| Cl | -4.301871000 | -3.726302000 | 0.192416000  |
| O  | -5.035374000 | -4.902061000 | 0.746584000  |
| O  | -2.849687000 | -4.065697000 | 0.033396000  |
| O  | -4.435592000 | -2.561848000 | 1.129449000  |
| O  | -4.874962000 | -3.356648000 | -1.141878000 |
| N  | 6.926122000  | -1.166866000 | -0.693851000 |
| O  | 7.561941000  | -2.137111000 | -0.266421000 |
| O  | 7.443051000  | -0.289162000 | -1.397831000 |
| C  | -3.352660000 | 3.404952000  | -1.622408000 |
| C  | -2.726039000 | 4.190599000  | -0.607337000 |
| C  | -3.276747000 | 4.287279000  | 0.666813000  |
| C  | -4.465272000 | 3.614861000  | 0.985506000  |

|   |              |             |              |
|---|--------------|-------------|--------------|
| C | -5.104816000 | 2.843022000 | 0.001926000  |
| C | -4.566202000 | 2.738985000 | -1.272336000 |
| H | -1.815596000 | 4.734340000 | -0.838887000 |
| H | -2.782864000 | 4.897243000 | 1.418255000  |
| H | -4.890884000 | 3.696453000 | 1.980747000  |
| H | -6.028804000 | 2.323142000 | 0.239018000  |
| H | -5.068692000 | 2.139655000 | -2.027202000 |
| C | -2.809128000 | 3.270252000 | -2.924024000 |
| H | -0.883392000 | 2.515998000 | -0.244795000 |
| H | -3.366542000 | 2.667606000 | -3.636701000 |
| C | -1.517480000 | 3.881036000 | -3.367742000 |
| H | -1.274929000 | 3.589261000 | -4.392175000 |
| H | -1.545978000 | 4.979983000 | -3.334004000 |
| H | -0.686189000 | 3.571183000 | -2.718827000 |

**5+EB**  
**<sup>3</sup>TS**

Zero-point correction= 0.582918 (Hartree/Particle)  
 Thermal correction to Energy= 0.629322  
 Thermal correction to Enthalpy= 0.630266  
 Thermal correction to Gibbs Free Energy= 0.494243  
 Sum of electronic and zero-point Energies= -3392.842262  
 Sum of electronic and thermal Energies= -3392.795859  
 Sum of electronic and thermal Enthalpies= -3392.794914  
 Sum of electronic and thermal Free Energies= -3392.930937

|    |              |              |              |
|----|--------------|--------------|--------------|
| Fe | -0.810042000 | 0.683873000  | 0.025499000  |
| N  | -0.393299000 | -0.938453000 | 1.081605000  |
| C  | 0.914361000  | -1.342275000 | 1.089764000  |
| C  | 1.777376000  | -0.488747000 | 0.315065000  |
| C  | 1.479211000  | -2.443163000 | 1.739484000  |
| C  | 3.172871000  | -0.726945000 | 0.185121000  |
| C  | 2.851639000  | -2.692087000 | 1.620636000  |
| H  | 0.850148000  | -3.094868000 | 2.327715000  |
| C  | 1.872890000  | 1.405857000  | -1.052741000 |
| C  | 3.907031000  | 0.189924000  | -0.615210000 |
| C  | 3.690756000  | -1.871763000 | 0.875414000  |
| H  | 3.276859000  | -3.547261000 | 2.133752000  |
| C  | 3.258677000  | 1.239733000  | -1.227232000 |
| H  | 1.328056000  | 2.215654000  | -1.521829000 |
| H  | 4.974167000  | 0.065421000  | -0.740054000 |
| H  | 3.801129000  | 1.948320000  | -1.841646000 |
| N  | 1.164019000  | 0.572329000  | -0.300900000 |
| C  | -1.418132000 | -1.566191000 | 1.718242000  |
| O  | -1.371279000 | -2.597304000 | 2.390474000  |
| C  | -2.747914000 | -0.827954000 | 1.558947000  |
| H  | -3.510449000 | -1.524730000 | 1.202081000  |
| N  | -2.695148000 | 0.374623000  | 0.646878000  |
| C  | -1.912722000 | 2.081609000  | 2.208429000  |
| C  | 0.407777000  | 2.197369000  | 2.361372000  |
| C  | -2.061698000 | 2.779468000  | 3.403809000  |
| C  | 0.334032000  | 2.907023000  | 3.555803000  |
| H  | 1.361433000  | 1.941941000  | 1.917325000  |
| C  | -0.921360000 | 3.203670000  | 4.085201000  |
| H  | -3.054661000 | 2.980586000  | 3.789905000  |
| H  | 1.246077000  | 3.211570000  | 4.055618000  |
| H  | -1.012590000 | 3.749142000  | 5.018471000  |
| N  | -0.691020000 | 1.798655000  | 1.698825000  |
| C  | -3.077549000 | 1.624277000  | 1.366704000  |
| H  | -3.288954000 | 2.386844000  | 0.612799000  |
| H  | -3.979986000 | 1.476533000  | 1.967418000  |
| H  | -3.062858000 | -0.506824000 | 2.555606000  |
| C  | -0.572974000 | -1.162610000 | -2.369590000 |
| C  | -2.701742000 | -0.678588000 | -1.562479000 |
| C  | -1.091399000 | -2.006594000 | -3.346248000 |
| H  | 0.493054000  | -0.997207000 | -2.277262000 |
| C  | -3.291041000 | -1.523595000 | -2.500163000 |
| C  | -2.471850000 | -2.193695000 | -3.408206000 |

|    |              |              |              |
|----|--------------|--------------|--------------|
| H  | -0.419319000 | -2.507771000 | -4.033130000 |
| H  | -4.368520000 | -1.650059000 | -2.497199000 |
| H  | -2.905413000 | -2.856437000 | -4.149981000 |
| N  | -1.361520000 | -0.513059000 | -1.498163000 |
| C  | -3.500143000 | 0.156302000  | -0.594440000 |
| H  | -3.671097000 | 1.135848000  | -1.048395000 |
| H  | -4.465896000 | -0.300727000 | -0.365025000 |
| O  | -1.176762000 | 2.036731000  | -1.010030000 |
| Cl | -6.630896000 | -2.518848000 | -0.256714000 |
| O  | -8.068316000 | -2.601614000 | 0.138363000  |
| O  | -5.826854000 | -1.999945000 | 0.901527000  |
| O  | -6.487591000 | -1.575272000 | -1.416670000 |
| O  | -6.128091000 | -3.869933000 | -3.472620000 |
| C  | 0.583054000  | 4.854646000  | -0.926048000 |
| C  | 0.938471000  | 5.008027000  | -2.282827000 |
| C  | 2.253374000  | 5.289051000  | -2.652067000 |
| C  | 3.248335000  | 5.424103000  | -1.678117000 |
| C  | 2.914622000  | 5.275748000  | -0.328075000 |
| C  | 1.601278000  | 4.991715000  | 0.040916000  |
| H  | 0.181068000  | 4.907322000  | -3.053826000 |
| H  | 2.502945000  | 5.405604000  | -3.702829000 |
| H  | 4.271023000  | 5.645845000  | -1.968181000 |
| H  | 3.677966000  | 5.385686000  | 0.436869000  |
| H  | 1.348732000  | 4.883642000  | 1.092352000  |
| C  | -0.794378000 | 4.509684000  | -0.506592000 |
| H  | -0.913886000 | 3.232311000  | -0.663597000 |
| H  | -0.933041000 | 4.630523000  | 0.571517000  |
| C  | -1.967340000 | 5.056731000  | -1.305095000 |
| H  | -2.914345000 | 4.698162000  | -0.891832000 |
| H  | -1.983452000 | 6.153893000  | -1.274924000 |
| H  | -1.930190000 | 4.755172000  | -2.356049000 |
| S  | 5.399544000  | -2.338213000 | 0.821134000  |
| O  | 6.272807000  | -1.156802000 | 0.737272000  |
| O  | 5.654909000  | -3.380031000 | 1.825233000  |
| C  | 5.577594000  | -3.205906000 | -0.835707000 |
| F  | 6.843523000  | -3.597113000 | -0.974146000 |
| F  | 5.258510000  | -2.365873000 | -1.825344000 |
| F  | 4.771875000  | -4.266710000 | -0.876739000 |

**<sup>3</sup>H**

Zero-point correction= 0.585997 (Hartree/Particle)  
 Thermal correction to Energy= 0.633823  
 Thermal correction to Enthalpy= 0.634767  
 Thermal correction to Gibbs Free Energy= 0.493086  
 Sum of electronic and zero-point Energies= -3392.869831  
 Sum of electronic and thermal Energies= -3392.822005  
 Sum of electronic and thermal Enthalpies= -3392.821061  
 Sum of electronic and thermal Free Energies= -3392.962742

|    |              |              |              |
|----|--------------|--------------|--------------|
| Fe | -0.843294000 | 0.585229000  | -0.008227000 |
| N  | -0.361668000 | -0.994384000 | 1.019191000  |
| C  | 0.970644000  | -1.316996000 | 1.048533000  |
| C  | 1.789594000  | -0.436022000 | 0.256068000  |
| C  | 1.589497000  | -2.368740000 | 1.727056000  |
| C  | 3.195683000  | -0.606044000 | 0.133479000  |
| C  | 2.974127000  | -2.548763000 | 1.617099000  |
| H  | 0.993195000  | -3.038046000 | -3.295430000 |
| C  | 1.792665000  | 1.432197000  | -1.149590000 |
| C  | 3.883650000  | 0.327432000  | -0.688549000 |
| C  | 3.770364000  | -1.705396000 | 0.852189000  |
| H  | 3.441660000  | -3.367171000 | 2.152791000  |
| C  | 3.184709000  | 1.330312000  | -1.323150000 |
| H  | 1.213047000  | 2.207589000  | -1.637160000 |
| H  | 4.955653000  | 0.253360000  | -0.811469000 |
| H  | 3.691866000  | 2.051180000  | -1.952961000 |
| N  | 1.124289000  | 0.580714000  | -0.381966000 |
| C  | -1.357400000 | -1.654470000 | 1.675056000  |
| O  | -1.251984000 | -2.654406000 | 2.384950000  |



|    |              |              |              |
|----|--------------|--------------|--------------|
| C  | -2.731585000 | -1.016210000 | 1.460019000  |
| H  | -3.383232000 | -1.758941000 | 0.989797000  |
| N  | -2.714852000 | 0.241670000  | 0.626580000  |
| C  | -1.909208000 | 1.919757000  | 2.227642000  |
| C  | 0.407943000  | 2.156299000  | 2.288398000  |
| C  | -2.042849000 | 2.595178000  | 3.437798000  |
| C  | 0.346793000  | 2.851480000  | 3.491131000  |
| H  | 1.354752000  | 1.957613000  | 1.803029000  |
| C  | -0.899137000 | 3.071382000  | 4.077285000  |
| H  | -3.028121000 | 2.742532000  | 3.865665000  |
| H  | 1.261190000  | 3.203197000  | 3.954242000  |
| H  | -0.980083000 | 3.601032000  | 5.020619000  |
| N  | -0.695048000 | 1.701653000  | 1.668727000  |
| C  | -3.091390000 | 1.447083000  | 1.418866000  |
| H  | -3.351831000 | 2.235605000  | 0.708159000  |
| H  | -3.962159000 | 1.251454000  | 2.051840000  |
| H  | -3.159595000 | -0.798654000 | 2.442073000  |
| C  | -0.628853000 | -1.213124000 | -2.418879000 |
| C  | -2.757887000 | -0.722184000 | -1.609743000 |
| C  | -1.152830000 | -2.017689000 | -3.424826000 |
| H  | 0.438775000  | -1.067161000 | -2.312115000 |
| C  | -3.351508000 | -1.532098000 | -2.574680000 |
| C  | -2.535597000 | -2.182782000 | -3.499614000 |
| H  | -0.484224000 | -2.507929000 | -4.122810000 |
| H  | -4.428162000 | -1.662561000 | -2.580811000 |
| H  | -2.973894000 | -2.817711000 | -4.262601000 |
| N  | -1.415618000 | -0.578261000 | -1.534687000 |
| C  | -3.539319000 | 0.089016000  | -0.609351000 |
| H  | -3.691705000 | 1.088218000  | -1.023972000 |
| H  | -4.512332000 | -0.355842000 | -0.381887000 |
| O  | -1.323315000 | 2.035229000  | -1.000028000 |
| Cl | -6.195938000 | -2.914396000 | -0.165496000 |
| O  | -6.343350000 | -1.575102000 | 0.494744000  |
| O  | -4.797411000 | -3.414821000 | 0.045407000  |
| O  | -6.457003000 | -2.774590000 | -1.634181000 |
| O  | -7.169143000 | -3.876388000 | 0.429942000  |
| C  | 0.120530000  | 5.338531000  | -0.743620000 |
| C  | 0.245247000  | 5.176584000  | -2.156941000 |
| C  | 1.493783000  | 5.065715000  | -2.757327000 |
| C  | 2.665278000  | 5.110794000  | -1.987127000 |
| C  | 2.569313000  | 5.263444000  | -0.594451000 |
| C  | 1.329323000  | 5.373055000  | 0.016743000  |
| H  | -0.648756000 | 5.144045000  | -2.771445000 |
| H  | 1.560740000  | 4.948558000  | -3.835455000 |
| H  | 3.637522000  | 5.032727000  | -2.464062000 |
| H  | 3.471882000  | 5.299135000  | 0.009239000  |
| H  | 1.263413000  | 5.493303000  | 1.095014000  |
| C  | -1.134601000 | 5.464846000  | -0.096031000 |
| H  | -0.839930000 | 2.822148000  | -0.707665000 |
| H  | -1.125434000 | 5.570413000  | 0.986040000  |
| C  | -2.461217000 | 5.451438000  | -0.789490000 |
| H  | -2.696617000 | 4.455091000  | -1.192117000 |
| H  | -3.264924000 | 5.725974000  | -0.102039000 |
| H  | -2.492237000 | 6.146665000  | -1.638605000 |
| S  | 5.503040000  | -2.082323000 | 0.814428000  |
| O  | 6.311722000  | -0.858316000 | 0.701701000  |
| O  | 5.808524000  | -3.082003000 | 1.846756000  |
| C  | 5.731922000  | -2.982765000 | -0.818698000 |
| F  | 7.019408000  | -3.298492000 | -0.949467000 |
| F  | 5.360420000  | -2.191306000 | -1.829724000 |
| F  | 4.993211000  | -4.091757000 | -0.828075000 |

### <sup>5</sup>TS

Zero-point correction= 0.579813 (Hartree/Particle)  
 Thermal correction to Energy= 0.627722  
 Thermal correction to Enthalpy= 0.628666  
 Thermal correction to Gibbs Free Energy= 0.484325

Sum of electronic and zero-point Energies= -3392.835947  
 Sum of electronic and thermal Energies= -3392.788038  
 Sum of electronic and thermal Enthalpies= -3392.787094  
 Sum of electronic and thermal Free Energies= -3392.931435

|    |              |              |              |
|----|--------------|--------------|--------------|
| Fe | 0.406947000  | -0.838349000 | -0.075217000 |
| N  | -0.622513000 | 0.651518000  | 0.954774000  |
| C  | -1.993277000 | 0.620139000  | 0.908498000  |
| C  | -2.538309000 | -0.468403000 | 0.128053000  |
| C  | -2.896795000 | 1.497864000  | 1.516722000  |
| C  | -3.938464000 | -0.666926000 | -0.035495000 |
| C  | -4.276755000 | 1.317239000  | 1.360284000  |
| H  | -2.518658000 | 2.317008000  | 2.109314000  |
| C  | -2.034205000 | -2.339401000 | -1.186761000 |
| C  | -4.341689000 | -1.776404000 | -0.825881000 |
| C  | -4.804565000 | 0.272115000  | 0.614826000  |
| H  | -4.954711000 | 2.009751000  | 1.846326000  |
| C  | -3.397112000 | -2.602631000 | -1.396769000 |
| H  | -1.252671000 | -2.960219000 | -1.610817000 |
| H  | -5.394021000 | -1.978038000 | -0.974418000 |
| H  | -3.692503000 | -3.451674000 | -2.001801000 |
| N  | -1.629653000 | -1.309806000 | -0.450709000 |
| C  | 0.092437000  | 1.588597000  | 1.641564000  |
| O  | -0.345234000 | 2.529911000  | 2.307664000  |
| C  | 1.617109000  | 1.431767000  | 1.558882000  |
| H  | 2.019500000  | 2.367138000  | 1.157627000  |
| N  | 2.135005000  | 0.275043000  | 0.762911000  |
| C  | 1.929685000  | -1.509224000 | 2.449635000  |
| C  | -0.144030000 | -2.558551000 | 2.540555000  |
| C  | 2.267422000  | -1.992675000 | 3.713047000  |
| C  | 0.126352000  | -3.087794000 | 3.798305000  |
| H  | -1.087422000 | -2.746733000 | 2.038895000  |
| C  | 1.354140000  | -2.796721000 | 4.393834000  |
| H  | 3.227548000  | -1.740587000 | 4.149710000  |
| H  | -0.612767000 | -3.705130000 | 4.295626000  |
| H  | 1.595242000  | -3.184754000 | 5.378028000  |
| N  | 0.740418000  | -1.790070000 | 1.885537000  |
| C  | 2.880106000  | -0.693238000 | 1.604066000  |
| H  | 3.417047000  | -1.375702000 | 0.936690000  |
| H  | 3.624544000  | -0.187790000 | 2.229827000  |
| H  | 1.983025000  | 1.360481000  | 2.587385000  |
| C  | -0.005626000 | 1.049329000  | -2.586747000 |
| C  | 2.031168000  | 1.274809000  | -1.483819000 |
| C  | 0.314378000  | 2.065964000  | -3.480617000 |
| H  | -0.954655000 | 0.526195000  | -2.640620000 |
| C  | 2.413644000  | 2.318027000  | -2.326624000 |
| C  | 1.543003000  | 2.712820000  | -3.342017000 |
| H  | -0.389932000 | 2.346129000  | -4.255468000 |
| H  | 3.365140000  | 2.815799000  | -2.171001000 |
| H  | 1.816997000  | 3.521939000  | -4.011363000 |
| N  | 0.836715000  | 0.666411000  | -1.614166000 |
| C  | 2.935245000  | 0.719494000  | -0.408633000 |
| H  | 3.447092000  | -0.160089000 | -0.814067000 |
| H  | 3.696377000  | 1.448181000  | -0.111198000 |
| O  | 1.116135000  | -2.125440000 | -0.956676000 |
| Cl | 4.524364000  | 4.354560000  | 0.449782000  |
| O  | 5.206090000  | 5.514968000  | 1.095786000  |
| O  | 3.038235000  | 4.537026000  | 0.521645000  |
| O  | 4.902299000  | 3.089030000  | 1.161623000  |
| O  | 4.945345000  | 4.258581000  | -0.985893000 |
| C  | 4.054139000  | -3.416731000 | -1.602240000 |
| C  | 4.678398000  | -3.844893000 | -0.411954000 |
| C  | 5.940467000  | -3.371027000 | -0.056458000 |
| C  | 6.606834000  | -2.452596000 | -0.874389000 |
| C  | 6.000624000  | -2.012036000 | -2.056093000 |
| C  | 4.740581000  | -2.486132000 | -2.412643000 |
| H  | 4.177834000  | -4.558611000 | 0.234236000  |
| H  | 6.407191000  | -3.720015000 | 0.860052000  |

|   |              |              |              |
|---|--------------|--------------|--------------|
| H | 7.589496000  | -2.085031000 | -0.594605000 |
| H | 6.513400000  | -1.303426000 | -2.699815000 |
| H | 4.275915000  | -2.145051000 | -3.334312000 |
| C | 2.696383000  | -3.860506000 | -1.992557000 |
| H | 1.936555000  | -3.012123000 | -1.504363000 |
| H | 2.516554000  | -3.712273000 | -3.062468000 |
| C | 2.170318000  | -5.198179000 | -1.497350000 |
| H | 1.146695000  | -5.356894000 | -1.847664000 |
| H | 2.786067000  | -6.024346000 | -1.874945000 |
| H | 2.161892000  | -5.263017000 | -0.405292000 |
| S | -6.573010000 | 0.187687000  | 0.521077000  |
| O | -7.037901000 | 1.1207027000 | 0.455098000  |
| O | -7.159465000 | 1.119480000  | 1.494012000  |
| C | -6.974382000 | 0.924532000  | -1.160045000 |
| F | -8.295278000 | 0.891969000  | -1.330505000 |
| F | -6.382024000 | 0.210874000  | -2.122766000 |
| F | -6.544988000 | 2.184908000  | -1.213278000 |

**<sup>5</sup>H**

Zero-point correction= 0.583532 (Hartree/Particle)  
 Thermal correction to Energy= 0.631697  
 Thermal correction to Enthalpy= 0.632641  
 Thermal correction to Gibbs Free Energy= 0.488204  
 Sum of electronic and zero-point Energies= -3392.858224  
 Sum of electronic and thermal Energies= -3392.810059  
 Sum of electronic and thermal Enthalpies= -3392.809115  
 Sum of electronic and thermal Free Energies= -3392.953552

|    |              |              |              |
|----|--------------|--------------|--------------|
| Fe | -0.305272000 | -0.625708000 | 0.280285000  |
| N  | 0.632437000  | 0.517683000  | -0.954306000 |
| C  | 2.012427000  | 0.429029000  | -0.952698000 |
| C  | 2.531986000  | -0.531651000 | -0.016364000 |
| C  | 2.920818000  | 1.142230000  | -1.733499000 |
| C  | 3.922102000  | -0.777327000 | 0.142461000  |
| C  | 4.298702000  | 0.917151000  | -1.586271000 |
| H  | 2.559634000  | 1.865819000  | -2.448425000 |
| C  | 1.964210000  | -2.115789000 | 1.613354000  |
| C  | 4.289691000  | -1.758046000 | 1.103622000  |
| C  | 4.803594000  | -0.008825000 | -0.685972000 |
| H  | 4.989261000  | 1.479038000  | -2.204889000 |
| C  | 3.319819000  | -2.416350000 | 1.830833000  |
| H  | 1.156444000  | -2.598846000 | 2.152936000  |
| H  | 5.333754000  | -1.993594000 | 1.261032000  |
| H  | 3.590599000  | -3.164723000 | 2.566120000  |
| N  | 1.597024000  | -1.207206000 | 0.720134000  |
| C  | -0.094907000 | 1.340672000  | -1.776459000 |
| O  | 0.355877000  | 2.116100000  | -2.616119000 |
| C  | -1.609718000 | 1.246300000  | -1.589476000 |
| H  | -1.974968000 | 2.248719000  | -1.345232000 |
| N  | -2.086175000 | 0.261641000  | -0.559024000 |
| C  | -2.033610000 | -1.788437000 | -1.930627000 |
| C  | 0.023277000  | -2.863177000 | -2.008577000 |
| C  | -2.490026000 | -2.502490000 | -3.038365000 |
| C  | -0.362786000 | -3.625289000 | -3.106659000 |
| H  | 1.011259000  | -2.963668000 | -1.570845000 |
| C  | -1.642491000 | -3.437823000 | -3.630763000 |
| H  | -3.488104000 | -2.325420000 | -3.424092000 |
| H  | 0.327668000  | -4.339789000 | -3.539841000 |
| H  | -1.973998000 | -4.007387000 | -4.492668000 |
| N  | -0.796729000 | -1.967910000 | -1.436463000 |
| C  | -2.906323000 | -0.811447000 | -1.175580000 |
| H  | -3.423343000 | -1.351895000 | -0.375748000 |
| H  | -3.678442000 | -0.391001000 | -1.829608000 |
| H  | -2.037626000 | 0.994751000  | -2.564107000 |
| C  | 0.245538000  | 1.691507000  | 2.415741000  |
| C  | -1.860767000 | 1.696182000  | 1.433726000  |
| C  | -0.038715000 | 2.845421000  | 3.138936000  |
| H  | 1.208186000  | 1.196693000  | 2.495213000  |

|    |              |              |              |
|----|--------------|--------------|--------------|
| C  | -2.214059000 | 2.867085000  | 2.104502000  |
| C  | -1.288729000 | 3.443829000  | 2.973785000  |
| H  | 0.707483000  | 3.265631000  | 3.803491000  |
| H  | -3.183956000 | 3.320423000  | 1.928643000  |
| H  | -1.537195000 | 4.354527000  | 3.509151000  |
| N  | -0.648746000 | 1.133726000  | 1.584907000  |
| C  | -2.821528000 | 0.949052000  | 0.537519000  |
| H  | -3.331333000 | 0.185375000  | 1.135247000  |
| H  | -3.588044000 | 1.616406000  | 0.130561000  |
| O  | -0.962414000 | -1.779866000 | 1.509031000  |
| Cl | -4.376521000 | 4.385463000  | -0.924013000 |
| O  | -5.015759000 | 5.412805000  | -1.797951000 |
| O  | -2.885138000 | 4.463780000  | -1.060424000 |
| O  | -4.838101000 | 3.017880000  | -1.334609000 |
| O  | -4.758982000 | 4.628162000  | 0.504348000  |
| C  | -4.557753000 | -3.725025000 | 1.207184000  |
| C  | -5.637129000 | -2.876477000 | 0.817708000  |
| C  | -5.963908000 | -1.745726000 | 1.556995000  |
| C  | -5.238266000 | -1.407346000 | 2.708489000  |
| C  | -4.172830000 | -2.227720000 | 3.116342000  |
| C  | -3.837231000 | -3.360393000 | 2.385906000  |
| H  | -6.216606000 | -3.122246000 | -0.066385000 |
| H  | -6.792728000 | -1.119417000 | 1.238807000  |
| H  | -5.502260000 | -0.525624000 | 3.284163000  |
| H  | -3.611953000 | -1.980571000 | 4.013429000  |
| H  | -3.018143000 | -3.995044000 | 2.714338000  |
| C  | -4.194340000 | -4.885175000 | 0.479851000  |
| H  | -1.925239000 | -1.795749000 | 1.615288000  |
| H  | -3.372913000 | -5.479673000 | 0.872481000  |
| C  | -4.879527000 | -5.367960000 | -0.759394000 |
| H  | -4.310083000 | -6.169161000 | -1.236338000 |
| H  | -5.883740000 | -5.763943000 | -0.544563000 |
| H  | -5.014834000 | -4.566051000 | -1.496416000 |
| S  | 6.572028000  | -0.168556000 | -0.626409000 |
| O  | 6.967145000  | -1.554260000 | -0.330505000 |
| O  | 7.164717000  | 0.548288000  | -1.762955000 |
| C  | 7.058369000  | 0.827215000  | 0.891427000  |
| F  | 8.381148000  | 0.762515000  | 1.030203000  |
| F  | 6.468350000  | 0.316265000  | 1.976284000  |
| F  | 6.682493000  | 2.095776000  | 0.735992000  |

**6+EB**

**<sup>3</sup>TS**

Zero-point correction= 0.592828 (Hartree/Particle)  
 Thermal correction to Energy= 0.637228  
 Thermal correction to Enthalpy= 0.638172  
 Thermal correction to Gibbs Free Energy= 0.504940  
 Sum of electronic and zero-point Energies= -3193.352047  
 Sum of electronic and thermal Energies= -3193.307648  
 Sum of electronic and thermal Enthalpies= -3193.306703  
 Sum of electronic and thermal Free Energies= -3193.439935

|    |              |              |              |
|----|--------------|--------------|--------------|
| Fe | -0.675363000 | -1.119612000 | 0.293818000  |
| N  | 0.988904000  | 0.053001000  | 0.071191000  |
| N  | -1.071280000 | 0.219005000  | 1.732812000  |
| N  | -1.426888000 | 0.217920000  | -0.990620000 |
| N  | 0.489165000  | -2.145887000 | 1.540053000  |
| N  | 0.141350000  | -2.169697000 | -1.190842000 |
| O  | -2.027821000 | -2.187686000 | 0.451635000  |
| C  | -1.773060000 | 0.057250000  | 2.863837000  |
| C  | -1.905254000 | 1.090258000  | 3.788689000  |
| C  | -1.281862000 | 2.310860000  | 3.531927000  |
| C  | -0.531192000 | 2.471036000  | 2.363717000  |
| C  | -0.447527000 | 1.394632000  | 1.489465000  |
| C  | 0.297455000  | 1.395958000  | 0.165139000  |
| C  | -0.763296000 | 1.394993000  | -0.921622000 |
| C  | -1.069619000 | 2.465618000  | -1.750916000 |
| C  | -2.094366000 | 2.296667000  | -2.687311000 |

|    |              |              |              |
|----|--------------|--------------|--------------|
| C  | -2.765344000 | 1.077276000  | -2.763092000 |
| C  | -2.402165000 | 0.050191000  | -1.894544000 |
| C  | 0.167380000  | -3.335197000 | 2.080724000  |
| C  | 1.058387000  | -4.034273000 | 2.884749000  |
| C  | 2.322451000  | -3.489585000 | 3.118186000  |
| C  | 2.650537000  | -2.260030000 | 2.551779000  |
| C  | 1.702214000  | -1.600878000 | 1.771467000  |
| C  | 1.947095000  | -0.228386000 | 1.190133000  |
| C  | 1.602218000  | -0.230389000 | -1.266424000 |
| C  | 1.266100000  | -1.633243000 | -1.712759000 |
| C  | 2.028798000  | -2.324954000 | -2.651497000 |
| C  | 1.593812000  | -3.578320000 | -3.079427000 |
| C  | 0.415372000  | -4.110097000 | -2.553916000 |
| C  | -0.280958000 | -3.379022000 | -1.598851000 |
| H  | -2.225454000 | -0.915070000 | 3.014995000  |
| H  | -2.486059000 | 0.931175000  | 4.689611000  |
| H  | -1.369037000 | 3.130146000  | 4.237792000  |
| H  | -0.024523000 | 3.403275000  | 2.132416000  |
| H  | 0.986017000  | 2.241466000  | 0.075803000  |
| H  | -0.521015000 | 3.398676000  | -1.663846000 |
| H  | -2.359459000 | 3.110903000  | -3.353542000 |
| H  | -3.565914000 | 0.915594000  | -3.474648000 |
| H  | -2.892456000 | -0.915067000 | -1.901826000 |
| H  | -0.824520000 | -3.700872000 | 1.842912000  |
| H  | 0.766294000  | -4.988807000 | 3.306697000  |
| H  | 3.046119000  | -4.018865000 | 3.729194000  |
| H  | 3.628850000  | -1.816379000 | 2.692075000  |
| H  | 2.953995000  | -1.891100000 | -3.014078000 |
| H  | 2.171543000  | -4.135614000 | -3.809465000 |
| H  | 0.045190000  | -5.080754000 | -2.862741000 |
| H  | -1.189151000 | -3.737824000 | -1.128684000 |
| H  | 2.978395000  | -0.129315000 | 0.842678000  |
| H  | 1.800501000  | 0.516754000  | 1.977252000  |
| H  | 2.681331000  | -0.062049000 | -1.237124000 |
| H  | 1.191224000  | 0.471316000  | -1.997610000 |
| Cl | 5.547584000  | -0.983642000 | -0.744724000 |
| O  | 5.342727000  | -1.450920000 | -2.152435000 |
| O  | 4.869618000  | 0.348190000  | -0.565239000 |
| O  | 7.006327000  | -0.837144000 | -0.467394000 |
| O  | 4.944360000  | -1.971124000 | 0.205866000  |
| Cl | 1.474520000  | 5.386403000  | 0.018208000  |
| O  | 2.231762000  | 4.092155000  | -0.053431000 |
| O  | 2.426847000  | 6.528549000  | -0.094505000 |
| O  | 0.749209000  | 5.462156000  | 1.328003000  |
| O  | 0.484902000  | 5.441882000  | -1.106390000 |
| C  | -6.362689000 | -0.600799000 | -2.049078000 |
| C  | -6.504046000 | 0.768741000  | -1.801444000 |
| C  | -5.982996000 | 1.314546000  | -0.623516000 |
| C  | -5.326686000 | 0.497983000  | 0.294152000  |
| C  | -5.178737000 | -0.886713000 | 0.064735000  |
| C  | -5.708094000 | -1.419095000 | -1.129660000 |
| H  | -6.768073000 | -1.032523000 | -2.959637000 |
| H  | -7.017829000 | 1.403093000  | -2.517531000 |
| H  | -6.093494000 | 2.375632000  | -0.419648000 |
| H  | -4.929485000 | 0.926759000  | 1.210747000  |
| H  | -5.612218000 | -2.480104000 | -1.337259000 |
| C  | -4.464110000 | -1.720933000 | 1.055677000  |
| H  | -3.231039000 | -1.796936000 | 0.707353000  |
| H  | -4.383421000 | -1.211980000 | 2.020533000  |
| C  | -4.845037000 | -3.184875000 | 1.208916000  |
| H  | -4.730723000 | -3.742617000 | 0.274765000  |
| H  | -4.213417000 | -3.665271000 | 1.960968000  |
| H  | -5.889373000 | -3.284844000 | 1.530919000  |

### <sup>3</sup>H

Zero-point correction= 0.595846 (Hartree/Particle)  
 Thermal correction to Energy= 0.641729

|                                                           |              |              |              |
|-----------------------------------------------------------|--------------|--------------|--------------|
| Thermal correction to Enthalpy= 0.642674                  |              |              |              |
| Thermal correction to Gibbs Free Energy= 0.502413         |              |              |              |
| Sum of electronic and zero-point Energies= -3193.379144   |              |              |              |
| Sum of electronic and thermal Energies= -3193.333260      |              |              |              |
| Sum of electronic and thermal Enthalpies= -3193.332316    |              |              |              |
| Sum of electronic and thermal Free Energies= -3193.472577 |              |              |              |
| Fe                                                        | -0.863590000 | -0.762306000 | 0.297980000  |
| N                                                         | 1.025801000  | -0.073104000 | 0.063832000  |
| N                                                         | -0.922343000 | 0.654609000  | 1.705956000  |
| N                                                         | -1.273823000 | 0.714304000  | -0.986445000 |
| N                                                         | -0.025263000 | -2.053161000 | 1.550471000  |
| N                                                         | -0.369269000 | -2.014382000 | -1.161409000 |
| O                                                         | -2.522287000 | -1.422207000 | 0.501216000  |
| C                                                         | -1.679208000 | 0.708279000  | 2.811074000  |
| C                                                         | -1.551467000 | 1.755105000  | 3.720974000  |
| C                                                         | -0.611347000 | 2.754986000  | 3.473560000  |
| C                                                         | 0.182713000  | 2.691616000  | 2.324172000  |
| C                                                         | -0.004779000 | 1.618637000  | 1.462783000  |
| C                                                         | 0.715315000  | 1.407247000  | 0.140619000  |
| C                                                         | -0.320388000 | 1.674135000  | -0.939931000 |
| C                                                         | -0.352491000 | 2.786533000  | -1.769919000 |
| C                                                         | -1.411527000 | 2.897009000  | -2.676622000 |
| C                                                         | -2.388156000 | 1.903396000  | -2.722129000 |
| C                                                         | -2.286857000 | 0.814667000  | -1.858633000 |
| C                                                         | -0.650171000 | -3.110931000 | 2.096462000  |
| C                                                         | 0.028253000  | -4.018490000 | 2.900482000  |
| C                                                         | 1.392734000  | -3.827693000 | 3.125887000  |
| C                                                         | 2.033855000  | -2.730641000 | 2.553831000  |
| C                                                         | 1.289429000  | -1.846632000 | 1.775357000  |
| C                                                         | 1.880302000  | -0.586691000 | 1.187588000  |
| C                                                         | 1.541645000  | -0.524536000 | -1.272020000 |
| C                                                         | 0.852476000  | -1.799499000 | -1.695728000 |
| C                                                         | 1.398868000  | -2.682167000 | -2.624407000 |
| C                                                         | 0.644918000  | -3.783988000 | -3.026953000 |
| C                                                         | -0.627622000 | -3.978996000 | -2.487814000 |
| C                                                         | -1.100353000 | -3.075036000 | -1.543564000 |
| H                                                         | -2.390349000 | -0.098249000 | 2.947029000  |
| H                                                         | -2.181126000 | 1.778153000  | 4.602544000  |
| H                                                         | -0.492368000 | 3.578443000  | 4.169797000  |
| H                                                         | 0.922139000  | 3.453550000  | 2.096597000  |
| H                                                         | 1.602716000  | 2.039079000  | 0.040075000  |
| H                                                         | 0.425804000  | 3.540881000  | -1.702840000 |
| H                                                         | -1.468496000 | 3.752399000  | -3.341606000 |
| H                                                         | -3.224561000 | 1.962537000  | -3.408094000 |
| H                                                         | -3.018719000 | 0.014956000  | -1.847844000 |
| H                                                         | -1.704984000 | -3.198289000 | 1.864355000  |
| H                                                         | -0.503480000 | -4.860284000 | 3.328392000  |
| H                                                         | 1.952839000  | -4.528602000 | 3.735971000  |
| H                                                         | 3.095641000  | -2.562203000 | 2.688090000  |
| H                                                         | 2.401711000  | -2.512281000 | -2.999269000 |
| H                                                         | 1.049342000  | -4.485600000 | -3.749061000 |
| H                                                         | -1.241757000 | -4.823423000 | -2.778155000 |
| H                                                         | -2.067499000 | -3.170260000 | -1.063859000 |
| H                                                         | 2.902247000  | -0.755964000 | 0.840033000  |
| H                                                         | 1.928710000  | 0.176842000  | 1.969183000  |
| H                                                         | 2.627837000  | -0.638694000 | -1.242718000 |
| H                                                         | 1.321593000  | 0.250286000  | -2.011752000 |
| Cl                                                        | 5.208028000  | -2.197954000 | -0.681791000 |
| O                                                         | 4.793575000  | -2.692943000 | -2.032543000 |
| O                                                         | 4.837614000  | -0.744256000 | -0.555297000 |
| O                                                         | 6.683636000  | -2.347072000 | -0.518690000 |
| O                                                         | 4.496332000  | -2.978121000 | 0.379863000  |
| Cl                                                        | 2.906908000  | 4.924498000  | -0.040318000 |
| O                                                         | 3.297877000  | 3.475441000  | -0.073842000 |
| O                                                         | 4.125996000  | 5.772964000  | -0.172064000 |
| O                                                         | 2.223332000  | 5.221174000  | 1.260473000  |
| O                                                         | 1.969646000  | 5.209629000  | -1.174939000 |

|   |              |              |              |
|---|--------------|--------------|--------------|
| C | -5.987025000 | -0.553558000 | -2.191400000 |
| C | -6.098126000 | 0.817150000  | -2.468904000 |
| C | -6.083454000 | 1.738535000  | -1.409469000 |
| C | -5.963568000 | 1.300674000  | -0.098991000 |
| C | -5.856128000 | -0.088797000 | 0.212863000  |
| C | -5.868375000 | -1.004784000 | -0.882419000 |
| H | -6.000185000 | -1.272053000 | -3.006438000 |
| H | -6.199074000 | 1.161800000  | -3.493531000 |
| H | -6.169777000 | 2.801656000  | -1.615921000 |
| H | -5.957837000 | 2.020016000  | 0.716045000  |
| H | -5.789409000 | -2.069587000 | -0.687950000 |
| C | -5.751516000 | -0.513251000 | 1.561908000  |
| H | -3.194506000 | -0.728132000 | 0.587137000  |
| H | -5.749797000 | 0.259942000  | 2.326381000  |
| C | -5.661880000 | -1.941282000 | 2.003008000  |
| H | -4.732021000 | -2.414164000 | 1.656117000  |
| H | -5.685399000 | -2.016859000 | 3.092647000  |
| H | -6.487724000 | -2.547899000 | 1.606777000  |

**<sup>5</sup>TS**

Zero-point correction= 0.590693 (Hartree/Particle)  
 Thermal correction to Energy= 0.636642  
 Thermal correction to Enthalpy= 0.637586  
 Thermal correction to Gibbs Free Energy= 0.496633  
 Sum of electronic and zero-point Energies= -3193.346198  
 Sum of electronic and thermal Energies= -3193.300250  
 Sum of electronic and thermal Enthalpies= -3193.299305  
 Sum of electronic and thermal Free Energies= -3193.440259

|    |              |              |              |
|----|--------------|--------------|--------------|
| Fe | 1.152158000  | 0.122961000  | 0.709462000  |
| O  | 2.768393000  | 0.309279000  | 1.175243000  |
| N  | -0.968758000 | -0.141677000 | 0.125344000  |
| C  | -1.036913000 | -0.828858000 | -1.196863000 |
| C  | -1.676190000 | -0.915455000 | 1.186942000  |
| C  | -1.369906000 | 1.306000000  | 0.069560000  |
| N  | 0.104873000  | 1.560418000  | 1.959632000  |
| N  | 0.849243000  | 1.663061000  | -0.803845000 |
| N  | 1.326401000  | -1.342056000 | -0.844177000 |
| N  | 0.558282000  | -1.451319000 | 2.020277000  |
| C  | 0.176610000  | -1.695017000 | -1.454380000 |
| C  | -0.737782000 | -1.818952000 | 1.956322000  |
| C  | -1.200821000 | -2.951968000 | 2.625355000  |
| C  | -0.306105000 | -3.692422000 | 3.395488000  |
| C  | 1.029528000  | -3.291394000 | 3.472098000  |
| C  | 1.426665000  | -2.168085000 | 2.758606000  |
| C  | 0.127816000  | -2.773727000 | -2.337406000 |
| C  | 1.302012000  | -3.472034000 | -2.612736000 |
| C  | 2.492793000  | -3.082788000 | -1.995738000 |
| C  | 2.461352000  | -2.016488000 | -1.106178000 |
| C  | 1.770600000  | 2.244719000  | -1.584938000 |
| C  | 1.422488000  | 3.209200000  | -2.527851000 |
| C  | 0.081186000  | 3.568760000  | -2.655106000 |
| C  | -0.878990000 | 2.959761000  | -1.841823000 |
| C  | -0.450611000 | 2.006265000  | -0.924560000 |
| C  | -1.084885000 | 1.921681000  | 1.434023000  |
| C  | -1.928449000 | 2.824534000  | 2.072310000  |
| C  | -1.513959000 | 3.362373000  | 3.294283000  |
| C  | -0.284120000 | 2.985597000  | 3.833140000  |
| H  | 1.467969000  | 1.744809000  | 3.500869000  |
| H  | 0.065559000  | 3.385358000  | 4.777884000  |
| H  | -2.149342000 | 4.068053000  | 3.819398000  |
| H  | -2.879275000 | 3.098205000  | 1.624357000  |
| H  | -2.420414000 | 1.437740000  | -0.209865000 |
| H  | -2.121114000 | -0.212916000 | 1.897757000  |
| H  | -2.498485000 | -1.501719000 | 0.766886000  |
| H  | -1.949049000 | -1.425659000 | -1.286219000 |
| H  | -1.078618000 | -0.071154000 | -1.984972000 |
| H  | -2.239029000 | -3.245854000 | 2.520595000  |

|    |              |              |              |
|----|--------------|--------------|--------------|
| H  | -0.820494000 | -3.059080000 | -2.778568000 |
| H  | -0.645194000 | -4.577035000 | 3.924668000  |
| H  | 1.287358000  | -4.314287000 | -3.296887000 |
| H  | 1.753913000  | -3.842802000 | 4.060113000  |
| H  | 2.452313000  | -1.816532000 | 2.754949000  |
| H  | 3.347419000  | -1.678336000 | -0.580162000 |
| H  | 3.425706000  | -3.600158000 | -2.186986000 |
| H  | 2.797967000  | 1.925673000  | -1.441862000 |
| H  | 2.189874000  | 3.663177000  | -3.143982000 |
| H  | -0.219705000 | 4.315744000  | -3.382384000 |
| Cl | -4.980175000 | 3.260961000  | -0.873778000 |
| O  | -4.136404000 | 4.049493000  | -1.829471000 |
| O  | -4.538403000 | 1.826805000  | -0.891723000 |
| O  | -4.815849000 | 3.811308000  | 0.511046000  |
| O  | -6.412722000 | 3.347013000  | -1.280215000 |
| Cl | -3.521946000 | -4.222843000 | -0.752762000 |
| O  | -2.290565000 | -5.026016000 | -0.488597000 |
| O  | -3.865201000 | -3.410975000 | 0.464554000  |
| O  | -4.660656000 | -5.130130000 | -1.080869000 |
| O  | -3.278144000 | -3.290948000 | -1.906385000 |
| H  | -1.930894000 | 3.219764000  | -1.913887000 |
| C  | 0.502706000  | 2.074783000  | 3.132312000  |
| C  | 6.314605000  | -0.634480000 | -0.443785000 |
| C  | 6.787040000  | -0.830063000 | -1.738833000 |
| C  | 6.817430000  | 0.238338000  | -2.641912000 |
| C  | 6.372850000  | 1.501642000  | -2.236454000 |
| C  | 5.899420000  | 1.698048000  | -0.940722000 |
| C  | 5.866776000  | 0.633989000  | -0.014791000 |
| H  | 6.299292000  | -1.464960000 | 0.257444000  |
| H  | 7.136420000  | -1.811701000 | -2.044655000 |
| H  | 7.185732000  | 0.088515000  | -3.652286000 |
| H  | 6.398286000  | 2.334960000  | -2.932347000 |
| H  | 5.562684000  | 2.685357000  | -0.641563000 |
| C  | 5.332313000  | 0.792440000  | 1.360160000  |
| H  | 4.162658000  | 0.542749000  | 1.271008000  |
| H  | 5.683709000  | -0.011675000 | 2.015906000  |
| C  | 5.410785000  | 2.154263000  | 2.037340000  |
| H  | 4.893974000  | 2.932071000  | 1.467871000  |
| H  | 4.954564000  | 2.109920000  | 3.029982000  |
| H  | 6.454834000  | 2.467199000  | 2.159638000  |

**<sup>5</sup>H**

Zero-point correction= 0.591966 (Hartree/Particle)  
 Thermal correction to Energy= 0.639370  
 Thermal correction to Enthalpy= 0.640314  
 Thermal correction to Gibbs Free Energy= 0.495841  
 Sum of electronic and zero-point Energies= -3193.371198  
 Sum of electronic and thermal Energies= -3193.323794  
 Sum of electronic and thermal Enthalpies= -3193.322850  
 Sum of electronic and thermal Free Energies= -3193.467324

|    |              |              |              |
|----|--------------|--------------|--------------|
| Fe | -1.240867000 | 0.441063000  | 0.597322000  |
| O  | -2.970470000 | 0.682121000  | 1.027142000  |
| N  | 0.952502000  | 0.190986000  | 0.085334000  |
| C  | 1.228955000  | 0.813887000  | -1.240277000 |
| C  | 1.770092000  | 0.811981000  | 1.164643000  |
| C  | 1.011914000  | -1.306885000 | 0.074239000  |
| N  | -0.548339000 | -1.168643000 | 1.910222000  |
| N  | -1.193258000 | -1.178257000 | -0.894374000 |
| N  | -0.985224000 | 1.837454000  | -1.015216000 |
| N  | -0.296939000 | 1.903829000  | 1.859952000  |
| C  | 0.228355000  | 1.893705000  | -1.596527000 |
| C  | 1.049437000  | 1.968189000  | 1.821975000  |
| C  | 1.739510000  | 3.021024000  | 2.421935000  |
| C  | 1.015492000  | 4.000460000  | 3.100448000  |
| C  | -0.376775000 | 3.910465000  | 3.157490000  |
| C  | -0.999219000 | 2.849775000  | 2.511557000  |
| C  | 0.529849000  | 2.876137000  | -2.540606000 |
| C  | -0.455984000 | 3.791952000  | -2.900939000 |

|   |              |              |              |    |              |              |              |
|---|--------------|--------------|--------------|----|--------------|--------------|--------------|
| C | -1.717290000 | 3.712931000  | -2.305663000 | Cl | 4.081276000  | -4.153208000 | -0.626009000 |
| C | -1.940313000 | 2.724296000  | -1.356857000 | O  | 3.158079000  | -4.644762000 | -1.700092000 |
| C | -2.183719000 | -1.553723000 | -1.718074000 | O  | 4.027506000  | -2.654496000 | -0.575834000 |
| C | -2.018416000 | -2.589921000 | -2.634028000 | O  | 3.649153000  | -4.707792000 | 0.697992000  |
| C | -0.788660000 | -3.244829000 | -2.690525000 | O  | 5.475268000  | -4.593277000 | -0.922971000 |
| C | 0.244015000  | -2.850315000 | -1.835361000 | Cl | 4.694056000  | 3.130868000  | -0.650121000 |
| C | -0.000565000 | -1.806295000 | -0.949192000 | O  | 4.693407000  | 3.676485000  | 0.744911000  |
| C | 0.542313000  | -1.805595000 | 1.435915000  | O  | 4.588937000  | 1.631975000  | -0.594567000 |
| C | 1.136063000  | -2.860188000 | 2.121555000  | O  | 5.961169000  | 3.512842000  | -1.340188000 |
| C | 0.573589000  | -3.255190000 | 3.338560000  | O  | 3.520956000  | 3.679169000  | -1.402897000 |
| C | -0.551436000 | -2.591221000 | 3.827078000  | H  | 1.213004000  | -3.340472000 | -1.852383000 |
| H | -1.961252000 | -0.993159000 | 3.408261000  | C  | -1.087359000 | -1.545449000 | 3.079694000  |
| H | -1.010075000 | -2.872720000 | 4.767785000  | C  | -6.522226000 | 0.774247000  | 0.200793000  |
| H | 1.014328000  | -4.072930000 | 3.899349000  | C  | -6.998291000 | 1.375753000  | -0.954442000 |
| H | 2.010106000  | -3.358055000 | 1.712358000  | C  | -6.991220000 | 0.678063000  | -2.172036000 |
| H | 2.013107000  | -1.688124000 | -0.152602000 | C  | -6.503108000 | -0.635929000 | -2.213024000 |
| H | 1.962056000  | 0.061138000  | 1.936708000  | C  | -6.022562000 | -1.249180000 | -1.063147000 |
| H | 2.745315000  | 1.126091000  | 0.782012000  | C  | -6.012677000 | -0.559532000 | 0.186061000  |
| H | 2.244498000  | 1.218386000  | -1.271252000 | H  | -6.533718000 | 1.318447000  | 1.141582000  |
| H | 1.175767000  | 0.041903000  | -2.014081000 | H  | -7.381640000 | 2.391255000  | -0.914100000 |
| H | 2.819075000  | 3.075815000  | 2.332782000  | H  | -7.365001000 | 1.150423000  | -3.075140000 |
| H | 1.526455000  | 2.923278000  | -2.963597000 | H  | -6.504618000 | -1.183399000 | -3.151269000 |
| H | 1.531920000  | 4.829282000  | 3.573723000  | H  | -5.661663000 | -2.271145000 | -1.114234000 |
| H | -0.241647000 | 4.563316000  | -3.633479000 | C  | -5.517245000 | -1.139643000 | 1.384550000  |
| H | -0.972212000 | 4.652697000  | 3.676232000  | H  | -3.733360000 | 0.075531000  | 1.067553000  |
| H | -2.077704000 | 2.735631000  | 2.493620000  | H  | -5.640944000 | -0.559659000 | 2.297496000  |
| H | -2.889290000 | 2.618260000  | -0.842610000 | C  | -5.012178000 | -2.540600000 | 1.529310000  |
| H | -2.508952000 | 4.407994000  | -2.559983000 | H  | -4.443856000 | -2.877944000 | 0.656622000  |
| H | -3.120826000 | -1.014154000 | -1.630683000 | H  | -4.370666000 | -2.634579000 | 2.409913000  |
| H | -2.839100000 | -2.870700000 | -3.283784000 | H  | -5.842320000 | -3.251734000 | 1.662406000  |
| H | -0.630165000 | -4.054468000 | -3.395386000 |    |              |              |              |
